# Supplementary material
Source: ML conference proceedings conference paper supplement (https://openreview.net/forum?id=VtqyY2dvE6h)
Supplement: supplementary_material [file attachment]

---

# MDP Playground: A Design and Debug Testbed for Reinforcement Learning

---

Raghu Rajan<sup>1</sup>, Jessica Lizeth Borja Diaz<sup>1</sup>, Suresh Guttikonda<sup>1</sup>,  
Fabio Ferreira<sup>1</sup>, André Biedenkapp<sup>1</sup>, Jan Ole von Hartz<sup>1</sup> & Frank Hutter<sup>1,2</sup>

<sup>1</sup> University of Freiburg <sup>2</sup> Bosch Center for Artificial Intelligence  
rajanr@cs.uni-freiburg.de

## Abstract

We present *MDP Playground*, an efficient testbed for Reinforcement Learning (RL) agents with *orthogonal* dimensions that can be controlled independently to challenge agents in different ways and obtain varying degrees of hardness in generated environments. We consider and allow control over a wide variety of dimensions, including *delayed rewards*, *rewardable sequences*, *density of rewards*, *stochasticity*, *image representations*, *irrelevant features*, *time unit*, *action range* and more. We define a parameterised collection of fast-to-run toy environments in *OpenAI Gym* by varying these dimensions and propose to use these for the initial design and development of agents. We also provide wrappers that inject these dimensions into complex environments from *Atari* and *Mujoco* to allow for evaluating agent robustness. We further provide various example use-cases and instructions on how to use *MDP Playground* to design and debug agents. We believe that *MDP Playground* is a valuable testbed for researchers designing new, adaptive and intelligent RL agents and those wanting to unit test their agents.

## 1 Introduction

RL has succeeded at many disparate tasks, such as helicopter aerobatics, game-playing and continuous control [2, 38, 49, 10, 14, 17]. However, a lot of the insights obtained are on very complex and in many instances *blackbox* environments.

There are many different types of standard environments, as many as there are different kinds of tasks in RL [e.g. 57, 6, 11]. They specialise in *specific* kinds of tasks. The underlying assumptions in many of these environments are that of a Markov Decision Process (MDP) [see, e.g., 44, 52] or a Partially Observable MDP (POMDP) [see, e.g., 22, 25]. However, there is a lack of simple and *general* MDPs which capture common difficulties seen in RL and let researchers experiment with them in a fine-grained manner. Many researchers design their own toy problems which capture the key aspect of their problem and then try to gain *whitebox* insights because the standard complex environments, such as *Atari* and *Mujoco*, are too expensive or too opaque for the initial design and development of their agent. To standardise this initial design and debug phase of the development pipeline, we propose a platform which *distils* difficulties for MDPs that can be generalised across RL problems and allows to *independently* inject these difficulties.

Disadvantages of *complex* environments when considered from a point of view of a design and debug testbed include: **1)** They are very expensive to evaluate. For example, a DQN [38] run on *Atari* [6] took us 4 CPU days and 64GB of memory to run. **2)** The environment structure itself is so complex that it leads to “lucky” agents performing better (e.g., in [18]). Furthermore, different implementations even using the same libraries can lead to very different results [18]. **3)** Many difficulties are concurrently present in the environments and do not allow us to independently test

their impact on agents’ performance. During the design phase, we need environments to encapsulate, preferably orthogonally, the different difficulties present. For instance, MNIST [32] captured some key difficulties required for computer vision (CV) which made it a good testbed for designing and debugging CV algorithms, even though it cannot be used to directly learn models for much more specific CV applications such as classification of plants or medical image analysis.

The main contributions of this paper are:

- We identify and discuss dimensions of MDPs that can have a significant effect on agent performance, both for discrete and continuous environments;
- We discuss how to use *MDP Playground* to design and debug agents with various experiments; toy experiments can be run in as few as 30 seconds on a single core of a laptop;
- We discuss insights that can be gained with the various considered dimensions; transferring insights from toy to complex environments for some under-studied dimensions led to significant improvements in performances on complex environments.

## 2 Dimensions of MDPs

We try to exhaustively identify orthogonal *dimensions* of hardness in RL by going over the many components of a (PO)MDP. By *orthogonal*, we mean that these dimensions are present independent of each other in environments. This was **tried exhaustively** to allow as many dimensions as possible for researchers to systematically study them and gain new insights.

We define an MDP as a 7-tuple  $(S, A, P, R, \rho_o, \gamma, T)$ , where  $S$  is the set of states,  $A$  is the set of actions,  $P : S \times A \rightarrow S$  describes the transition dynamics,  $R : S \times A \times S \rightarrow \mathbb{R}$  describes the reward dynamics,  $\rho_o : S \rightarrow \mathbb{R}^+$  is the initial state distribution,  $\gamma$  is the discount factor and  $T$  is the set of terminal states. We define a POMDP with two additional components -  $O$  represents the set of observations and  $\Omega : S \times A \times O \rightarrow \mathbb{R}^+$  describes the probability density function of an observation given a state and action. To clarify terminology, following [51] we will use *information state* to mean the state representation used by the agent and *belief state* as the posterior belief of the unobserved state given the full observation history. If the belief state were to be used as the information state by an agent, this would be sufficient to compute an optimal policy. However, since the full observation history is not tractable to store for many environments, agents in practice use the last few observations as their information state which renders it only partially observable. This is important because many of the motivated dimensions are actually due to the information state being non-Markov.

### 2.1 MDPs in MDP Playground

**Toy Environments** The toy environments are cheap and encapsulate all the identified dimensions. The components of the MDP can be automatically generated according to the dimensions or can be user-defined. Any dimension not specified is set to a vanilla default value. Further, the underlying MDP state is exposed in an *augmented\_state* variable, which allows users to design agents that may try to identify the true underlying MDP state given the observations. We now briefly describe the auto-generated discrete and continuous environments, since we use these for the experiments section and expect that these will cover the majority of the use-cases. This is followed by implementation details of selected dimensions; details for all dimensions can be found in Algorithm 1 in Appendix C.

**Discrete Environments** In the discrete case,  $S$  and  $A$  contain *categorical* elements, and random instantiations of  $P$  and  $R$  are generated after the remaining dimensions have been set. The generated  $P$  and  $R$  are deterministic and held fixed for the environment. We keep  $\rho_o$  to be uniform over the non-terminal states, and  $T$  is fixed to be a subset of  $S$  based on a chosen *terminal state density*.

**Continuous Environments** In the continuous case, environments correspond to the simplest real world task we could find: moving a rigid body to a target point, similar to [16] and [28].  $P$  is formulated such that each action dimension affects the corresponding space dimension -  $s$  is set to be equal to the action applied for *time unit* seconds on a rigid body. This is integrated over time to yield the next state.  $R$  is designed such that the reward for the current time step is the distance travelled towards the target since the last step.

**Both, the discrete and continuous environments, in *MDP Playground* can be described as graphical POMDPs.**

## 87 2.2 Motivations of Dimensions and Implementations

88 We now describe many of the dimensions from a general point of view and their implementations in  
 89 *MDP Playground*. For clarity, we describe only the dimensions with experiments in the main paper  
 90 here in greater detail and refer the reader to Appendix B and the documentation for more detailed  
 91 descriptions of all the dimensions.

92 **Reward Delay** For many environments, in many situations, agents perform an action that is conse-  
 93 quential to receiving a reward but the agent is only rewarded in a *delayed* manner [see e.g. 4] (see  
 94 Figure 1d). For example, shooting at an enemy ship in *Space Invaders* leads to rewards much later  
 95 than the action of shooting. Any action taken after that is inconsequential to obtaining the reward for  
 96 destroying that enemy ship. In *MDP Playground*, the reward is artificially delayed by a non-negative  
 97 integer number of timesteps,  $d$ .

98 **Reward Density** Environments can also be characterised by their *reward density*. When an en-  
 99 vironment has denser rewards (see Figure 1a), one is more likely to obtain a supervisory reward  
 100 signal. In sparse reward settings [15], the reward is 0 more frequently, especially, for example, in  
 101 continuous control environments where a long trajectory is followed and then a single non-zero  
 102 reward is received at its end. In *MDP Playground*, for discrete environments, the *reward density*,  
 103  $rd$ , is defined as the fraction of possible sequences of length  $n$  that are actually rewarded by the  
 104 environment, given that  $n$  is constant. If  $num_r$  sequences are rewarded, we define the reward density  
 105 to be  $rd = num_r / \frac{(|S|-|T|)!}{(|S|-|T|-n)!}$  and the sparsity as  $1 - rd$ . For continuous environments, density is  
 106 controlled by having a sparse or dense environment using a *make\_denser* configuration option.

107 **Stochasticity** Another characteristic of environments that can significantly impact performance of  
 108 agents is *stochasticity*. The environment, i.e., dynamics  $P$  and  $R$ , may be stochastic or may seem  
 109 stochastic to the agent due to partial observability or sensor noise (see Figure 1b-1c). A robot  
 110 equipped with a rangefinder, for example, has to deal with various sources of noise in its sensors [55].  
 111 In *MDP Playground*, for discrete environments, *transition noise*  $t\_n \in [0, 1]$ ; with probability  $t\_n$ ,  
 112 an environment transitions uniformly at random to a state that is not the *true* next state given by  $P$ .  
 113 For discrete environments, *reward noise*  $r\_n \in \mathbb{R}$ ; a normal random variable distributed according  
 114 to  $\mathcal{N}(0, \sigma^2_{r\_n})$  is added to the *true* reward. For continuous environments, both  $p\_n$  and  $r\_n$  are  
 115 normally distributed and directly added to the states and rewards.

116 **Irrelevant Features** Environments also tend to have a lot of *irrelevant features* [45] that one need  
 117 not focus on. This holds for both table-based learners and approximators like Neural Networks  
 118 (NNs). NNs additionally can even fit random noise [64] and having irrelevant features is likely  
 119 to degrade performance. For example, in certain racing car games, though the whole screen is  
 120 visible, concentrating on only the road would be more efficient without loss in performance. In *MDP*  
 121 *Playground*, for discrete environments, a new discrete dimension with its own transition function  
 122  $P_{irr}$  which is independent of  $P$ , is introduced. However, only the discrete dimension corresponding  
 123 to  $P$  is *relevant* to calculate the reward function. Similarly, in continuous environments, dimensions  
 124 of  $S$  and  $A$  are labelled as irrelevant and not considered in the reward calculation.

125 **Representations** Another aspect is that of *representations*. The same underlying state may have  
 126 many different external representations/observations, e.g., *feature space* vs *pixel space*. Mujoco tasks  
 127 may be learnt in feature space vs directly from pixels, and Atari games can use the underlying RAM  
 128 state or images. For images, various image transformations [*shift*, *scale*, *rotate*, *flip* and others; 19]  
 129 may manifest as observations of the same underlying state and can pose a challenge to learning. In  
 130 *MDP Playground*, for discrete environments, when this aspect is enabled, each categorical state is  
 131 associated with an image of a regular polygon which becomes the externally visible observation  $o$  to  
 132 the agent. This image can further be transformed by *shifting*, *scaling*, *rotating* or *flipping*, which are  
 133 applied at random to the polygon whenever an observation is generated. For continuous environments,  
 134 image observations can be rendered for 2D environments. Examples of some generated states can be  
 135 seen in Figures 10-11 in Appendix I.

136 **Time Unit and Action Range** For continuous control problems, we describe 2 additional dimensions  
 137 here: *action range* [26], a weight penalising actions; and *time unit*, the discretisation of time (see  
 138 Figure 1e).

139 We now summarise the dimensions identified above (with the (PO)MDP component they impact in  
 140 brackets):

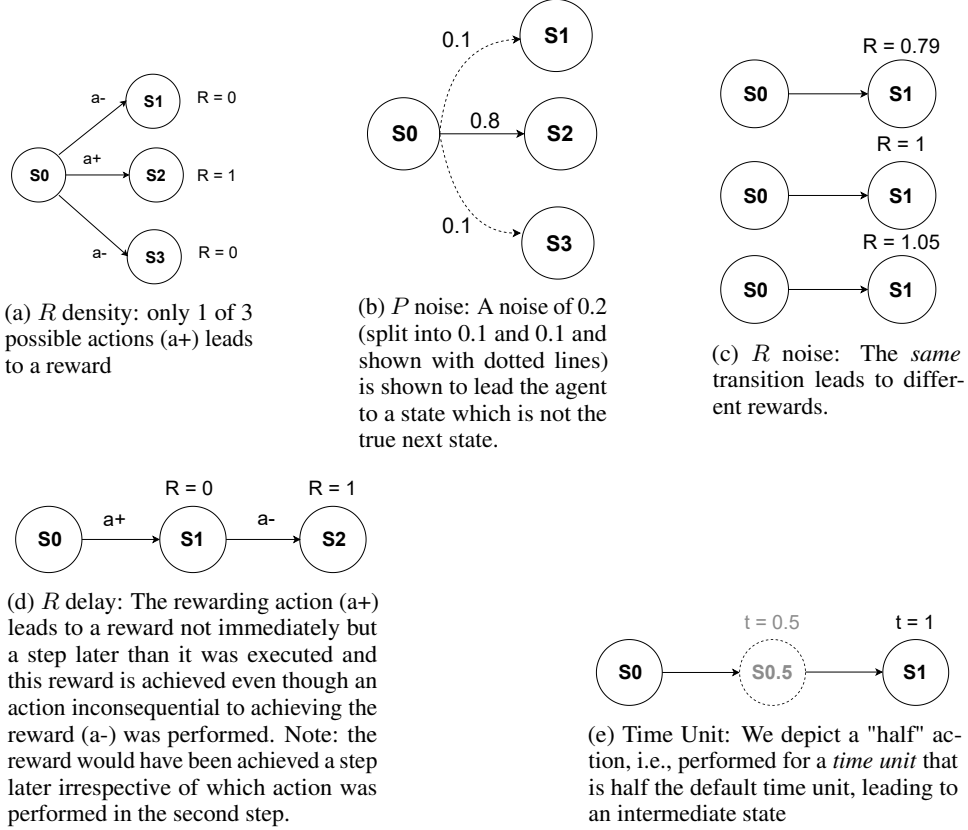

Figure 1: We depict some of the dimensions visually following [59]. Not all states and actions are depicted to focus on the dimension of interest. Rewarding actions are shown as  $a+$  while actions shown as  $a-$  are not rewarding. Reward is shown as  $R$  and time unit as  $t$ .

- Reward Delay ( $R$ )
- Reward Density ( $R$ )
- Transition Noise ( $P$ )
- Reward Noise ( $R$ )
- Irrelevant Features ( $O$ )
- Representations ( $O$ )
- Action Range ( $A$ )
- Time Unit ( $P$ )

Only selected dimensions are included here, to aid in understanding and to show use-cases for *MDP playground*. Trying to exhaustively identify dimensions has led to a very flexible platform and Appendix B lists all the dimensions of MDP Playground. We would like to point out that it largely depends on the domain which dimensions are important. For instance, in a video game domain, a practitioner may not want to inject any kind of noise into the environment, if their only aim is to obtain high scores, whereas in a domain like robotics adding such noise to a deterministic simulator could be crucial in order to obtain generalisable policies [56].

### 3 MDP Playground

**Code samples** An environment instance is created as easily as passing a Python dict:

```
from mdp_playground.envs import RLToyEnv
config = {
    'state_space_type': 'discrete',
    'action_space_size': 8,
    'delay': 1,
    'sequence_length': 3,
    'reward_density': 0.25,
}
env = RLToyEnv(**config)
```

**Very low-cost execution** Experiments with *MDP Playground* are cheap, allowing academics without special hardware to perform insightful experiments. Wall-clock times depend a lot on the agent, network size (in case of NNs) and the dimensions used. Nevertheless, to give the reader an idea of the runtimes involved, DQN experiments (with a network with 2 hidden layers of 256 units each) took on average 35s for a *complete* run of DQN



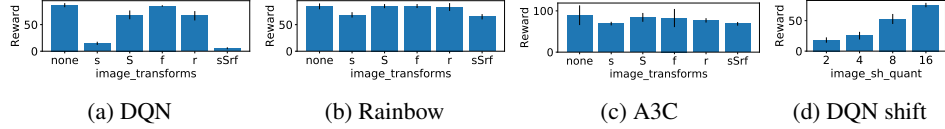

Figure 2: AUC of episodic reward at the end of training for the different agents **when varying representation**. 's' denotes *shift* (quantisation of 1), 'S' *scale*, 'f' *flip* and 'r' *rotate* in the labels in the first three subfigures and *image\_sh\_quant* represents quantisation of the *shifts* in the DQN experiment for this. Error bars represent 1 standard deviation. Note the different reward scales.

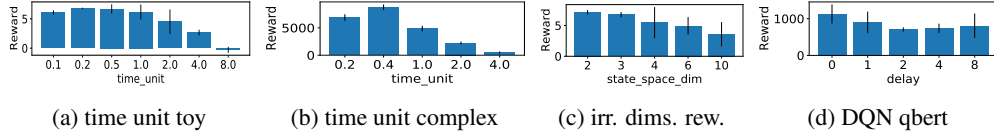

Figure 3: **a** and **b**: DDPG with **time unit** on toy and complex (HalfCheetah) environment at the end of training (*time unit* is relative to the defaults). **c**: DDPG with **irrelevant dimensions** injected on the toy environment. **d**: DQN on qbert. Error bars represent 1 standard deviation. Note the different y-axis scales.

for 20 000 environment steps. In this setting, we restricted Ray RLLib [33] and the underlying Tensorflow [1] to run on *one core of a laptop* (core-i7-8850H CPU – the full CPU specifications for a single core can be found in Appendix R). This equates to roughly 30 minutes for the *entire* delay experiment shown in Figure 12a which was plotted using 50 runs (10 seeds  $\times$  5 settings for *delay*; these 50 runs could also be run in an embarrassingly parallel manner on a cluster). Even when using the more expensive continuous or representation learning environments, runs were only about 3-5 times slower.

**Complex Environment Wrappers** We further provide wrappers for *Atari* and *Mujoco* which can be used to inject some of the dimensions also into complex environments.

**Design decisions** While many dimensions can seem challenging at first, it is also the nature of RL that different dimensions tend to be important in different specific applications. The video game domain was provided as an example of this in Section 2.2. Another example is of *reward scale*. The agents we tested here re-scale or clip rewards already and the effects of this dimension are not as important as they would be otherwise. To maintain the flexibility of having as many dimensions as possible and yet keep the platform easy to use, **default** values are set for dimensions that are not configured. This effectively turns off those dimensions. Thus, as in the code example, users only need to provide dimensions they are interested in.

Further design decisions are discussed in detail in Appendix G.

## 4 Using MDP Playground

We discuss in detail various experiments along with how they may be used to design new agents and to debug existing agents. For the experiments, we set  $|S|$  and  $|A|$  to 8 and the *terminal state density* to 0.25. The *reward scale* is set to 1.0 whenever a reward is given by the environment. We evaluated *Rllib* implementations [33] of DQN [38], Rainbow DQN [20], A3C [37] on discrete environments and DDPG [34], TD3 [14] and SAC [17] on continuous environments over grids of values for the dimensions. Hyperparameters and the tuning procedure used are available in Appendix O. We used fully connected networks except for pixel-based representations where we used Convolutional Neural Networks (CNNs) [31].

### 4.1 Designing New Agents

We hope our toy environments will help identify inductive biases needed for designing new RL agents without getting confounded by other sources of "noise" in the evaluation. What is important for doing

192 this is to be able to identify if the trends seen on the toy environments would also occur for more  
193 complex environments. We now provide empirical support for this with several experiments.

194 We tested the trends of the dimensions on more complex Atari and Mujoco tasks. For Atari, we ran  
195 the agents on *beam\_rider*, *breakout*, *qbert* and *space\_invaders* when varying the dimensions *delay*  
196 and *transition noise*. For Mujoco, we ran the agents on *HalfCheetah*, *Pusher* and *Reacher* using  
197 *mujoco-py* when varying the dimensions *time unit* and *action range*. We evaluated 5 seeds for 500k  
198 steps for *Pusher* and *Reacher*, 3M for *HalfCheetah* and 10M (40M frames) for Atari. The values  
199 shown for *action range* and *time unit* are relative to the ones used in Mujoco.

200 **Varying representations** We turned on image representations for discrete environments and applied  
201 various transforms (*shift*, *scale*, *rotate* and *flip*) one at a time and also all at once. We observed that  
202 the more transforms are applied to the images, the harder it is for agents to learn, as can be seen in  
203 Figures 2a-c. This was to be expected since there are many more combinations to generalise over for  
204 the agent.

205 It is important to note, from the point of view of a design platform, that our platform allows us to  
206 identify the inductive bias of CNNs being good for image observations without having to conduct  
207 such experiments on complex and expensive environments. This is because the toy environments  
208 capture many key features of image representations and thus the image classification capabilities of  
209 CNNs can help identify the underlying MDP state. In a similar manner, we have captured key features  
210 of other dimensions. If one were to design a new inductive bias which helps the agent identify the  
211 underlying MDP state in the presence of the other dimensions, this could be tested in a coarse and  
212 quick manner on our platform.

213 **Varying time unit** We observed that the *time unit* has an optimal value which has significant impact  
214 on performance in the toy continuous environment (Figure 3a), i.e., that it can be neither too small  
215 nor too large. We decided to tune the *time unit* also for complex environments (Figures 3b, 8 and 9).  
216 The insight from the toy environment transferred to the complex case and there were gains of even  
217 100% in some cases over the default value of the time units used in the "expert-tuned" environments.  
218 A further insight to be had is that for simpler environments like the toy, *Pusher* and *Reacher*, the  
219 effect of the selection of the *time unit* was not as pronounced as for a more complex environment like  
220 *HalfCheetah*. This makes intuitive sense as one can expect a narrower range of values to work for  
221 more complex environments. This shows that it is even more important to tune such dimensions for  
222 more complex environments.

223 The *basic* agent design we showed above does this once and sets its optimal *time unit* statically. An  
224 ideal adaptive agent design would even set the *time unit* in an *online* manner. Since the trends from  
225 the toy environment coarsely transfer to the complex environments, coarse and quick insights can be  
226 gained on the toy environments.

227 **Varying action range** We observed similar trends as for *time unit*, in that there was an optimal  
228 value of *action range*, i.e., that it can be neither too small nor too large. Figure 9 shows this for all  
229 considered agents on *HalfCheetah* (for SAC and DDPG, runs for *action range* values  $\geq 2$  and  $\geq 4$   
230 crashed and are absent from the plot). This supports the insight gained on our simpler environment  
231 that tuning this value may lead to significant gains for an agent. For already tuned environments, such  
232 as the ones in *Gym*, this dimension is easily overlooked but when faced with new environments setting  
233 it appropriately can lead to substantial gains. In fact, even in the tuned environment setting of *Gym*,  
234 we found that all three algorithms performed best for an *action range* 0.25 times the value found in  
235 *Gym* for *Reacher* (Figures 8c, 8k, 8g in Appendix H). Moreover, the learning curves in Appendix  
236 N further show that for increasing *action range* the training gets more variant. The difference in  
237 performances across the different values of *action range* is much greater in the complex environments.  
238 We believe this is due to correlations within the multiple degrees of freedom as opposed to a rigid  
239 object in the toy environment.

240 To the best of our knowledge, the impact of *time unit* and *action range* is under-researched while  
241 developing agents because the standard environments have been pre-configured by experts. However,  
242 it's clear from Figure 3b, that pre-configured values were not optimal and even basic tuning improves  
243 performance significantly in even *known* environments. In a completely *unknown* environment, if we  
244 want agents to perform optimally, these dimensions would need to be taken into account even more  
245 when designing agents.

**Varying transition noise** We observe similar trends for injecting transition noise into Atari environments for all three agents as for the toy environments. We also observe that for some of the environments, transition noise actually helps improve performance. This has also been observed in prior work [61]. This happens when the exploration policy was not tuned optimally since inserting transition noise is almost equivalent to  $\epsilon$ -greedy exploration for low values of noise. We also observed a similar effect for the toy environments in Figure 18 in Appendix J. However, we also observe that performance drop is different for different environments. This is to be expected as there are other dimensions of hardness which we cannot control or measure for these environments.

**Varying reward delay** We see that on average performance drops for the delay experiments when more delay is inserted, as was the case for the toy environments. For *qbert* (Figure 3d), these drops are greater on average across the agents. However, for *breakout* (Figure 6b), in many instances, we don't even see performance drops. In *beam\_rider* (Figure 6a) and *space\_invaders* (Figure 6d), the magnitude of these effects are intermediate to *breakout* and *qbert*. This trend becomes clearer when we also look at Figures 7b-p in Appendix H. We believe this is because large delays from played action to reward are already present in *breakout*, which means that inserting more delays does not have as large an effect as in *qbert* (Figures 3d). Agents are strongest affected in *qbert* which, upon looking at gameplay, we believe has the least delays from rewarding action to reward compared to the other games. The trends for delay were noisier than for transition noise, even though on average the trends transferred from MDP Playground to the complex environments. Many considered environments tend to also have repetitive sequences which would dilute the effect of injecting delays. Many of the learning curves in Appendix N, with delays inserted, are indistinguishable from normal learning curves. We believe that, in addition to the motivating examples, this is empirical evidence that delays are already present in these environments and so inserting them does not cause the curves to look vastly different. In contrast, when we see learning curves for transition noise, we observe that, as we inject more and more noise, training tends to a smoother curve as the agent tends towards becoming a completely random agent.

Additionally, we also have experiments with similar trends also for another dimension - *reward noise*. The average rank correlation over 12 experiments (3 agents x 4 Atari environments) was 0.867 for *transition noise*, 0.617 for *reward delay*, and 0.733 for *reward noise*. Tables 1, 2 and 3 list the individual rank correlation for each experiment, i.e. agent, environment and dimension.

To analyse transfer of dimensions between toy and complex benchmarks, for the Atari experiments, we use the Spearman rank correlation coefficient between corresponding toy and complex experiments for performance across different values of the dimension of hardness. The Spearman correlation was  $\geq 0.7$  for 19 out of 24 experiments and a positive correlation for four of the remaining five. DQN with delays added on *breakout* was the only experiment with correlation 0.

**Varying irrelevant features** We observed that introducing *irrelevant dimensions* to the control problem, while keeping the number of relevant dimensions fixed to 2, decreased an agent's performance (see Figures 3c & 17f). This gives us the insight that having irrelevant features interferes with the learning process. An inductive bias that learns to focus only on the relevant dimensions could be unit-tested to gain coarse insights on the toy environments.

We have shown similar trends for SAC on HalfCheetah in Figure 9a in Appendix H.

**Varying Multiple Dimensions** In *MDP Playground*, it is possible to vary multiple dimensions at the same time in the same base environment. For instance, Figure 4d shows the interaction effect (an inversely proportional relationship) between the *action range* and the *time unit* in the continuous toy environment with DDPG. This insight allows us to design an adaptive agent which sets its *action range* depending on the *time unit* and vice versa. Since many real-world systems can be described in terms of a simple rigid body moving towards a target point, the toy continuous environment is a useful testbed for this.

More such experiments can be found in Appendix L, including varying both *P* and *R noises* together in discrete environments and more. Further design ideas for new agents can be found in Appendix E.

## 4.2 Insights into Existing Agents

Apart from the insights gained for designing agents above, we discuss more insights for existing agents explicitly here.

299 The experiment for varying representations on toy environments discussed above (Figures 2a-c)  
 300 further showed that the degradation in performance is much stronger for DQN compared to Rainbow  
 301 and A3C which are known to perform better than DQN in complex environments.

302 This led us to another interesting insight regarding the inductive bias of CNNs. It was unexpected  
 303 for us that the most problematic transform for the agents to deal with was *shift*. Despite the spatial  
 304 invariance learned in CNNs [30], our results imply that that seems to be the hardest one to adapt to.  
 305 As these trends were strongest in DQN, we evaluated further ranges for the individual transforms  
 306 for DQN. Here, *shifts* had the most possible different combinations that could be applied to the  
 307 images. Therefore, we quantised the *shifts* to have fewer possible values. Figure 2d shows that DQN's  
 308 performance improved with increasing quantisation (i.e., fewer possible values) of *shift*. We noticed  
 309 similar trends for the other transforms as well, although not as strong as they do not have as many  
 310 different values as *shift* (see Figures 29b-c in Appendix J). We emphasize that in a more complex  
 311 setting, we would have easily attributed some of these results to luck but in the setting where we had  
 312 individual control over the dimensions, our platform allowed us to dig deeper in a controlled manner.

313 Another insight we gain is from the *time unit* experiment (see Figures 3a and 3b), which indicates  
 314 *time unit* should not be infinitesimally small to achieve too fine-grained control since there is an  
 315 optimal *time unit* for which we should repeat the same action [7].

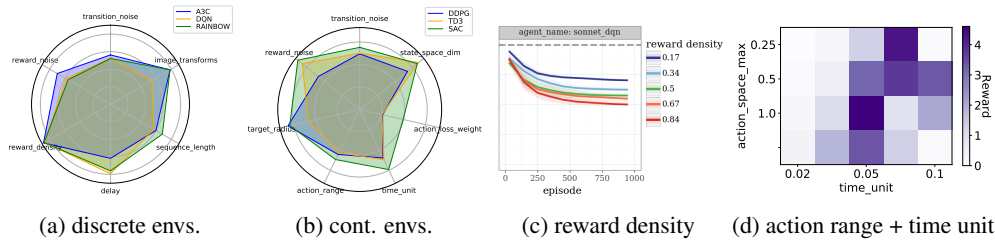

Figure 4: Analysing and Debugging

316 In Figure 3d, where we varied *delay* on *qbert*, we show how a dimension induces hardness in an  
 317 environment. This result is representative of the experiments on toy and complex environments which  
 318 are included in Appendix H and H with the difference that results are noisier in complex environments  
 319 since the dimensions are already present there in varying degrees. We, thus, studied what kinds  
 320 of failure modes can occur when an agent is faced with such dimensions and even obtained noisy  
 321 learning curves typically associated with RL on the *toy* environments as can be seen in Appendix M.

322 At the same time, the experiment in Figure 3d also shows how the complex environment wrappers  
 323 allow researchers, who are curious, to study the robustness of their agents to these dimensions on  
 324 complex environments, without having to fiddle with lower-level code. This is a typical use-case  
 325 further down the agent development pipeline, i.e., close to deployment.

326 **Design and Analyse Experiments** We allow the user the power to inject dimensions into toy or  
 327 complex environments in a fine-grained manner. This can be used to define custom experiments with  
 328 the dimensions. The results can be analysed in an accompanying *Jupyter notebook* using the 1D  
 329 plots. There are also radar plots inspired by bsuite [42], but with more flexibility in choosing the  
 330 dimensions, and these can even be applied to complex environment experiments. Since, different  
 331 users might be interested in different dimensions, these are loaded dynamically from the data. For  
 332 instance, radar plots for the dimensions we varied in our toy experiments can be seen as in Figures 4a  
 333 and 4b.

### 334 4.3 Debugging Agents

335 Analysing how an agent performs under the effect of various dimensions can reveal unexpected  
 336 aspects of an agent. For instance, when using bsuite agents, we noticed that when we varied our  
 337 environment's *reward density*, the performance of the bsuite Sonnet DQN agent would go up in  
 338 proportion to the density (see Figure 4c). This did not occur for other bsuite agents. This seemed to  
 339 suggest something different for the DQN agent and when we looked at DQN's hyperparameters we  
 340 realised that it had a fixed  $\epsilon$  schedule while the other agents had decaying schedules. Such insights

can easily go unnoticed if the environments used are too complex. The high bias nature of our toy environments helps debug such cases.

In another example, in one of the Ray versions we used, we observed that DQN was performing well on the *varying representations* environment while Rainbow was performing poorly. We were quickly able to ablate additional Rainbow hyperparameters on the toy environments and found that their noisy nets [13] implementation was broken (see Figure 5 in Appendix). We then tested and observed the same on more complex environments. This shows how easily and quickly agents can be debugged to see if something major is broken. This, in combination with their low computational cost, also makes a case to use the toy environments in Continuous Integration (CI) tests on repositories.

Further, we believe the same structured nature of *MDP Playground* also makes it a valuable tool for theoretical research. We evaluated tabular baselines Q-learning [52], Double Q-learning [60] and SARSA [52] on the discrete non-image based environments with similar qualitative results to those for deep agents. These can be found in Appendix K. This makes our platform a bridge between theory and practice where both kinds of agents can be tested.

The experiments here are only a glimpse into the power and flexibility of MDP Playground. Users can even upload custom  $P$ s and  $R$ s and custom images for representations  $O$  and our platform takes care of injecting the other dimensions for them (wherever possible). This allows users to control different dimensions in the same base environment and gain further insights.

## 5 Discussion and Related Work

The *Behaviour Suite for RL* [bsuite; 42] is the closest related work to MDP Playground. [42] collect known (toy) environments from the literature and use these to characterise agents based on their performance on these environments. Most environments in *bsuite* can be seen as an intermediate step between our MDPs and more complex environments. This is because *bsuite*'s environments are already more specific and complex than the toy environments in *MDP Playground*. This makes *bsuite*'s dimensions not orthogonal and *atomic* like ours and thus not individually controllable. Fine-grained control is a feature that sets our platform apart. *bsuite* has a collection of *presets* chosen by experts which work well but would be much harder to play around with. While *MDP Playground* also has good presets through default values defined for experiments, it is much easier to configure. Further, it also means that *bsuite* experiments are much more expensive than ours. While *bsuite* itself is quite cheap to run, *MDP Playground* experiments are an order of magnitude cheaper. In contrast to *bsuite*, we demonstrate how the identified trends on the toy and complex environments can be used to design and debug agents. Further, *bsuite* currently has no toy environment for Hierarchical RL (HRL) agents while *MDP Playground*'s rewardable sequences fits very well with HRL. Finally, *bsuite* offers **no continuous control environments**, whereas MDP Playground provides both discrete and continuous environments. This is important because several agents like DDPG, TD3, SAC are designed for continuous control. A more detailed comparison with *bsuite* and other related work can be found in Appendix D.

Toybox [58] and Minatar [62] are also cheap platforms like ours with similar goals of gaining deeper insights into RL agents. However, their games target the specific *Atari* domain and are, like *bsuite*, more specific and complementary to our approach.

We found [3] the most similar work to ours in spirit. They propose that current deep RL research has been increasing the complexity of the dynamics  $P$  but has not paid much attention to the state distributions and reward distribution over which RL policies work and that this has made RL agents brittle. **This also raises concerns about the narrow scope of these so-called "complex" environments and we aim to remedy that with our dimensions.** We agree with them in this regard. However, they only target continuous environments. We capture their dimensions in a different manner and offer many more dimensions with fine-grained control. Furthermore, their code is not open-source.

Further research includes *Procgen* [11], *Obstacle Tower* [24] and *Atari* [6]. *Procgen* adds various heterogeneous environments and tries to quantify generalisation in RL. In a similar vein, *Obstacle Tower* provides a generalization challenge for problems in vision, control, and planning. These benchmarks do not capture orthogonal dimensions of difficulty and as a result, they do not have the same type of fine-grained control over their environments' difficulty and neither can each dimension be controlled independently. We view this as a crucial aspect when testing new agents. [12] provides



394 some overlapping dimensions with our platform but it consists of only continuous environments, and  
395 doesn't target the toy domain.

## 396 **6 Limitations of the Approach and its Ethical and Societal Implications**

397 The toy environments are meant to be design and debug testbeds and not for engineering/tuning the  
398 final agent HPs. As such, they are extremely cheap compared to complex environments and (as one  
399 would expect), they can only be used to draw high-level insights that transfer and are likely not as  
400 discriminating as complex environments for many of the finer changes between RL agents. They  
401 also cannot be used directly to determine the values of hyperparameters (HPs) to use on complex  
402 environments. For example, just as complex environments require bigger NNs, they would need  
403 correspondingly different HPs, such as bigger replay buffers. [Even the performance of agents in bsuite \(which has more complex environments than our benchmark\) do not transfer to the more complex environments \(<https://github.com/deepmind/bsuite/issues/14>\). In a similar vein, to the best of our knowledge, MNIST hyperparameters do not transfer to ImageNet and it is only used for testing out initial design ideas.](#)

408 Further, high-dimensional control problems where there are interaction effects between degrees of  
409 freedom are not captured in the toy rigid body control problem as this is the domain of complex  
410 benchmarks and beyond the scope of this platform. (The platform does provide complex environment  
411 wrappers, though, which inject some of the mentioned dimensions. We couldn't find such wrappers  
412 in the literature/on the Internet.)

413 Finally, Multi-Agent RL, Multi Objective RL, Time Varying MDPs (and probably some more research  
414 areas) are beyond the scope of the current work.

415 In terms of the broader impact on society and ethical considerations, we foresee no direct impact,  
416 only indirect consequences through RL since our work promotes standardisation and reproducibility  
417 which should accelerate RL research. An additional environmental impact would be that, at least,  
418 prototyping and testing of agents could be done cheaply, reducing carbon emissions.

## 419 **7 Conclusion and Future Work**

420 We introduced a low-cost platform to design and debug RL agents and provided instructions on  
421 how to use it with supporting experiments. The platform allows us to disentangle various factors  
422 that make RL environments hard by providing fine-grained control over various dimensions. This  
423 also lends itself to easily achievable insights and helps debug agents. We further demonstrated  
424 how the performance of the studied agents is adversely affected by the dimensions. To the best of  
425 our knowledge, we are the first to perform a principled study of how significant aspects such as  
426 non-Markov information states, irrelevant features, representations and low-level dimensions, like  
427 time discretisation, affect agent performance.

428 We want *MDP Playground* to be a community-driven effort and it is open-source for the benefit  
429 of the RL community at <https://github.com/automl/mdp-playground>. While we tried to  
430 exhaustively identify dimensions of hardness, it is unlikely that we have captured *all* orthogonal  
431 dimensions in RL. We welcome more dimensions that readers think will help us encapsulate further  
432 challenges in RL and will add them based on the community's thoughts.

433 **Future work can tackle not only theoretical development of such dimensions but also additional  
434 analysis of such dimensions in complex domains such as *Mujoco* and dexterous manipulation [46].**

435 Given the current brittleness of RL agents [18], and many claims that have been challenged [5, 58],  
436 we believe RL agents need to be tested on a lower and more basic level to gain insights into their  
437 inner workings. *MDP Playground* is like a programming language for regularly structured MDPs  
438 which allows delving deeper into the inner workings of RL agents.

## Acknowledgements

The authors gratefully acknowledge support by BMBF grant DeToL, by the Bosch Center for Artificial Intelligence, and by the European Research Council (ERC) under the European Union’s Horizon 2020 research and innovation programme under grant no. 716721, by the state of Baden-Württemberg through bwHPC and the German Research Foundation (DFG) through grant no INST 39/963-1 FUGG. They would like to thank their group, especially Joerg, Steven, Samuel, for helpful feedback and discussions. Raghu would like to additionally thank Michael Littman for his feedback and encouragement and the RLSS 2019, Lille organisers and participants who he had interesting discussions with.

## References

- [1] M. Abadi, A. Agarwal, P. Barham, E. Brevdo, Z. Chen, C. Citro, G. Corrado, A. Davis, J. Dean, M. Devin, S. Ghemawat, I. Goodfellow, A. Harp, G. Irving, M. Isard, Y. Jia, R. Jozefowicz, L. Kaiser, M. Kudlur, J. Levenberg, D. Mané, R. Monga, S. Moore, D. Murray, C. Olah, M. Schuster, J. Shlens, B. Steiner, I. Sutskever, K. Talwar, P. Tucker, V. Vanhoucke, V. Vasudevan, F. Viégas, O. Vinyals, P. Warden, M. Wattenberg, M. Wicke, Y. Yu, and X. Zheng. TensorFlow: Large-scale machine learning on heterogeneous systems, 2015.
- [2] P. Abbeel, A. Coates, and A. Y Ng. Autonomous helicopter aerobatics through apprenticeship learning. *The International Journal of Robotics Research*, 29(13):1608–1639, 2010.
- [3] Olov Andersson and Patrick Doherty. Toward robust deep rl via better benchmarks: Identifying neglected problem dimensions. In *2nd Reproducibility in Machine Learning Workshop at ICML 2018, Stockholm, Sweden*, 2018.
- [4] J. A. Arjona-Medina, M. Gillhofer, M. Widrich, T. Unterthiner, J. Brandstetter, and S. Hochreiter. RUDDER: return decomposition for delayed rewards. In H. M. Wallach, H. Larochelle, A. Beygelzimer, F. d’Alché-Buc, E. B. Fox, and R. Garnett, editors, *Proceedings of the 32nd International Conference on Advances in Neural Information Processing Systems (NeurIPS’19)*, pages 13544–13555, 2019.
- [5] Akanksha Atrey, Kaleigh Clary, and David D. Jensen. Exploratory not explanatory: Counterfactual analysis of saliency maps for deep reinforcement learning. In *8th International Conference on Learning Representations, ICLR 2020, Addis Ababa, Ethiopia, April 26-30, 2020*. OpenReview.net, 2020.
- [6] M. G. Bellemare, Y. Naddaf, J. Veness, and M. Bowling. The arcade learning environment: An evaluation platform for general agents. *Journal of Artificial Intelligence Research*, 47:253–279, Jun 2013.
- [7] A. Biedenkapp, R. Rajan, F. Hutter, and M. Lindauer. Towards TempoRL: Learning when to act. In *Workshop on Inductive Biases, Invariances and Generalization in RL (BIG@ICML’20)*, July 2020.
- [8] G. Brockman, V. Cheung, L. Pettersson, J. Schneider, J. Schulman, J. Tang, and W. Zaremba. OpenAI gym. *arXiv:1606.01540 [cs.LG]*, June 2016.
- [9] P. Chrabaszcz, I. Loshchilov, and F. Hutter. Back to basics: Benchmarking canonical evolution strategies for playing atari. In J. Lang, editor, *Proceedings of the Twenty-Seventh International Joint Conference on Artificial Intelligence, (IJCAI’18)*, pages 1419–1426. ijcai.org, 2018.
- [10] K. Chua, R. Calandra, R. McAllister, and S. Levine. Deep reinforcement learning in a handful of trials using probabilistic dynamics models. In *Proceedings of the 31st International Conference on Advances in Neural Information Processing Systems (NeurIPS’18)*, pages 4754–4765, 2018.
- [11] K. Cobbe, C. Hesse, J. Hilton, and J. Schulman. Leveraging Procedural Generation to Benchmark Reinforcement Learning. *arXiv:1912.01588 [cs.LG]*, Dec 2019.
- [12] Gabriel Dulac-Arnold, Nir Levine, Daniel J. Mankowitz, Jerry Li, Cosmin Paduraru, Sven Goyal, and Todd Hester. An empirical investigation of the challenges of real-world reinforcement learning. *CoRR*, abs/2003.11881, 2020.



- [13] M. Fortunato, M. G. Azar, B. Piot, J. Menick, M. Hessel, I. Osband, A. Graves, V. Mnih, R. Munos, D. Hassabis, O. Pietquin, C. Blundell, and S. Legg. Noisy networks for exploration. In *Proceedings of the International Conference on Learning Representations (ICLR'18)*, 2018. Published online: [iclr.cc](https://iclr.cc).
- [14] S. Fujimoto, H. van Hoof, and D. Meger. Addressing function approximation error in actor-critic methods. In J. G. Dy and A. Krause, editors, *Proceedings of the 35th International Conference on Machine Learning (ICML'18)*, pages 1582–1591. PMLR, 2018.
- [15] R. D. Gaina, S. M. Lucas, and D. Pérez-Liébana. Tackling sparse rewards in real-time games with statistical forward planning methods. In *Proceedings of the 33rd Conference on Artificial Intelligence (AAAI'19)*, pages 1691–1698. AAAI Press, 2019.
- [16] T. Haarnoja, H. Tang, P. Abbeel, and S. Levine. Reinforcement learning with deep energy-based policies. In D. Precup and Y. W. Teh, editors, *Proceedings of the 34th International Conference on Machine Learning, (ICML'17)*, pages 1352–1361. PMLR, 2017.
- [17] T. Haarnoja, A. Zhou, P. Abbeel, and Sergey Levine. Soft Actor-Critic: Off-policy maximum entropy deep reinforcement learning with a stochastic actor. In J. G. Dy and A. Krause, editors, *Proceedings of the 35th International Conference on Machine Learning (ICML'18)*, pages 1856–1865. PMLR, 2018.
- [18] P. Henderson, R. Islam, P. Bachman, J. Pineau, D. Precup, and D. Meger. Deep reinforcement learning that matters. In S. A. McIlraith and K. Q. Weinberger, editors, *Proceedings of the Conference on Artificial Intelligence (AAAI'18)*, pages 3207–3214. AAAI Press, 2018.
- [19] D. Hendrycks and T. G. Dietterich. Benchmarking neural network robustness to common corruptions and perturbations. In *Proceedings of the International Conference on Learning Representations (ICLR'19)*, 2019. Published online: [iclr.cc](https://iclr.cc).
- [20] M. Hessel, J. Modayil, H. van Hasselt, T. Schaul, G. Ostrovski, W. Dabney, D. Horgan, B. Piot, M. Azar, and D. Silver. Rainbow: Combining improvements in deep reinforcement learning. In S. A. McIlraith and K. Q. Weinberger, editors, *Proceedings of the Conference on Artificial Intelligence (AAAI'18)*, pages 3215–3222. AAAI Press, 2018.
- [21] Alex Irpan. Deep reinforcement learning doesn't work yet. <https://www.alexirpan.com/2018/02/14/r1-hard.html>, 2018.
- [22] T. Jaakkola, S. P. Singh, and M. I. Jordan. Reinforcement learning algorithm for partially observable markov decision problems. In G. Tesauro, D. S. Touretzky, and T. K. Leen, editors, *Proceedings of the 7th International Conference on Advances in Neural Information Processing Systems (NeurIPS'95)*, pages 345–352, 1995.
- [23] Thomas Jaksch, Ronald Ortner, and Peter Auer. Near-optimal regret bounds for reinforcement learning. *J. Mach. Learn. Res.*, 11:1563–1600, 2010.
- [24] A. Juliani, A. Khalifa, V.P. Berges, J. Harper, E. Teng, H. Henry, A. Crespi, J. Togelius, and D. Lange. Obstacle Tower: A Generalization Challenge in Vision, Control, and Planning. In S. Kraus, editor, *Proceedings of the Twenty-Eighth International Joint Conference on Artificial Intelligence (IJCAI)*, pages 2684–2691. ijcai.org, Feb 2019.
- [25] Leslie Pack Kaelbling, Michael L. Littman, and Anthony R. Cassandra. Planning and acting in partially observable stochastic domains. *Artif. Intell.*, 101(1-2):99–134, 1998.
- [26] Anssi Kanervisto, Christian Scheller, and Ville Hautamäki. Action space shaping in deep reinforcement learning. In *IEEE Conference on Games, CoG 2020, Osaka, Japan, August 24-27, 2020*, pages 479–486. IEEE, 2020.
- [27] Geir Kirkebøen and Gro HH Nordbye. Intuitive choices lead to intensified positive emotions: An overlooked reason for “intuition bias”? *Frontiers in Psychology*, 8:1942, 2017.
- [28] P. Klink, H. Abdulsamad, B. Belousov, and J. Peters. Self-paced contextual reinforcement learning. In L. P. Kaelbling, D. Kragic, and K. Sugiura, editors, *3rd Annual Conference on Robot Learning, (CoRL'19)*, pages 513–529. PMLR, 2019.

- [29] Alexandre Lacoste, Alexandra Luccioni, Victor Schmidt, and Thomas Dandres. Quantifying the carbon emissions of machine learning. *arXiv preprint arXiv:1910.09700*, 2019.
- [30] Y. LeCun. Learning invariant feature hierarchies. In A. Fusiello, V. Murino, and R. Cucchiara, editors, *Computer Vision - ECCV 2012*, pages 496–505. Springer, 2012.
- [31] Y. LeCun, B. Boser, J. Denker, D. Henderson, R. Howard, W. Hubbard, and L. Jackel. Back-propagation applied to handwritten zip code recognition. *Neural Comput.*, 1(4):541–551, 1989.
- [32] Yann LeCun and Corinna Cortes. MNIST handwritten digit database. 2010.
- [33] E. Liang, R. Liaw, R. Nishihara, P. Moritz, R. Fox, K. Goldberg, J. E. Gonzalez, M. I. Jordan, and I. Stoica. RLlib: Abstractions for distributed reinforcement learning. In J. Dy and A. Krause, editors, *Proceedings of the 35th International Conference on Machine Learning (ICML’18)*, volume 80, pages 3059–3068. Proceedings of Machine Learning Research, 2018.
- [34] T. P. Lillicrap, J. J. Hunt, A. Pritzel, N. Heess, T. Erez, Y. Tassa, D. Silver, and D. Wierstra. Continuous control with deep reinforcement learning. In Y. Bengio and Y. LeCun, editors, *Proceedings of the International Conference on Learning Representations (ICLR’16)*, 2016. Published online: [iclr.cc](http://iclr.cc).
- [35] Michael L. Littman, Ufuk Topcu, Jie Fu, Charles Lee Isbell Jr., Min Wen, and James MacGlashan. Environment-independent task specifications via GLTL. *CoRR*, abs/1704.04341, 2017.
- [36] Odalric-Ambrym Maillard, Timothy A. Mann, and Shie Mannor. How hard is my mdp?" the distribution-norm to the rescue". In Zoubin Ghahramani, Max Welling, Corinna Cortes, Neil D. Lawrence, and Kilian Q. Weinberger, editors, *Advances in Neural Information Processing Systems 27: Annual Conference on Neural Information Processing Systems 2014, December 8-13 2014, Montreal, Quebec, Canada*, pages 1835–1843, 2014.
- [37] V. Mnih, A. P. Badia, M. Mirza, A. Graves, T. P. Lillicrap, T. Harley, D. Silver, and K. Kavukcuoglu. Asynchronous methods for deep reinforcement learning. In M. Balcan and K. Weinberger, editors, *Proceedings of the 33rd International Conference on Machine Learning (ICML’16)*, volume 48, pages 1928–1937, 2016.
- [38] V. Mnih, K. Kavukcuoglu, D. Silver, A. A. Rusu, J. Veness, M. G. Bellemare, A. Graves, M. A. Riedmiller, A. Fidjeland, G. Ostrovski, S. Petersen, C. Beattie, A. Sadik, I. Antonoglou, H. King, D. Kumaran, D. Wierstra, S. Legg, and D. Hassabis. Human-level control through deep reinforcement learning. *Nature*, 518(7540):529–533, 2015.
- [39] Norman Mu and Justin Gilmer. MNIST-C: A robustness benchmark for computer vision. *CoRR*, abs/1906.02337, 2019.
- [40] D. S. Nau. Pathology on game trees revisited, and an alternative to minimaxing. *Artif. Intell.*, 21(1-2):221–244, 1983.
- [41] Ronald Ortner, Pratik Gajane, and Peter Auer. Variational regret bounds for reinforcement learning. In Amir Globerson and Ricardo Silva, editors, *Proceedings of the Thirty-Fifth Conference on Uncertainty in Artificial Intelligence, UAI 2019, Tel Aviv, Israel, July 22-25, 2019*, volume 115 of *Proceedings of Machine Learning Research*, pages 81–90. AUAI Press, 2019.
- [42] I. Osband, Y. Doron, M. Hessel, J. Aslanides, E. Sezener, A. Saraiva, K. McKinney, T. Lattimore, C. Szepesvari, S. Singh, B. Van Roy, R. Sutton, D. Silver, and H. Van Hasselt. Behaviour suite for reinforcement learning. In *Proceedings of the International Conference on Learning Representations (ICLR’19)*, 2019. Published online: [iclr.cc](http://iclr.cc).
- [43] J. Pearl. Theoretical impediments to machine learning with seven sparks from the causal revolution. In Y. Chang, C. Zhai, Y. Liu, and Y. Maarek, editors, *Proceedings of the Eleventh ACM International Conference on Web Search and Data Mining, (WSDM’18)*, page 3. ACM, February 2018.

- [44] Martin L. Puterman. *Markov Decision Processes: Discrete Stochastic Dynamic Programming*. Wiley Series in Probability and Statistics. Wiley, 1994.
- [45] J. Rajendran, J. Ganhotra, S. Singh, and L. Polymenakos. Learning end-to-end goal-oriented dialog with multiple answers. In E. Riloff, D. Chiang, J. Hockenmaier, and J. Tsujii, editors, *Proceedings of the Conference on Empirical Methods in Natural Language Processing (EMNLP'19)*, pages 3834–3843. Association for Computational Linguistics, 2018.
- [46] Aravind Rajeswaran, Vikash Kumar, Abhishek Gupta, Giulia Vezzani, John Schulman, Emanuel Todorov, and Sergey Levine. Learning complex dexterous manipulation with deep reinforcement learning and demonstrations. In *Proceedings of Robotics: Science and Systems*, Pittsburgh, Pennsylvania, June 2018.
- [47] R. Ramanujan, A. Sabharwal, and B. Selman. On adversarial search spaces and sampling-based planning. In R. I. Brafman, H. Geffner, J. Hoffmann, and H. A. Kautz, editors, *Proceedings of the 20th International Conference on Automated Planning and Scheduling, (ICAPS'10)*, pages 242–245. AAAI, 2010.
- [48] J. Schulman, F. Wolski, P. Dhariwal, A. Radford, and O. Klimov. Proximal policy optimization algorithms. *arXiv:1707.06347 [cs.LG]*, 2017.
- [49] D. Silver, A. Huang, C. J. Maddison, A. Guez, L. Sifre, G. van den Driessche, J. Schrittwieser, I. Antonoglou, V. Panneershelvam, M. Lanctot, S. Dieleman, D. Grewe, J. Nham, N. Kalchbrenner, I. Sutskever, T. P. Lillicrap, M. Leach, K. Kavukcuoglu, T. Graepel, and D. Hassabis. Mastering the game of go with deep neural networks and tree search. *Nature*, 529(7587):484–489, 2016.
- [50] Elizabeth S Spelke and Katherine D Kinzler. Core knowledge. *Developmental science*, 10(1):89–96, 2007.
- [51] Jayakumar Subramanian, Amit Sinha, Raihan Seraj, and Aditya Mahajan. Approximate information state for approximate planning and reinforcement learning in partially observed systems. *CoRR*, abs/2010.08843, 2020.
- [52] R. S. Sutton and A. G. Barto. *Reinforcement learning: An introduction*. The MIT Press, second edition, 2018.
- [53] R. S. Sutton, D. Precup, and S. Singh. Between mdps and semi-mdps: A framework for temporal abstraction in reinforcement learning. *Artificial intelligence*, 112(1-2):181–211, 1999.
- [54] C. Thornton, F. Hutter, H. Hoos, and K. Leyton-Brown. Auto-WEKA: combined selection and hyperparameter optimization of classification algorithms. In I. Dhillon, Y. Koren, R. Ghani, T. Senator, P. Bradley, R. Parekh, J. He, R. Grossman, and R. Uthrusamy, editors, *The 19th ACM SIGKDD International Conference on Knowledge Discovery and Data Mining (KDD'13)*, pages 847–855. ACM Press, 2013.
- [55] S. Thrun, W. Burgard, and D. Fox. *Probabilistic robotics*. Intelligent robotics and autonomous agents. MIT Press, 2005.
- [56] Josh Tobin, Rachel Fong, Alex Ray, Jonas Schneider, Wojciech Zaremba, and Pieter Abbeel. Domain randomization for transferring deep neural networks from simulation to the real world. In *2017 IEEE/RSJ International Conference on Intelligent Robots and Systems, IROS 2017, Vancouver, BC, Canada, September 24-28, 2017*, pages 23–30. IEEE, 2017.
- [57] E. Todorov, T. Erez, and Y. Tassa. MuJoCo: A physics engine for model-based control. In *International Conference on Intelligent Robots and Systems (IROS'12)*, pages 5026–5033. IEEE, 2012.
- [58] Emma Tosch, Kaleigh Clary, John Foley, and David D. Jensen. Toybox: A suite of environments for experimental evaluation of deep reinforcement learning. *CoRR*, abs/1905.02825, 2019.
- [59] Alexander Matt Turner. Optimal farsighted agents tend to seek power. *CoRR*, abs/1912.01683, 2019.

- [60] H. van Hasselt. Double q-learning. In J. Lafferty, C. Williams, J. Shawe-Taylor, R. Zemel, and A. Culotta, editors, *Proceedings of the 24th International Conference on Advances in Neural Information Processing Systems (NeurIPS'10)*, pages 2613–2621, 2010.
- [61] T. Wang, X. Bao, I. Clavera, J. Hoang, Y. Wen, E. Langlois, S. Zhang, G. Zhang, P. Abbeel, and J. Ba. Benchmarking model-based reinforcement learning. *arXiv:1907.02057 [cs.LG]*, 2019.
- [62] Kenny Young and Tian Tian. Minatar: An atari-inspired testbed for more efficient reinforcement learning experiments. *CoRR*, abs/1903.03176, 2019.
- [63] Baohe Zhang, Raghu Rajan, Luis Pineda, Nathan Lambert, André Biedenkapp, Kurtland Chua, Frank Hutter, and Roberto Calandra. On the Importance of Hyperparameter Optimization for Model-based Reinforcement Learning. In *Proceedings of the 24th International Conference on Artificial Intelligence and Statistics (AISTATS)'21*, April 2021.
- [64] C. Zhang, S. Bengio, M. Hardt, B. Recht, and O. Vinyals. Understanding deep learning requires rethinking generalization. In *5th International Conference on Learning Representations, (ICLR'17)*. OpenReview.net, 2017.

## Checklist

1. For all authors...
  - (a) Do the main claims made in the abstract and introduction accurately reflect the paper’s contributions and scope? [Yes] The orthogonal dimension that influence RL agents performances are presented and their role in the implemented MDPs is discussed in Section 2. We showed that varying these dimensions can provide new insights or confirm existing insights (on the toy environments that also hold on more complex ones) in Section 4.2. We discussed how our proposed benchmark can aid in designing new agents by taking the proposed dimensions into account during the design (see Section 4.1). Finally, we discuss how the benchmark can help in debugging agents and could be used for continuous integration (see Section 4.3).
  - (b) Did you describe the limitations of your work? [Yes] See Section 6.
  - (c) Did you discuss any potential negative societal impacts of your work? [Yes]
  - (d) Have you read the ethics review guidelines and ensured that your paper conforms to them? [Yes]
2. If you are including theoretical results...
  - (a) Did you state the full set of assumptions of all theoretical results? [N/A]
  - (b) Did you include complete proofs of all theoretical results? [N/A]
3. If you ran experiments (e.g. for benchmarks)...
  - (a) Did you include the code, data, and instructions needed to reproduce the main experimental results (either in the supplemental material or as a URL)? [Yes] See <https://github.com/automl/mdp-playground> and the link is also given in Section 7.
  - (b) Did you specify all the training details (e.g., data splits, hyperparameters, how they were chosen)? [Yes] See Appendix P
  - (c) Did you report error bars (e.g., with respect to the random seed after running experiments multiple times)? [Yes]
  - (d) Did you include the total amount of compute and the type of resources used (e.g., type of GPUs, internal cluster, or cloud provider)? [Yes] In Section 3 we discussed the low-cost execution of experiments on MDP Playground and we provide further details along with hardware specifications in the Appendix R.
4. If you are using existing assets (e.g., code, data, models) or curating/releasing new assets...
  - (a) If your work uses existing assets, did you cite the creators? [Yes]
  - (b) Did you mention the license of the assets? [N/A]
  - (c) Did you include any new assets either in the supplemental material or as a URL? [N/A]

- 684 (d) Did you discuss whether and how consent was obtained from people whose data you're  
685 using/curating? [N/A]
- 686 (e) Did you discuss whether the data you are using/curating contains personally identifiable  
687 information or offensive content? [N/A]
- 688 5. If you used crowdsourcing or conducted research with human subjects...
- 689 (a) Did you include the full text of instructions given to participants and screenshots, if  
690 applicable? [N/A]
- 691 (b) Did you describe any potential participant risks, with links to Institutional Review  
692 Board (IRB) approvals, if applicable? [N/A]
- 693 (c) Did you include the estimated hourly wage paid to participants and the total amount  
694 spent on participant compensation? [N/A]

## A Benchmark Track Checklist

1. Submission introducing new datasets must include the following in the supplementary materials:
  - (a) Dataset documentation and intended uses. Recommended documentation frameworks include datasheets for datasets, dataset nutrition labels, data statements for NLP, and accountability frameworks. [Yes] Available in the platform’s repository: <https://github.com/automl/mdp-playground>
  - (b) URL to website/platform where the dataset/benchmark can be viewed and downloaded by the reviewers. [Yes] Available in the platform’s repository: <https://github.com/automl/mdp-playground>
  - (c) Author statement that they bear all responsibility in case of violation of rights, etc., and confirmation of the data license. [Yes] The license is an Apache license, available in the platform’s repository: <https://github.com/automl/mdp-playground>
  - (d) Hosting, licensing, and maintenance plan. The choice of hosting platform is yours, as long as you ensure access to the data (possibly through a curated interface) and will provide the necessary maintenance. [Yes] The platform’s repository is publicly hosted on GitHub and we will actively continue to maintain and develop MDP Playground further. We also welcome and support community-driven efforts such as pull request, reported issues and forum discussions.
2. To ensure accessibility, the supplementary materials for datasets must include the following:
  - (a) Links to access the dataset and its metadata. This can be hidden upon submission if the dataset is not yet publicly available but must be added in the camera-ready version. In select cases, e.g. when the data can only be released at a later date, this can be added afterward. Simulation environments should link to (open source) code repositories. [Yes] Available in the platform’s repository: <https://github.com/automl/mdp-playground>
  - (b) The dataset itself should ideally use an open and widely used data format. Provide a detailed explanation on how the dataset can be read. For simulation environments, use existing frameworks or explain how they can be used. [Yes] The documentation is available in the platform’s repository: <https://github.com/automl/mdp-playground>
  - (c) Long-term preservation: It must be clear that the dataset will be available for a long time, either by uploading to a data repository or by explaining how the authors themselves will ensure this. [Yes] The platform will be actively maintained with input from the community
  - (d) Explicit license: Authors must choose a license, ideally a CC license for datasets, or an open source license for code (e.g. RL environments). [Yes] The license is an Apache license, available in the platform’s repository: <https://github.com/automl/mdp-playground>
  - (e) Add structured metadata to a dataset’s meta-data page using Web standards (like schema.org and DCAT): This allows it to be discovered and organised by anyone. If you use an existing data repository, this is often done automatically. [N/A]
  - (f) Highly recommended: a persistent dereferenceable identifier (e.g. a DOI minted by a data repository or a prefix on identifiers.org) for datasets, or a code repository (e.g. GitHub, GitLab,...) for code. If this is not possible or useful, please explain why. [Yes] GitHub repository: <https://github.com/automl/mdp-playground>
3. For benchmarks, the supplementary materials must ensure that all results are easily reproducible. Where possible, use a reproducibility framework such as the ML reproducibility checklist, or otherwise guarantee that all results can be easily reproduced, i.e. all necessary datasets, code, and evaluation procedures must be accessible and documented. [Yes] The experiments adhere to the ML reproducibility checklist at: <https://arxiv.org/abs/2003.12206>
4. For papers introducing best practices in creating or curating datasets and benchmarks, the above supplementary materials are not required. [N/A]

## B Dimensions in MDP Playground

We list here the dimensions for *MDP Playground*. Details on each dimension can be found in the documentation for the class `mdp_playground.envs.RLToyEnv` in the accompanying code.

- Reward Delay
- Rewardable Sequence Length
- Reward Sparsity
- $P$  Noise
- $R$  Noise
- Irrelevant Features
- Transforms for Representation Learning
- Reward Shift
- Reward Scale
- State space size/dimensionality
- Action space size/dimensionality
- Terminal State Density
- Terminal State Reward
- Relevant Dimensions (for both state and action spaces)
- \* Only for discrete environments:
  - Diameter
  - Reward Distribution
  - Image Representations
  - \* Only for Image Representations:
    - Shift Quantisation
    - Scale Range
    - Rotation Quantisation
- \* Only for continuous environments:
  - Target Point
  - Target Radius
  - Time Unit
  - Inertia
  - State Space Max
  - Action Space Max
  - Transition Dynamics Order
  - Reward Function
- \* Currently fixed dimensions:
  - Initial State Distribution

### B.1 More exposition on the dimensions in MDP Playground

We also mention here the  $Q^*$ -value [38] and use it as an example to argue how violations of assumptions may lead to degradation in performance. For a state  $s$  and action  $a$ , a policy  $\pi$  and  $r_t$  the reward a timestep  $t$ ,  $Q^*$  is defined as:  $Q^*(s, a) = \max_{\pi} \mathbb{E} [\sum_{t=0}^{\infty} \gamma^t r_t | s_t = s, a_t = a, \pi]$ .

For many environments, in many situations, agents perform an action that is consequential to receiving a reward but the agent is only rewarded in a *delayed* manner [see e.g. 4]. For example, shooting at an enemy ship in *Space Invaders* leads to rewards much later than the action of shooting. Any action taken after that is inconsequential to obtaining the reward for destroying that enemy ship. Regarding the  $Q^*$  value, this means that if an incorrect information state is used, then updates performed for approximating  $Q^*$  will tend to assign partial credit also to inconsequential actions.

In many environments, a reward is obtained for a *sequence* of actions taken and not just the information state and action. A simple example is executing a tennis serve, where one needs a sequence of actions which results in a point, e.g., if an ace was served. In contrast to *delayed rewards*, rewarding a sequence of actions addresses the actions taken which are consequential to obtaining a reward. [53] present a framework for temporal abstraction in RL to deal with such sequences. Regarding the  $Q^*$  value, this means that if an incorrect information state is used, then updates performed for approximating  $Q^*$  will tend to assign partial credit also to incomplete sequences. The agent may not realise that a whole sequence of actions is needed to be taken and not just some of them. While agents



can converge asymptotically in the face of both delays and sequences, using the correct information state would lead to much better sample efficiency and more stable learning. In *MDP Playground*, for discrete environments, only specific sequences of states of positive integer length  $n$  are rewardable. Sequences consist of non-repeating states allowing for  $\frac{(|S|-|T|)!}{(|S|-|T|-n)!}$  sequences. For the continuous environment of moving to a target,  $n$  is variable.

Environments can also be characterised by their *reward density*. In sparse reward settings [15], the supervisory reward signal is 0 throughout the trajectory and then a single non-zero reward is received at its end. This also holds true for the example of the tennis serve above.

The *diameter* of an MDP, i.e., the maximum distance between 2 states, is another significant dimension affecting performance and reachability of states [23, 41]. If rewarding states are very far apart, then an agent would get less reward on average. In *MDP Playground*, for discrete environments, for *diameter* =  $d$ , the set of states is set to be a  $d$ -partite graph, where, if we order the  $d$  sets as 1, 2, ...,  $d$ , states from set  $n$  will have actions leading to states in set  $n + 1$ , with the final set  $d$  having actions leading to states in set 1. The number of actions for each state will, thus, be  $(\text{number of states})/(d)$ . This gives the discrete environments a grid-world like structure. For continuous environments, setting the dimension *state space max* sets the bounds of the environment to  $\pm \text{state space max}$  and the *diameter* =  $2\sqrt{2} \text{ state space max}$ .

Further, an additional dimensions for continuous control problems we implement is *target radius* for the task of reaching a target: we have *target radius* [see, e.g., 28], a measure of the distance from the target within which we consider the target to have been successfully reached.

We now mathematically highlight some of our dimensions of hardness to aid understanding. The information state of an agent to compute an optimal policy would need to stack the previous  $n + d$  observation and action pairs from the environment where  $n$  denotes a *sequence length* and  $d$  denotes a *delay*, i.e., a sequence of actions needs to be followed to obtain a reward which may be delayed by a certain number of steps. Reward density controls the fraction of elements in  $S^n$  that are rewardable.

Additionally, the continuous control dimensions can mathematically be described as follows. The *target radius* sets  $T = \{s \mid \|s - s_t\|_2 < \text{target radius}\}$ , where  $s_t$  is the target point. The *action range* sets  $A \subset \mathbb{R}^a$  where  $a$  is the action space dimensionality. The *time unit*,  $t$ , sets  $P(s, a) = s + \int_t P_{\text{cont}}(s, a) dt$  where  $P_{\text{cont}}$  is the underlying continuous dynamics function. The *transition dynamics order*,  $n$ , sets  $P$  to be in  $C^n$ , the set of functions differentiable  $n$  times.

## B.2 Additional density option for sequences

With regard to density, recall the tennis serve again. The point received by serving an ace would be a sparse reward. We as humans know to reward ourselves for executing only a part of the sequence correctly. Rewards in continuous control tasks to reach a target point [e.g. in Mujoco, 57], are usually dense (such as the negative squared distance from the target). This lets the algorithm obtain a dense signal in space to guide learning, and it is well known [52] that it would be much harder for the algorithm to learn if it only received a single reward at the target point. The environments in MDP Playground have a configuration option, *make\_denser*, to allow this kind of reward shaping to make the reward denser and observe the effects on algorithms. To achieve this, when *make\_denser* is *True*, the environment gives a fractional reward if a fraction of a rewardable sequence is achieved in discrete environments. For continuous environments, for the move to a target point reward function, this option toggles between giving a dense reward as described in the main paper and giving a sparse reward when the agent is within the *target radius*.

## C Algorithm for generating MDPs

---

**Algorithm 1** Automatically Generated MDPs with MDP Playground
 

---

```

1: Input:
2: reward delay  $d$ ,
3: rewardable sequence length  $n$ ,
4: transition noise  $t_n$  or  $\sigma_{t_n}$ ,
5: reward noise  $\sigma_{r_n}$ ,
6: reward_scale,
7: reward_shift,
8: term_state_reward,
9: make_denser,
10: relevant_dimensions
11:                                     ▷ Dimensions specific to discrete environments
12: number of states  $|S|$ ,
13: diameter,
14: reward density  $rd$ ,
15: terminal_state_density,
16: reward distribution reward_dist
17:                                     ▷ Dimensions specific to continuous environments
18: target_point,
19: target_radius,
20: transition_dynamics_order,
21: time_unit,
22: inertia
23:
24: function INIT_TRANSITION_FUNCTION():
25:   if discrete environment then
26:     Set  $|A| = |S|/diameter$ 
27:     Divide  $S$  into independent sets  $S_i$  with  $|A|$  elements in each with  $i = 1, 2, \dots, diameter$ 
28:     for each independent set  $S_i$  do
29:       for each state  $s$  in  $S_i$  do
30:         Set possible successor states:  $S' = S_{i+1}$ 
31:         for each action  $a$  do
32:           Set  $P(s, a) = s'$  sampled uniformly from  $S'$  and remove  $s'$  from  $S'$ 
33:       if irrelevant features then
34:         Generate dynamics  $P_{irr}$  of irrelevant part of state space as was done for  $P$ 
35:   else
36:     Do nothing as continuous environments have a fixed parameterisation
37:
38: function INIT_REWARD_FUNCTION( $n$ ):
39:   if discrete environment then
40:     Randomly sample  $rd * \frac{(|S|-|T|)!}{(|S|-|T|-n)!}$  and store in rewardable_sequences with corresponding reward sampled according to reward_dist if enabled
41:     ▷ The actual formula is more complicated because of the diameter
42:     ▷ Only those sequences are sampled which are legal according to  $P$ 
43:   else
44:     Do nothing as continuous environments have fixed options for the reward function
45:

```

---

---

```

46: function TRANSITION_FUNCTION( $s, a$ ):
47:   if discrete environment then
48:      $s' = P(s, a)$ 
49:     if  $\mathcal{U}(0, 1) < t\_n$  then
50:        $s' = \text{a random state in } S \setminus \{P(s, a)\}$  ▷ Inject noise
51:     Observation  $o = s'$ 
52:     if irrelevant features then
53:       Execute dynamics  $P_{irr}$  of irrelevant part of state space and concatenate with  $s'$  to get
       observation  $o$ 
54:     if representation learning then
55:        $o = \text{image of corresponding polygon(s) with applied selected transforms}$ 
56:     else
57:       Set  $n = \text{transition\_dynamics\_order}$ 
58:       Set  $a^n = a$  ▷ Superscript  $n$  represents  $n^{th}$  derivative
59:       Set  $s^n = a^n / inertia$  ▷ Each state dimension is controlled by each action dimension
60:       for  $i$  in reversed(range( $n$ )) do
61:         Set  $s_{t+1}^i = \sum_{j=0}^{n-i} s_t^{i+j} \cdot \frac{1}{j!} \cdot time\_unit^j$  ▷  $t$  is current time step.
62:          $s_{t+1} += \mathcal{N}(0, \sigma^2_{t\_n})$ 
63:          $o = s_{t+1}$ 
64:       return  $o$ 
65:
66: function REWARD_FUNCTION( $s, a$ ):
67:    $r = 0$ 
68:   if irrelevant features then
69:      $s = s[\text{relevant\_dimensions}]$  ▷ Select the part of state space relevant to reward
70:   if discrete environment then
71:     if not make_denser then
72:       if state sequence  $ss$  of  $n$  states ending  $d$  steps in the past is in
       rewardable_sequences then
73:          $r = \text{rewardable\_sequences}[ss]$ 
74:       else
75:         for  $i$  in range( $n$ ) do
76:           if sequence of  $i$  states ending  $d$  steps in the past is a prefix sub-sequence of a
           sequence in rewardable_sequences then
77:              $r += i/n$ 
78:       else
79:          $r = \text{Distance moved towards the target\_point}$ 
80:          $r += \mathcal{N}(0, \sigma^2_{r\_n})$ 
81:          $r *= \text{reward\_scale}$ 
82:          $r += \text{reward\_shift}$ 
83:       if reached terminal state then
84:          $r += \text{term\_state\_reward}$ 
85:       return  $r$ 
86:
87: function MAIN():
88:   INIT_TERMINAL_STATES() ▷ Set  $T$  according to terminal\_state\_density
89:   INIT_INIT_STATE_DIST() ▷ Set  $\rho_o$  to uniform distribution over non-terminal states
90:   INIT_TRANSITION_FUNCTION()
91:   INIT_REWARD_FUNCTION()

```

---

## 846 D More on Related Work

847 Many of the other benchmarks mentioned in the main paper are largely vision-based, which means  
848 that a large part of their problem solving receives benefits from advances in the vision community  
849 while our benchmarks try to tackle pure RL problems in their most toy form. This also means that  
850 our experiments are extremely cheap, making them a good platform to test out new algorithms’  
851 robustness to different challenges in RL.

852 A parallel and independent work along similar lines as the MDP Playground, which was released a  
853 month before ours on arXiv, is the Behaviour Suite for RL (bsuite, [42]). In contrast to our *generated*  
854 benchmarks, that suite *collects* simple RL benchmarks from the literature that are representative  
855 of various types of problems which occur in RL and tries to characterise RL algorithms. Unlike  
856 their framework, where currently there is no toy environment for Hierarchical RL (HRL) algorithms,  
857 the rewardable sequences that we describe also fits very well with HRL. Additionally, we also  
858 have toy continuous environments whereas bsuite currently only has discrete environments. They  
859 also do not generate completely random  $P$  and  $R$  for their environments like we do, which would  
860 help avoid algorithms overfitting to certain benchmarks. An important distinction between the two  
861 platforms could be summed up by saying that they try to characterise *algorithms* while we try to  
862 characterise *environments* with the aim that new adaptable algorithms can be developed that can  
863 tackle environments of desired difficulty.

864 [36] defines a novel theoretical metric for defining hardness of MDPs. It captures difficulties within  
865 MDPs when the true state of the MDP is known. However, a large part of the hardness in our MDPs  
866 comes from the agent not knowing the optimal information state to use. It’d be interesting to design a  
867 metric which captures this aspect of hardness as well.

868 Our platform allows formulating problems in terms of the identified dimensions and we feel this is a  
869 very human-understandable way of defining problems or specifying tasks. [35] defines a Geometric  
870 Linear Temporal Logic (GLTL) specification language to formally specify tasks for MDPs and RL  
871 environments. They also share our motivation in making it easier and more natural to specify tasks.

872 For some readers, it might feel obvious that injecting many of these dimensions causes difficulties  
873 for agents. However, to the best of our knowledge, no other work has tried to collect all *orthogonal*  
874 dimensions in one place and study them comprehensively and what aspects transfer from toy to more  
875 complex environments.

876 The nature of the toy environments is one of high bias. We believe that the *transfer* of the hardness  
877 dimensions from toy to complex environments occurs because the algorithms we have tested are  
878 environment agnostic and usually do not take aspects of the environment into account. Q-learning for  
879 instance is based on TD-errors and the Bellman equation. The equation is agnostic to the environment  
880 and while adding deep learning may help agents learn representations better, it does not remove the  
881 problems inherent in deep learning. While it’s nice to have general algorithms that may be applied in  
882 a black box fashion, by studying the dimensions we have listed and their effects on environments, we  
883 gain deeper insights into what is needed to design better agents.

884 An additional comment can be made about comparing the continuous and discrete complex environ-  
885 ments comparisons to the toy benchmarks. The "noise" in comparing the toy and complex discrete  
886 environments was higher compared to the continuous toy and complex environments and we believe  
887 this is due to the discrete environments being much more sparse and having many more *lucky areas*  
888 that can be exploited as with the *qbert* bug and *breakout* strategy mentioned. In comparison, continu-  
889 ous environments usually employ a dense reward formulation in which case the value functions are  
890 likely to be continuous.

891 Algorithms like DQN [38] have been applied to many varied environments and produce very variable  
892 performance across these. In some simple environments, DQN’s performance exceeds human  
893 performance by large amounts, but in other environments, such as Montezuma’s revenge, performance  
894 is very poor. For some of these environments, e.g. Montezuma’s revenge, we need a very specific  
895 sequence of actions to get a reward. For others, there are different delays in rewards. A problem  
896 with evaluating on these environments is that we have either no control over their difficulty or little  
897 control such as having different difficulty levels. But even these difficulty levels, do not isolate the  
898 confounding factors that are present at the same time and do not allow us to control the confounding  
899 factors *individually*. We make that possible with our dimensions.

**MDP Playground in relation to MNIST** MNIST [32] captured some key difficulties required for computer vision (CV) which made it a good testbed for designing and debugging CV algorithms - even the webpage for the dataset mentions some distortions to inject hardness for MNIST: *distortions are random combinations of shifts, scaling, skewing, and compression*. [39] captures 15 such distortions to benchmark out-of-distribution robustness in computer vision. However, being a good testbed does not mean that MNIST can be used to directly learn models for much more specific CV applications such as classification of plants or medical image analysis. It captures many aspects that are general to CV problems but not specific ones.

When designing the platform, we went over the components of an MDP and tried to exhaustively add as many parameterisable dimensions as possible with the condition that they are all *orthogonal* and can be applied independently of each other. In a sense, this is an attempt to capture fundamental dimensions of hardness in the same way that human cognition is founded, in part, on four different systems and endow humans with abstract reasoning abilities [50]. We don't try to capture, say credit assignment or generalisation as dimensions. These are to be dealt with at a higher level the same way that intelligent behaviour and reasoning arise from the interplay of different underlying cognitive systems which process objects or space at a lower sensory level.

## E More on Designing New agents

**Varying action range** Since the insights into the environments for this dimension were similar to the insights for the *time unit*, the design ideas for an agent robust to this dimension follow a similar vein as for the *time unit*. An ideal adaptive agent design would set the *action range* in an online manner. A new basic agent design could do this once at the beginning of training and set its optimal *action range*.

**Varying reward delay** Since it's clear (see Figure 12 and discussion in Appendix J) that not having the Markov state as the information state can lead to a significant drop in performance, a simple tabular agent design could incorporate delays into its formulation. For instance, one could formulate the  $Q$ -value as being over multiple possible previous states and actions and then take the estimate of delay to be the value for which the  $Q$ -values are maximised for different state-action pairs.

**Varying transition noise** Noise also has an adverse effect on the performance of agents (see Figure 13 and discussion in Appendix J). A simple model-based RL agent design that learns a probabilistic model could adaptively estimate the noise in the transitions by repeatedly measuring the same state-action pair's transitions. This would give it an estimate of the aleatoric uncertainty. The agent could then choose to stop learning its dynamics model once the uncertainty in its model is close to the estimated aleatoric uncertainty. This would save it from further computational expenses.

## F More on Debugging Agents

We discuss here further the 2 examples of how the toy environments helped us debug RL algorithms in practice.

When merging some of our environments into bsuite, we noticed that when we varied sparsity, the performance of their DQN agent would go down in proportion to the environment's sparsity. This did not occur for other agents. This seemed to suggest something different for the DQN agent and when we looked at DQN's hyperparameters we realised that it had a fixed  $\epsilon$  schedule. While that may be desirable in some situations, we felt it hurt DQN's performance because it was not allowed to explore enough early on nor exploit what it learnt fully later. When we use regular structured environments, the agent performances are freed of the "noise" that is present due to irregular transition functions and this makes it easy to see high-level trends.

When we were performing the complex environment experiments for Atari (using Ray 0.9.0 as explained in Appendix P), we noticed that there was no learning for Rainbow even though DQN learned. We debugged this by ablating the various additions to Rainbow when compared to DQN. We ran these ablations on the *image representations* toy environment of *MDP Playground* and observed (see Figure 5) that all ablations, apart from turning noisy nets off, performed poorly. This let us quickly debug that noisy nets was broken in Ray 0.9.0.

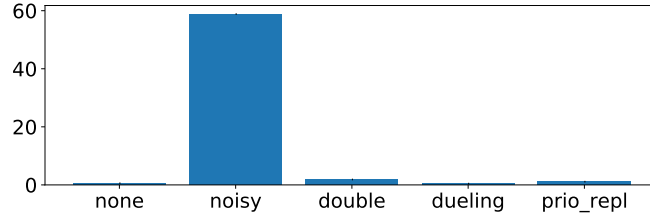

Figure 5: Ablations of Rainbow on *image representations* environments. Note the different y-axis scales.

950 Another example of how hard it can be to debug RL agents can be found in this GitHub issue for  
 951 bsuite: <https://github.com/deepmind/bsuite/issues/20>

## 952 G Design Decisions

953 **Discrete environment generation** Once the values for the dimensions are set, for the case of auto-  
 954 generated discrete environments,  $P$  is generated by selecting for each state  $s$  in independent set  $i$ ,  
 955 for each action  $a$ , a random successor state  $s'$  from independent set  $i + 1$ . This results in a *regular*  
 956 grid-world like structure for  $P$ . For  $R$ , we select the  $num_r$  rewardable sequences randomly for a  
 957 given reward density  $rd$  based on all the sequences possible under the generated  $P$ . The main reason  
 958 for unit testing in this manner is that all the RL agents we are aware of do not themselves take the  
 959 structure of the environment into account and are designed for general  $P$ s and  $R$ s. Because of this,  
 960 once the toy environment's dimensions are set, the structure of the environment is set and the agents  
 961 should show similar behaviour on all such environments and this is exactly what we observed in our  
 962 experiments when run with different seeds for the environment generation.

963 A second reason a regular structure is imposed on  $P$  is that it is always possible to design *adversarial*  
 964  $P$ s [40, 47] which can be made arbitrarily hard to solve. Suppose there is an environment where a  
 965 large reward is placed in an unknown and deliberately unexpected location. Then, evaluating an agent  
 966 on such an environment clearly does not give us a proper measure of the agent's performance. This  
 967 is, in some cases, also a problem with many complex environments, e.g., *HalfCheetah* has a bug that  
 968 allows the agent to reach infinite speed and obtain enormous rewards [63]. *qbert* has a bug which  
 969 allows the agent to achieve a very large number of points [9]. *breakout* has a scenario where, if an  
 970 agent creates a hole through the bricks, it can achieve a very large number of points. Even though the  
 971 latter *can* be a sign of desired behaviour, it skews the distribution of rewards and introduces variance  
 972 in the evaluation. There is the additional danger that the blackbox nature of complex environments  
 973 can lead researchers to draw inferences that may be biased by their intuition [27]. For example, the  
 974 agent strategy of creating a tunnel to target bricks in the top for *breakout* has been challenged multiple  
 975 times [5, 58]. As [21] sums it up: *If my reinforcement learning code does no better than random, I*  
 976 *have no idea if it's a bug, if my hyperparameters are bad, or if I simply got unlucky*. Thus, having  
 977 a very complex  $P$  or  $R$  itself can introduce "noise" into the evaluation of agents and require many  
 978 iterations of training before we can see the agent learning. We leave this for complex benchmarks to  
 979 capture as they are closer to real world use cases. For unit testing, especially, one needs quick insights  
 980 on vanilla environments and thus, it is beneficial to have what we term high *bias* environments to test  
 981 whether agents are learning.

982 The third reason a *more* regular structure is imposed as opposed to the usual gridworld is that, though,  
 983 semantically meaningful, such gridworlds have small irregularities around edges which makes them  
 984 hard to keep consistent with all the other dimensions and begins to introduce the kind of "noise" that  
 985 was discussed for more complex environments above.

986 **Dimensions** While the aim is to be as objective as possible while selecting the dimensions, a few  
 987 subjective ones were included such as *action loss weight*, which penalises action magnitudes in  
 988 continuous environments and is a very common use-case [8].

989 As some subjective design decisions were imposed on the auto-generated environments, users can  
 990 also define their own  $P$ s and  $R$ s, e.g., as transition matrices or Python functions. However, it is

991 important to note here that the user does *not* need to take care of injecting the dimensions in this case,  
992 as these are handled by *MDP Playground*, wherever possible.



## H Effect of dimensions on more complex benchmarks

Table 1: Spearman Rank Correlations for performance on toy and complex environments across different amounts of the dimension injected: **transition noise**

| Environment/Agent     | DQN                 | Rainbow             | A3C                 |
|-----------------------|---------------------|---------------------|---------------------|
| <i>beam_rider</i>     | r=0.9, pvalue=0.037 | r=0.7, pvalue=0.188 | r=0.9, pvalue=0.037 |
| <i>breakout</i>       | r=1.0, pvalue=1e-24 | r=1.0, pvalue=1e-24 | r=0.9, pvalue=0.037 |
| <i>qbert</i>          | r=0.9, pvalue=0.037 | r=0.9, pvalue=0.037 | r=0.7, pvalue=0.188 |
| <i>space_invaders</i> | r=0.9, pvalue=0.037 | r=0.7, pvalue=0.188 | r=0.9, pvalue=0.037 |

Table 2: Spearman Rank Correlations for performance on toy and complex environments across different amounts of the dimension injected: **reward delay**

| Environment/Agent     | DQN                 | Rainbow             | A3C                 |
|-----------------------|---------------------|---------------------|---------------------|
| <i>beam_rider</i>     | r=0.8, pvalue=0.104 | r=0.4, pvalue=0.504 | r=0.6, pvalue=0.284 |
| <i>breakout</i>       | r=0.0, pvalue=1.0   | r=0.3, pvalue=0.623 | r=0.8, pvalue=0.104 |
| <i>qbert</i>          | r=0.6, pvalue=0.284 | r=0.4, pvalue=0.504 | r=0.9, pvalue=0.037 |
| <i>space_invaders</i> | r=0.9, pvalue=0.037 | r=0.9, pvalue=0.037 | r=0.8, pvalue=0.104 |

Table 3: Spearman Rank Correlations for performance on toy and complex environments across different amounts of the dimension injected: **reward noise**

| Environment/Agent     | DQN                 | Rainbow             | A3C                 |
|-----------------------|---------------------|---------------------|---------------------|
| <i>beam_rider</i>     | r=0.9, pvalue=0.037 | r=0.9, pvalue=0.037 | r=0.7, pvalue=0.188 |
| <i>breakout</i>       | r=0.8, pvalue=0.104 | r=0.9, pvalue=0.037 | r=0.9, pvalue=0.037 |
| <i>qbert</i>          | r=0.4, pvalue=0.504 | r=0.5, pvalue=0.391 | r=0.5, pvalue=0.391 |
| <i>space_invaders</i> | r=0.9, pvalue=0.037 | r=0.7, pvalue=0.188 | r=0.7, pvalue=0.188 |

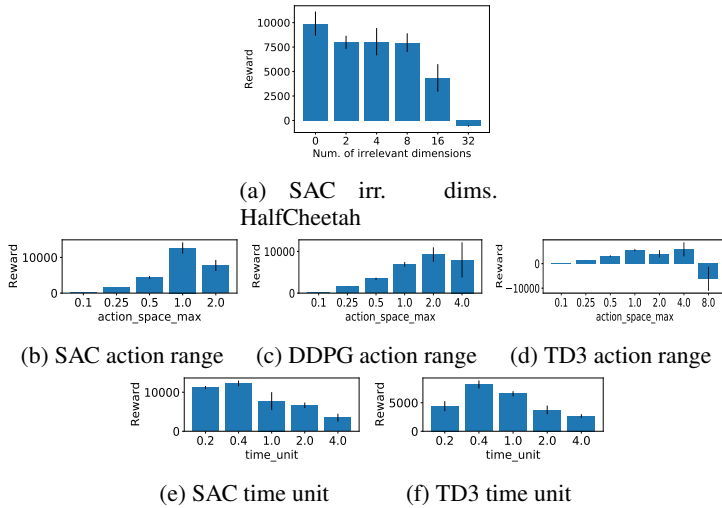

Figure 9: AUC of episodic reward at the end of training on HalfCheetah **varying action range or time unit**. Error bars represent 1 standard deviation. Note the different y-axis scales.

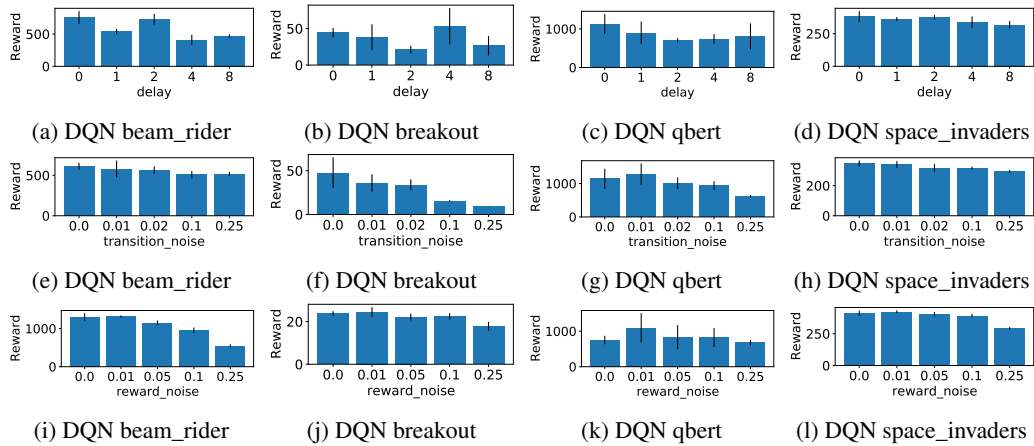

Figure 6: AUC of episodic reward for DQN on various environments at the end of training. Error bars represent 1 standard deviation. Note the different y-axis scales.

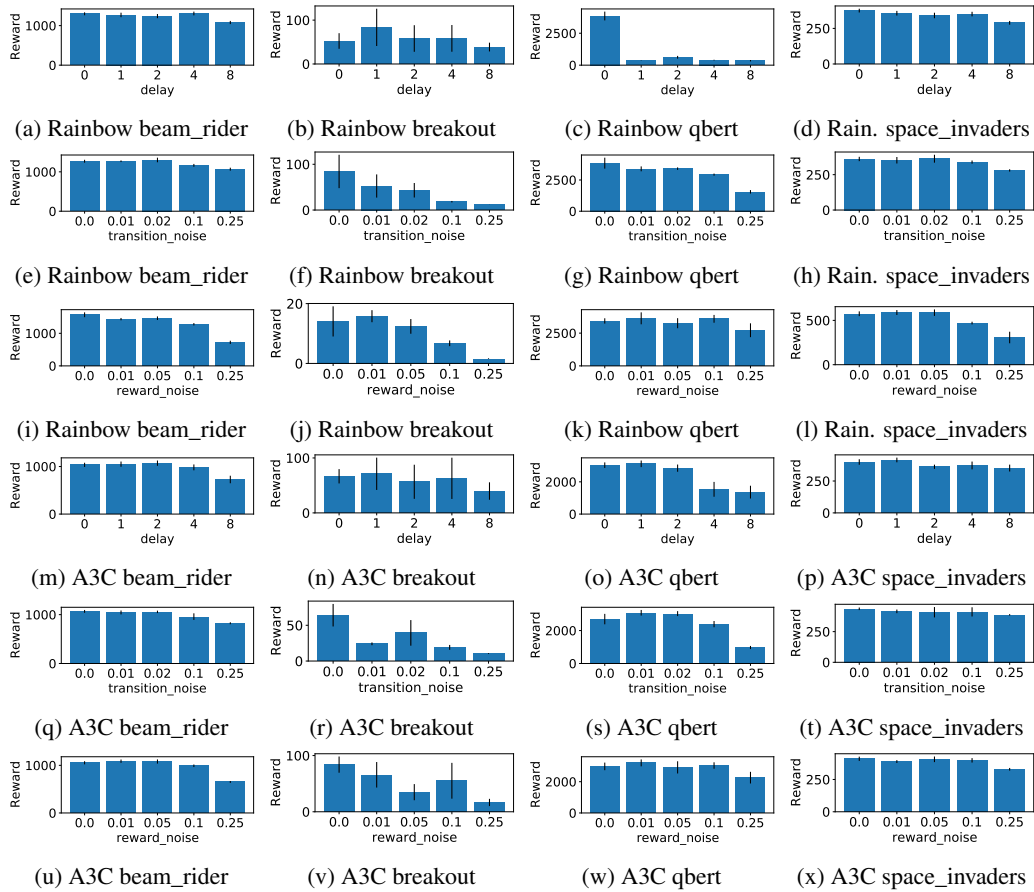

Figure 7: AUC of episodic reward for agents at the end of training for A3C and Rainbow. Error bars represent 1 standard deviation. Note the different y-axis scales.

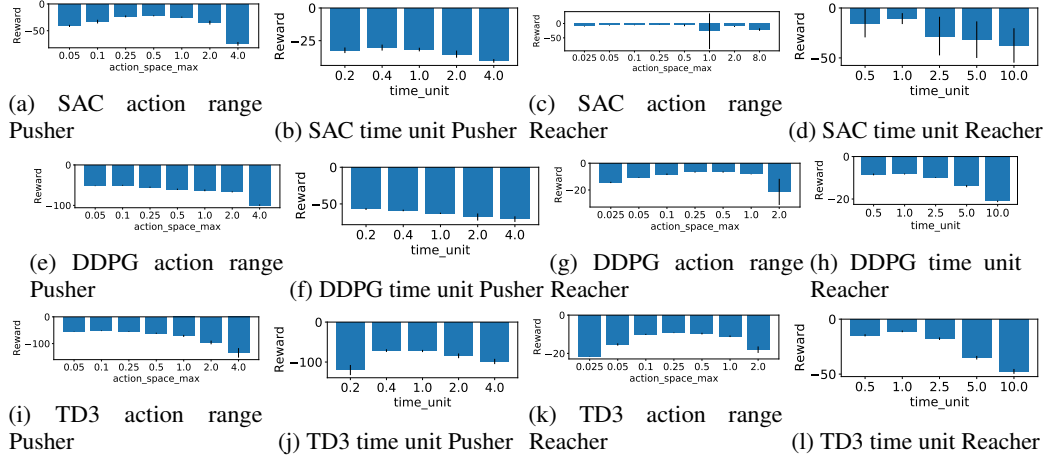

Figure 8: AUC of episodic reward at the end of training on Pusher and Reacher environments **varying action max** and **time unit**. Error bars represent 1 standard deviation. Note the different y-axis scales.

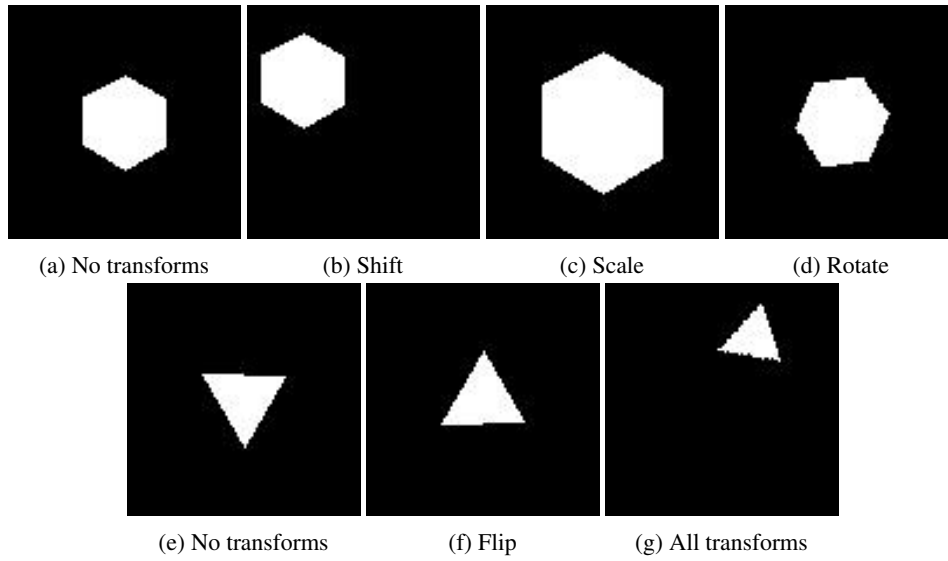

Figure 10: When using the dimension *representation learning* in discrete environments, each categorical state corresponds to an image of a polygon (if the states were numbered beginning from 0, each state  $n$  corresponds to a polygon with  $n + 3$  sides). Various transforms can be applied to the polygons randomly at each time step. Samples shown correspond to states 3 and 0

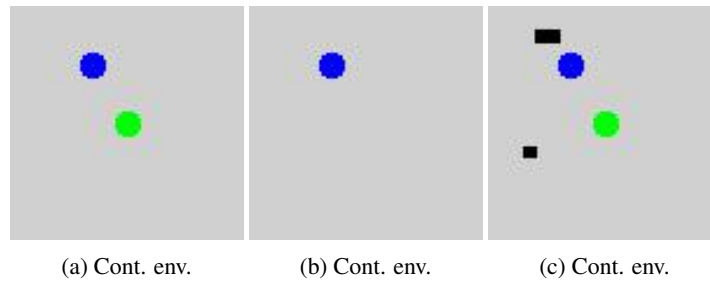

Figure 11: When using the dimension *representation learning* in continuous environments, the agent is shown as a blue circle, the target point as a green circle and terminal states are black

## J More Experiments and Additional Reward Plots

We continue with the experiments and results from the main paper here.

### J.1 Discrete environments

#### Varying reward delay

Figures 12a-c, depict the mean and standard deviation over 10 runs for various *delays*. One run consists of 10 random seeds for the algorithm but uses a fixed seed for the environment. We plot the Area Under the Curve (AUC) which takes the mean over previous training rewards. As can be seen from the figure, all algorithms perform very well in the *vanilla environment* where the MDP is fully observable as the information state of the agent is equal to the MDP's state. For all algorithms, performance degrades more as the information state is non-Markov. Performance clearly degrades more as the information state needed to compute the optimal policy requires more observations to be stacked. It is interesting (and expected) that Rainbow DQN is somewhat more robust than DQN. The plots also show that DQN variants are more robust to *delay* as compared to A3C variants.

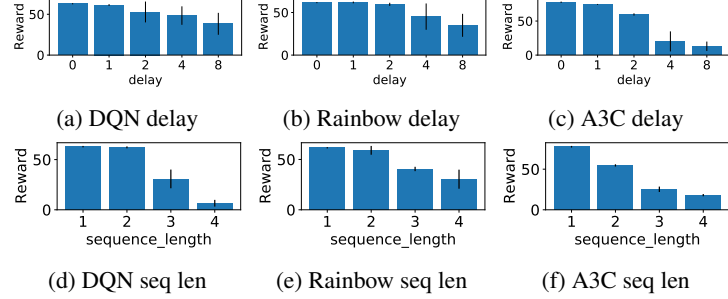

Figure 12: AUC of episodic reward at the end of training for different agents for varying **delays** (top) and **sequence lengths** (bottom). Error bars represent 1 standard deviation. Note the reward scales.

**Varying rewardable sequence length** Results here are qualitatively similar to the ones for delay. However, we observe in Figures 12d-f that sequence length has a more drastic effect in terms of degradation of performance. The improvements of Rainbow DQN over DQN are also more pronounced for these harder problems.

#### Results for varying transition and reward noises

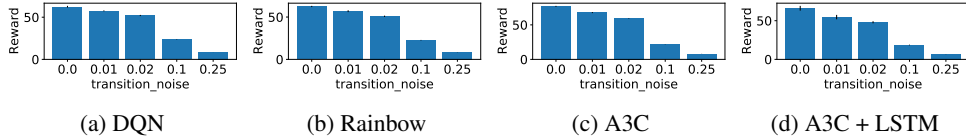

Figure 13: Mean episodic reward at the end of training for the different algorithms **when varying transition noise**. Error bars represent 1 standard deviation. Note the different reward scales.

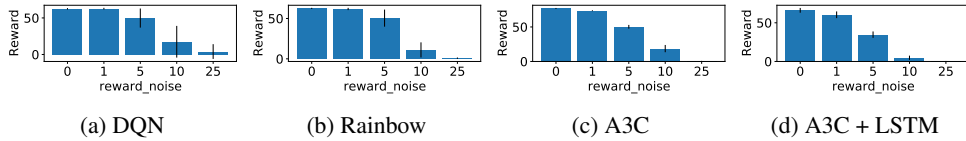

Figure 14: Mean episodic reward at the end of training for the different algorithms **when varying reward noise**. Error bars represent 1 standard deviation. Note the different reward scales.

We see a similar trend during *training*, as for delays and sequences, when we vary the *transition noise* in Figure 13 and the *reward noise* in Figure 14. Performance degrades gradually as more and more noise is injected. It is interesting that, during training, all the algorithms seem to be more sensitive to noise in the transition dynamics compared to the reward dynamics: transition noise values as low as

0.02 lead to a clear handicap in learning while for the reward dynamics (with the *reward scale* being 1.0) reward noise standard deviation of  $\sigma_{r\_n} = 1$  still resulted in learning progress.

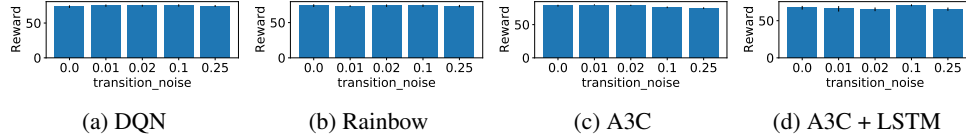

Figure 15: Mean episodic reward for evaluation rollouts (limited to 100 timesteps) at the end of training for the different algorithms **when varying transition noise**. Error bars represent 1 standard deviation.

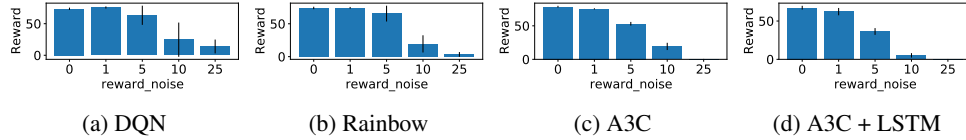

Figure 16: Mean episodic reward for evaluation rollouts (max 100 timesteps) at the end of training for the different algorithms **when varying reward noise**. Error bars represent 1 standard deviation. Note the different reward scales.

Interestingly, when we plot the *evaluation* performances<sup>1</sup> in Figures 15 and 16, we see, on comparing with the training plots, that the training performance of the algorithms is more sensitive to noise in the transition dynamics (Figure 13) than the eventual evaluation performance is (Figure 15). While it is obvious that the mean episodic reward during training would be perturbed when noise is injected into the *reward* function, it is non-trivial that injecting noise into the *transition* function still leads to good learning (as displayed in the evaluation rollout plots). An additional seeming anomaly is that the evaluation rollouts for A3C variants especially (and DQN to a small extent), suggest that it performs *better* in the presence of transition noise. This might indicate that A3C in the presence of no transition noise does not explore enough (as was also conjectured in the unexpected results for varying the sparsity meta-feature) and is actually helped when transition noise is present during training.

## J.2 Continuous Environments

We set the state and action space dimensionalities to 2. The state space range for each dimension was  $[-10, 10]$  while the default action space range was  $[-1, 1]$ . The task would terminate when an algorithm would reach the *target point*, or after at most 100 timesteps. We focus on results for DDPG as results for TD3 and SAC are qualitatively similar (see Appendix J).

**Varying action range** We observed that the total reward gets worse for action  $max > 1$ . Up until the value of 1, the episode lengths decreased as we would desire (see Figures 17b & 17d). This can be attributed to the fact that the exploration schedules for the studied agents take the max range available and explore based on that. But, as can be seen from these results, tuning these ranges or adapting exploration mechanisms can produce substantially better results.

**Varying target radius** The *target radius* is a value which is generally set to a small enough value to be able to say that the algorithm has reached the target. However, we noticed that, for small values, all the continuous control agents oscillated around the target to reach it exactly. This can be observed in Figure 17a and 17c, where we note that even though the task *was* learnt for different *target radii*, the episode lengths were shorter for larger radii as the agents kept oscillating outside the radius. Even for such a simple task all evaluated algorithms failed to adapt to performing fine-grained control near the target. We hypothesise that the agents did not learn to slow down close to the goal. Given more experience close to the goal, we expect the agents to be able to learn this behaviour.

As we mentioned earlier, one of the advantages of our platform is that it allows us to introduce all the hardness dimensions on the same base environment at the same time. This is helpful to understand

<sup>1</sup>Here, for evaluation, and not for training because training is *in* the noisy environment, we evaluated in the corresponding environment without noise to assess how well the *true* learning is proceeding.

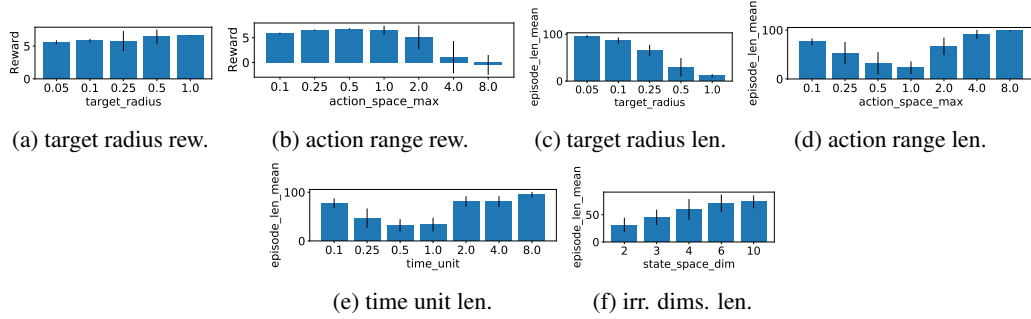

Figure 17: AUC of episodic reward (top) and lengths (bottom) for DDPG at the end of training. Error bars represent 1 standard deviation. Note the different y-axis scales.

interaction effects between them. We plot the most interesting interaction effects in Figure 18 where we varied both transition and reward noise over respective grid values. This plot shows that our observation, that transition noise helps A3C out during *evaluation*, is only clearly valid when the reward noise is not so high ( $\sigma_{r_n} \leq 1$ ) as to disrupt training. The corresponding heatmap plot for training when varying the noises and additional ones for jointly varying delay and rewardable sequence length are present in the Appendix (Figures 37 - 39).

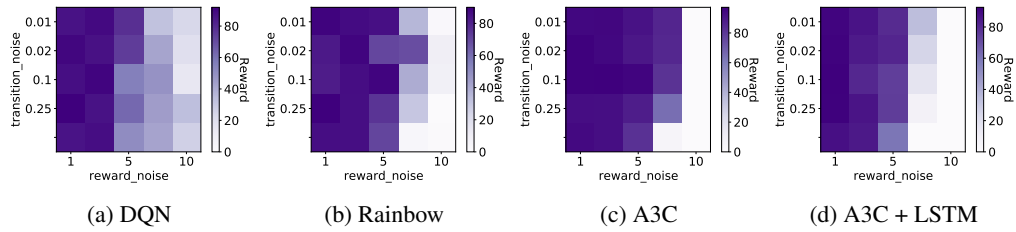

Figure 18: Mean episodic reward for evaluation rollouts (max 100 timesteps) at the end of training for the different algorithms **when varying transition and reward noise**.

1068

### 1069 J.3 Results for varying reward sparsity

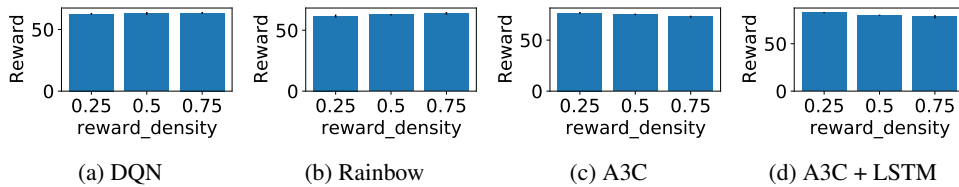

Figure 19: Mean episodic reward at the end of training for the algorithms **when varying reward sparsity**. Error bars represent 1 standard deviation. Note the different reward scales.

Figure 19 shows the results of controlling the meta-feature *sparsity* in the environment. The DQN variants were able to learn the important rewarding states in the environment even when these were sparse while the behaviour of A3C was unexpected. One explanation could be that A3C's exploration was not very good, in which case increasing reward density would help as in Figure 19c. But adding in an LSTM to the A3C agent seems to show the opposite trend (Figure 19d) as increasing reward density leads to worsening performance. This could indicate that having a greater density of rewarding states makes it harder for the LSTM to remember one state to stick to. This behaviour of A3C warrants more investigation in the future.

We have observed A3C is more variant in general than its DQN counterparts and this should be expected as it launches and collects data from several instances of the same environment which induces more variance.



1081 The *make\_denser* configuration option, makes learning smoother and less variant across different  
1082 runs of an algorithm, as can be seen in Figure 20a for DQN when compared to Figure 22 for corre-  
1083 sponding sequence lengths. To evaluate the *true* learning of algorithms, we turn off the *make\_denser*  
1084 option in the evaluation rollouts. The learning curves for these can be seen for DQN in Figure 20b.  
1085 The agent still does not perform as well as might be expected when making the reward signal denser  
1086 during training. This is probably due to the sequence lengths still *violating* the complete observability  
1087 assumption made by the algorithm. The plots for learning curves for the remaining algorithms are  
1088 present in Figures 70-75. The plots for final mean reward during training and evaluation are given in  
1089 Figures 19 and 26.

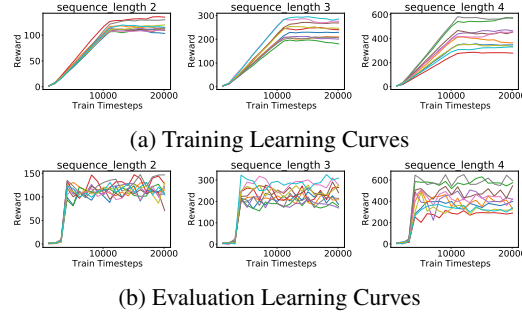

Figure 20: Learning curves for DQN when *make\_denser* is *True* for rewardable sequences. Please note the different Y-axis scales and the fact that with longer rewardable sequences, a greater number of seeds do not learn anything for the evaluation rollouts (reward  $\approx 0$ ).

#### 1090 J.4 Further results for varying reward delays and sequences

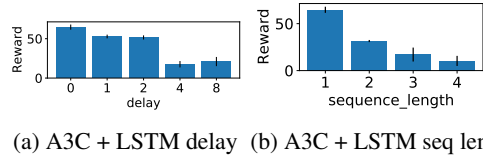

Figure 21: Mean episodic reward at the end of training for different agents for varying **delays** (top) and **sequence lengths** (bottom). Error bars represent 1 standard deviation. Note the reward scales.

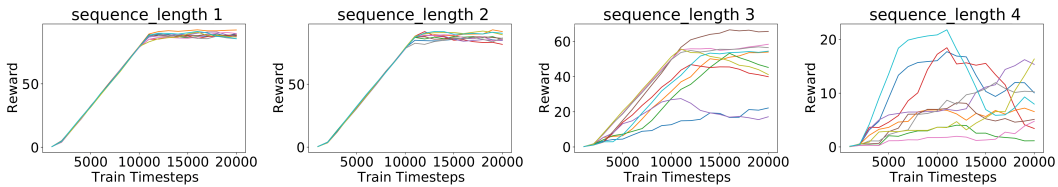

Figure 22: Train Learning Curves for 10 runs with different seeds for DQN when **varying sequence lengths**. Please note that each different colour corresponds to one of 10 seeds in each subplot.

1091 Note that we varied delay on a logarithmic scale and sequence length on a linear one which means  
1092 that this effect is more pronounced than may first appear when looking at the figures. We additionally  
1093 also plot the *learning curves*, when varying sequence lengths, in Figure 22. We see how training  
1094 proceeds much more smoothly and is less variant across different seeds for the vanilla environment  
1095 (where the sequence length is 1) and that the variance across seeds is very large for sequence length 3.

#### 1096 J.5 Selecting Total Timesteps for Runs

1097 We ran the experiments and plot the results for DQN variants up to 20 000 environment timesteps  
1098 and the ones for A3C variants up to 150 000 time steps since A3C took longer<sup>2</sup> to learn as can be

<sup>2</sup>In terms of environment steps. Wallclock time used was still similar.

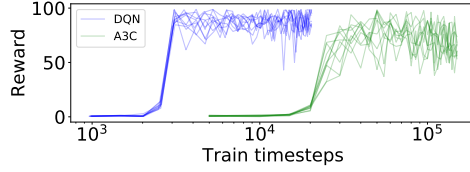

Figure 23: Evaluation rollouts (limited to 100 timesteps per episode) for DQN and A3C in the vanilla environment which shows that DQN learns faster than A3C in terms of the number of timesteps.

seen in Figure 23. We refrain from fixing a single number of timesteps for our environments (as, e.g., bsuite does), since the study of different trends for different families of algorithms will require different numbers of timesteps. Policy gradient methods such as A3C are slower in general compared to value-based approaches such as DQN. Throughout, we always run 10 seeds of all algorithms to obtain reliable results. We repeated many of our experiments with an independent set of 10 seeds and obtained the same qualitative results.

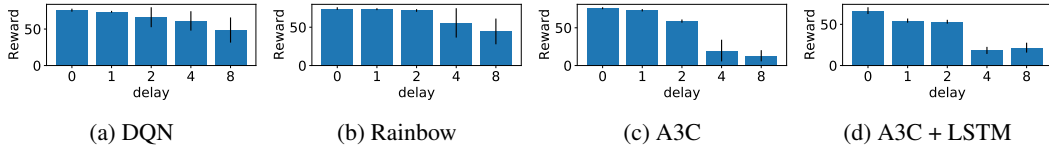

Figure 24: Mean episodic reward for evaluation rollouts (limited to 100 timesteps) at the end of training for the different algorithms **when varying delay**. Error bars represent 1 standard deviation.

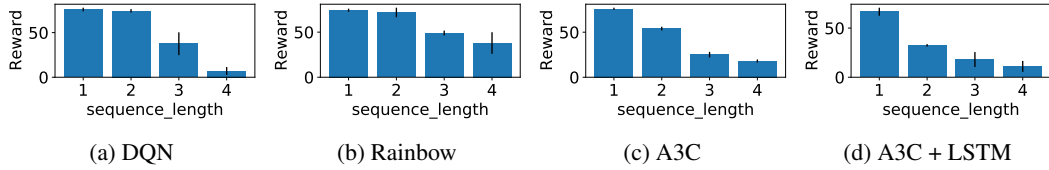

Figure 25: Mean episodic reward for evaluation rollouts (limited to 100 timesteps) at the end of training for the different algorithms **when varying sequence lengths**. Error bars represent 1 standard deviation.

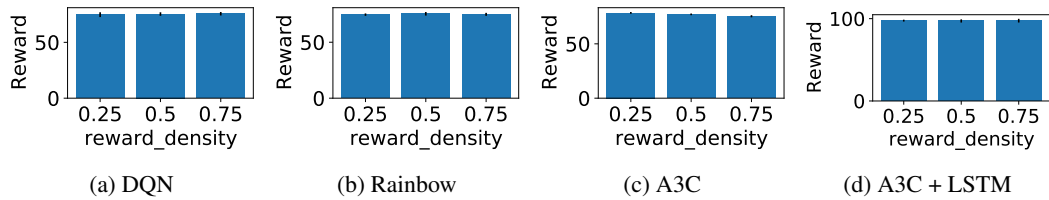

Figure 26: Mean episodic reward for evaluation rollouts (limited to 100 timesteps) at the end of training for the different algorithms **when varying reward sparsity**. Error bars represent 1 standard deviation.

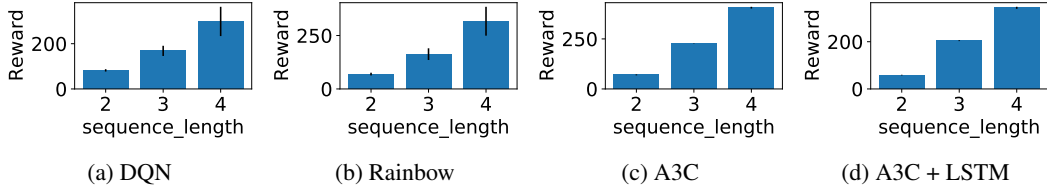

Figure 27: Mean episodic reward at the end of training for the different algorithms **when *make\_denser* is *True* for rewardable sequences**. Error bars represent 1 standard deviation.

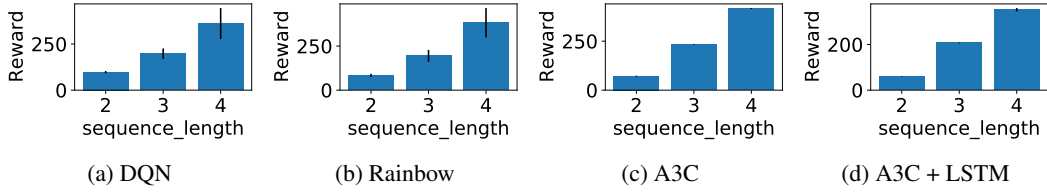

Figure 28: Mean episodic reward for evaluation rollouts (limited to 100 timesteps) at the end of training for the different algorithms **when *make\_denser* is *True* for rewardable sequences**. Error bars represent 1 standard deviation.

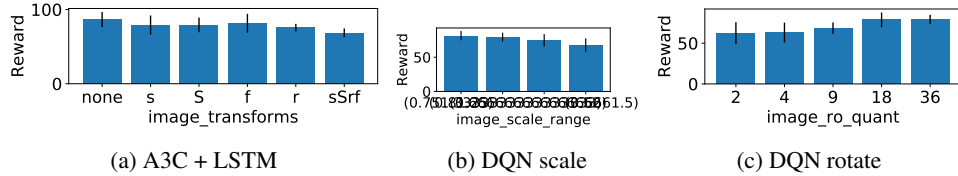

Figure 29: Mean episodic reward at the end of training for the different algorithms **when varying representation learning**. 's' represents *shift*, 'S' represents *scale*, 'f' represents *flip* and 'r' represents *rotate* in the labels in the first subfigure. *scale\_range* represents *scaling* ranges in the second subfigure. *image\_ro\_quant* is represents quantisation of the *rotations* in the third subfigure. Error bars represent 1 standard deviation.

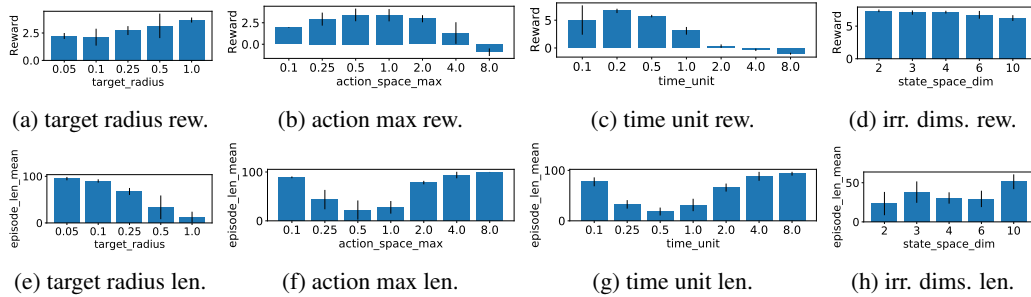

Figure 30: Mean episodic reward (above) and lengths (below) for TD3 at the end of training. Error bars represent 1 standard deviation.

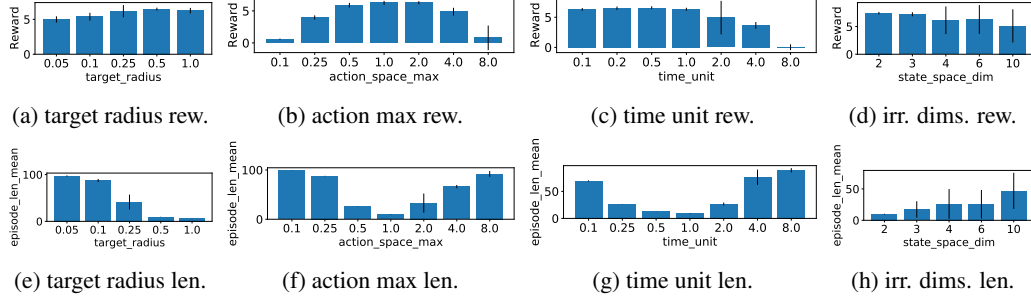

Figure 31: Mean episodic reward (above) and lengths (below) for SAC at the end of training. Error bars represent 1 standard deviation.

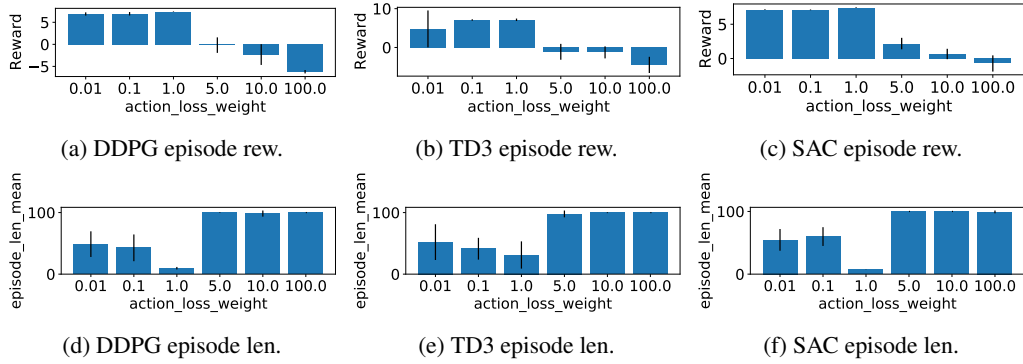

Figure 32: Mean episodic reward (above) and lengths (below) at the end of training for evaluation rollouts for DDPG, TD3 and SAC when varying **action\_loss\_weight**. Error bars represent 1 standard deviation.

## K Plots for tabular baselines

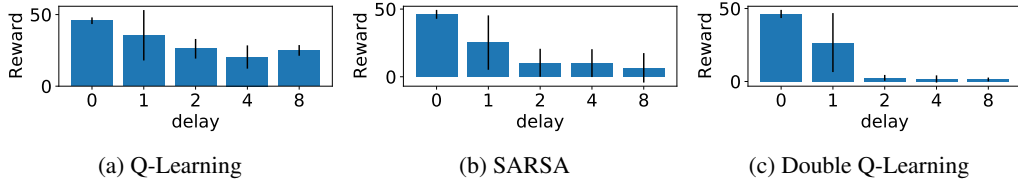

Figure 33: Mean episodic reward (limited to 100 timesteps) at the end of training for three different tabular baseline algorithms **when varying reward delay**. Error bars represent 1 standard deviation.

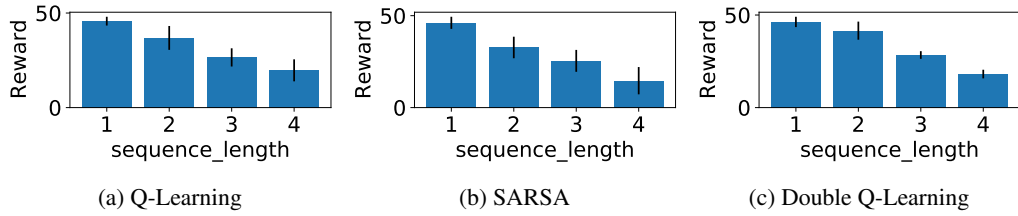

Figure 34: Mean episodic reward (limited to 100 timesteps) at the end of training for three different tabular baseline algorithms **when varying sequence length**. Error bars represent 1 standard deviation.

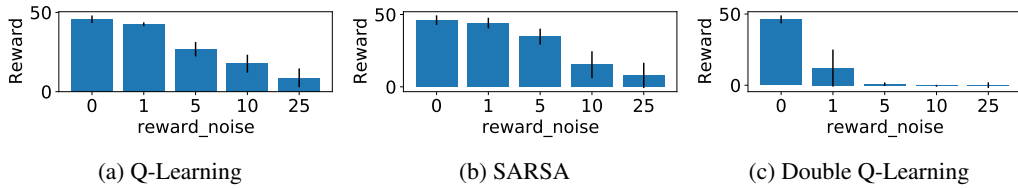

Figure 35: Mean episodic reward (limited to 100 timesteps) at the end of training for three different tabular baseline algorithms **when varying reward noise**. Error bars represent 1 standard deviation.

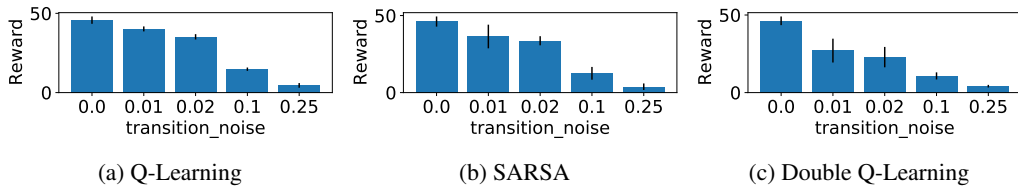

Figure 36: Mean episodic reward (limited to 100 timesteps) at the end of training for three different tabular baseline algorithms **when varying transition noise**. Error bars represent 1 standard deviation.

## L Plots for varying 2 hardness dimensions together

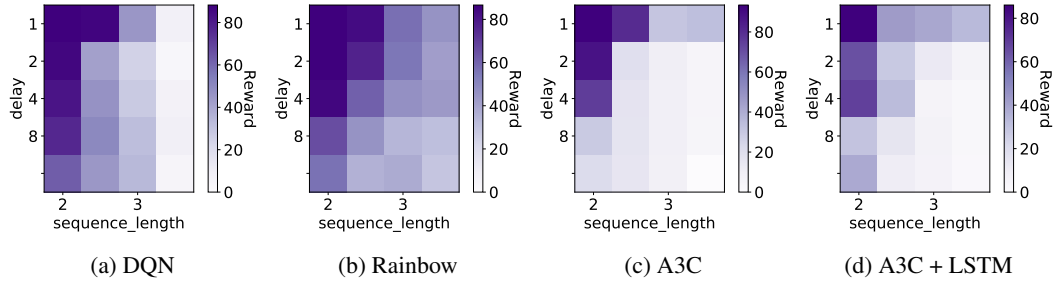

Figure 37: Mean episodic reward at the end of training for the different algorithms **when varying delay and sequence lengths**. Please note the different colorbar scales.

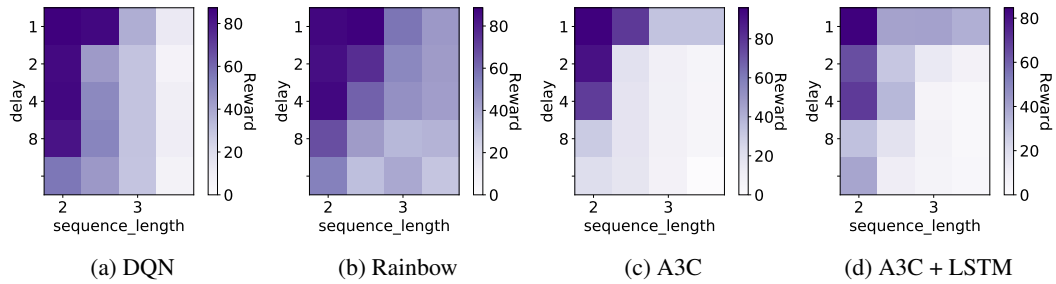

Figure 38: Mean episodic reward for evaluation rollouts (limited to 100 timesteps) at the end of training for the different algorithms **when varying delay and rewardable sequence lengths**. Please note the different colorbar scales.

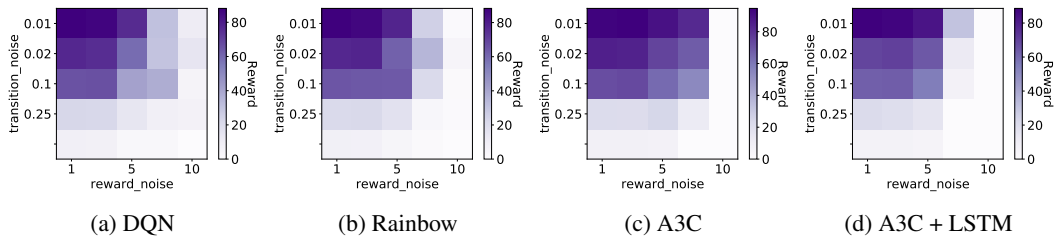

Figure 39: Mean episodic reward at the end of training for the different algorithms **when varying transition noise and reward noise**. Please note the different colorbar scales.

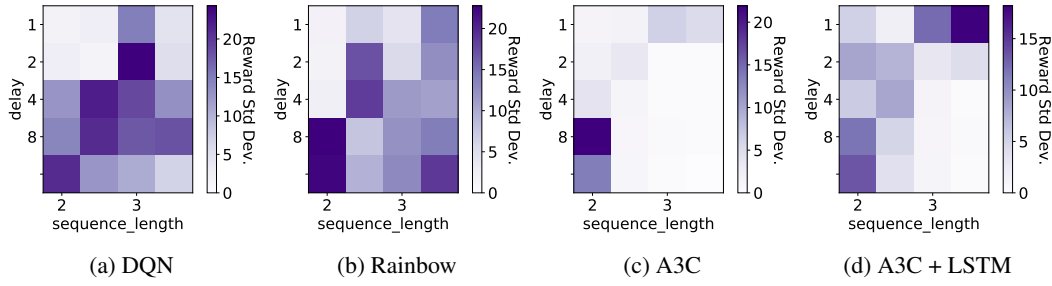

Figure 40: Standard deviation of mean episodic reward at the end of training for the different algorithms **when varying delay and sequence lengths**. Please note the different colorbar scales.

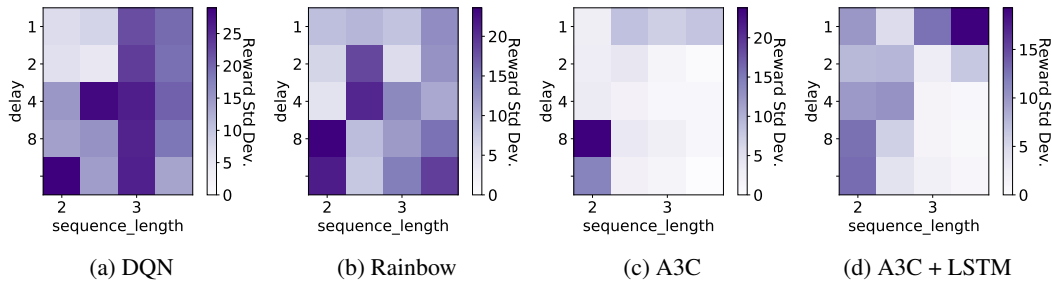

Figure 41: Standard deviation of mean episodic reward for evaluation rollouts (limited to 100 timesteps) at the end of training for the different algorithms **when varying delay and rewardable sequence lengths**. Please note the different colorbar scales.

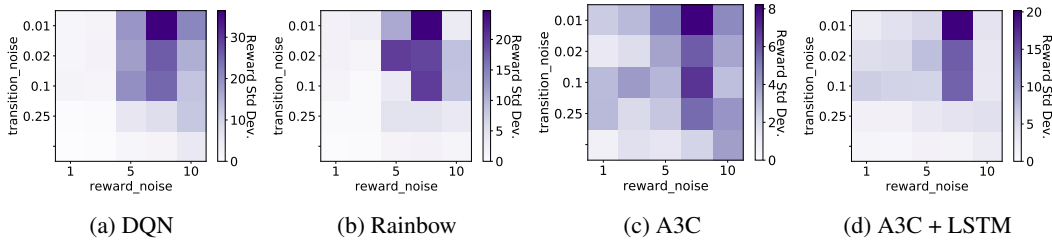

Figure 42: Standard deviation of mean episodic reward at the end of training for the different algorithms **when varying transition noise and reward noise**. Please note the different colorbar scales.

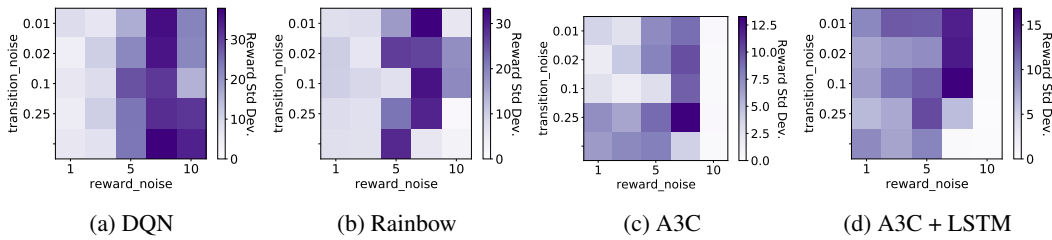

Figure 43: Standard deviation of mean episodic reward at the end of training for evaluation rollouts (limited to 100 timesteps) at the end of training for the different algorithms **when varying transition noise and reward noise**. Please note the different colorbar scales.

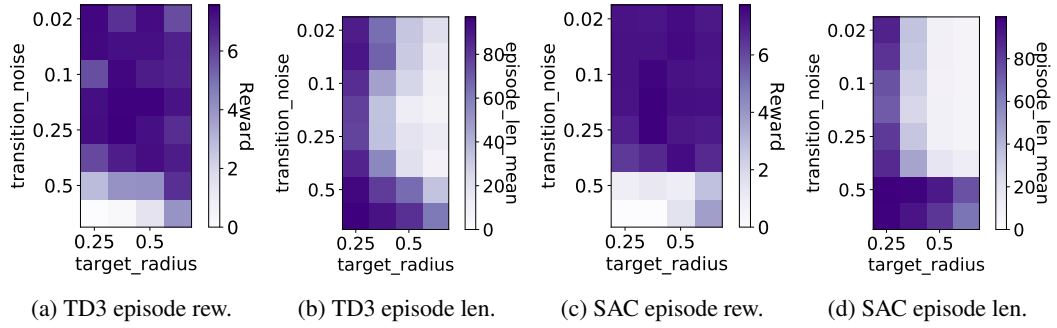

Figure 44: Mean episodic reward and lengths at the end of training for the different algorithms **when varying  $P$  noise and target radius.**

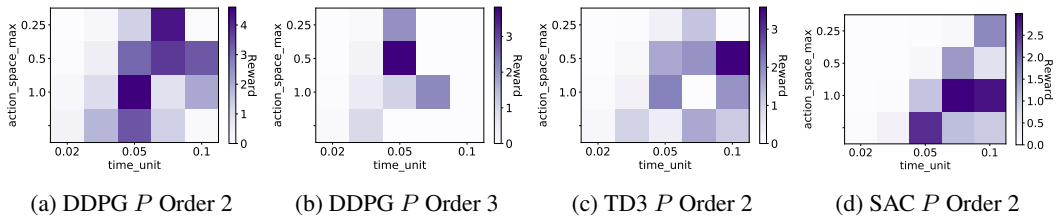

Figure 45: Mean episodic reward at the end of training for the different algorithms **when varying action space max and time unit for a given  $P$  order.**



## M Additional Learning Curves

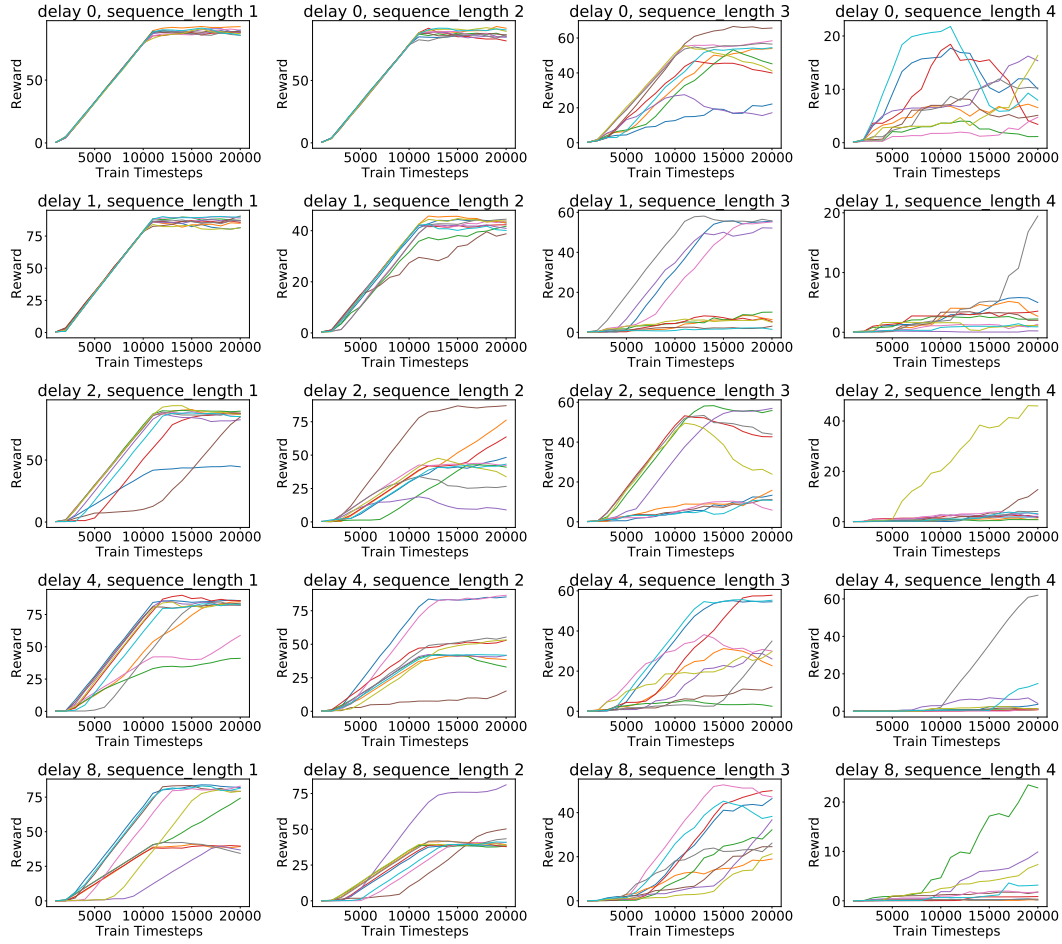

Figure 46: Training Learning Curves for DQN when varying delay and sequence lengths. Please note the different colorbar scales.

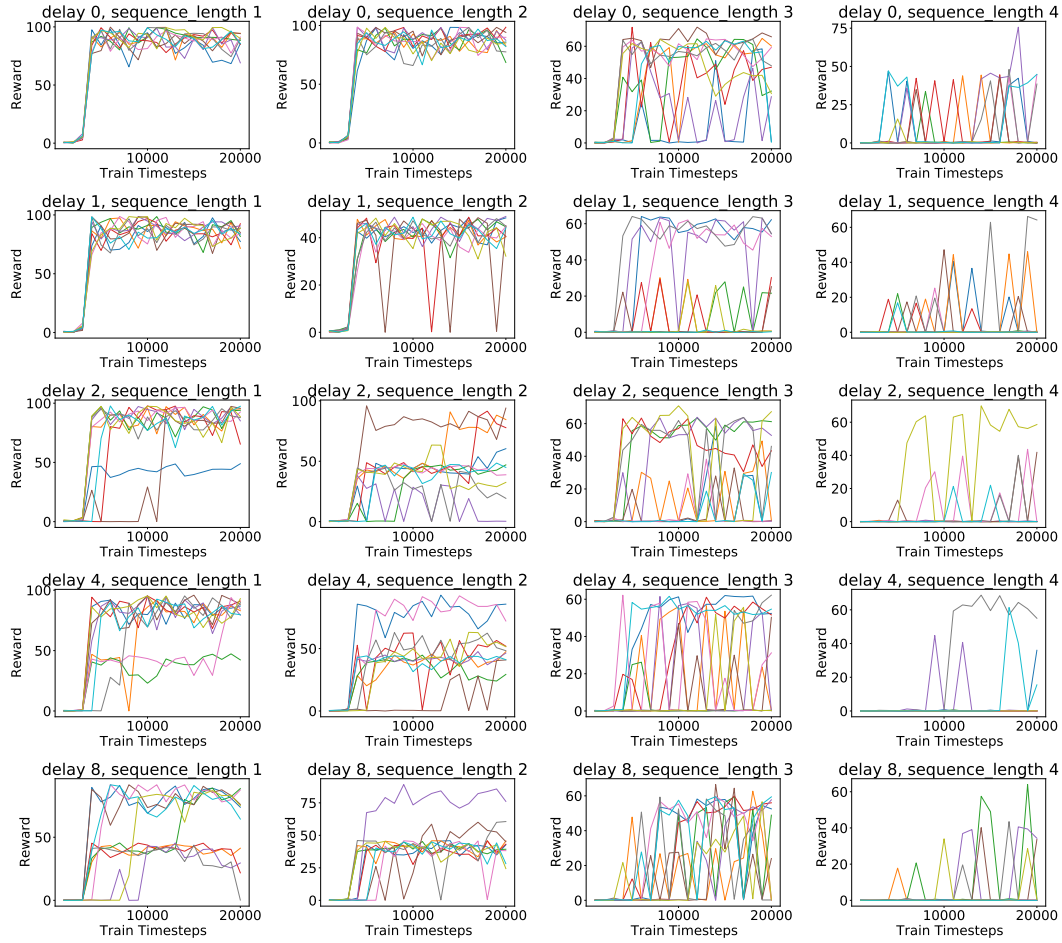

Figure 47: Evaluation Learning Curves for DQN when varying delay and sequence lengths. Please note the different colorbar scales.

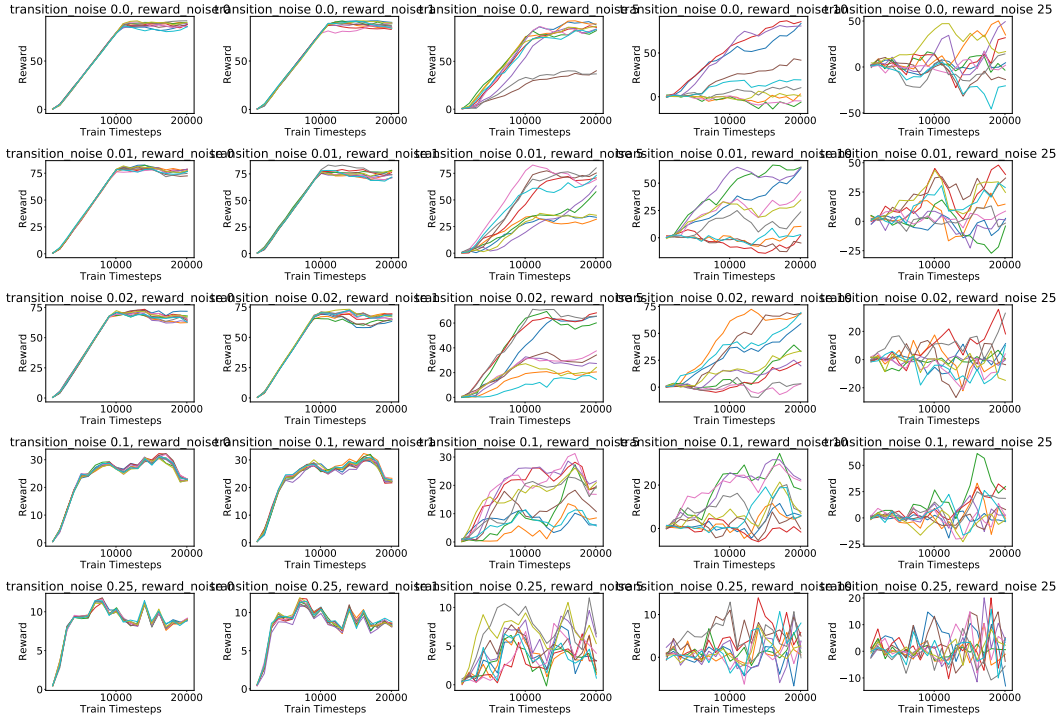

Figure 48: Training Learning Curves for DQN when varying transition noise and reward noise.

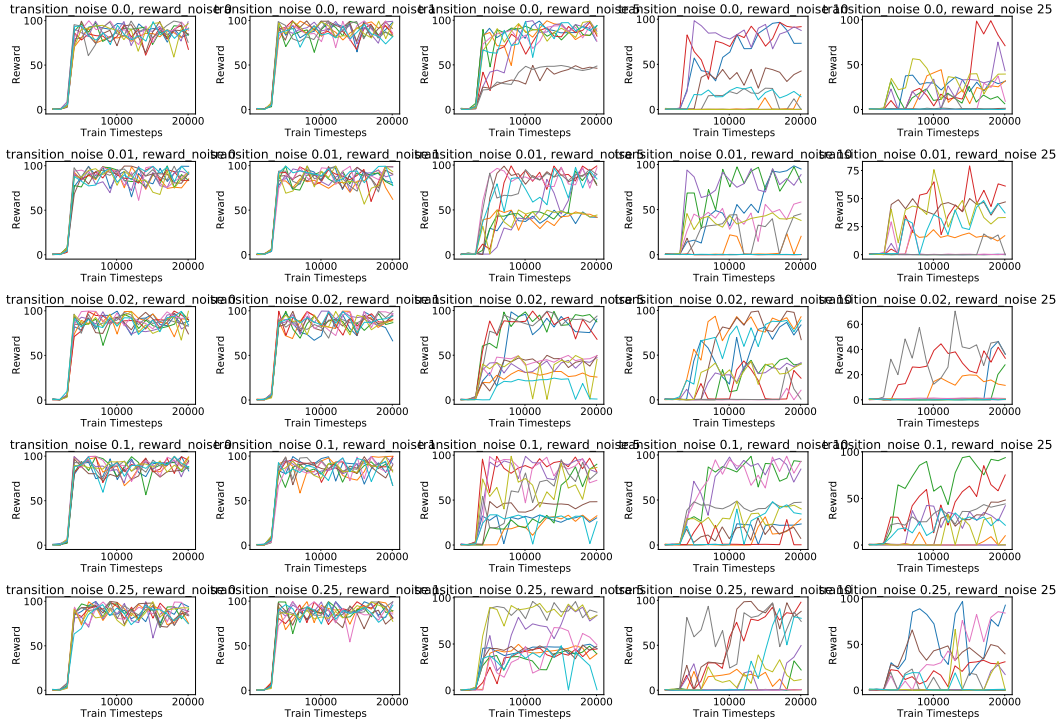

Figure 49: Evaluation Learning Curves for DQN when varying transition noise and reward noise. Please note the different Y-axis scales.

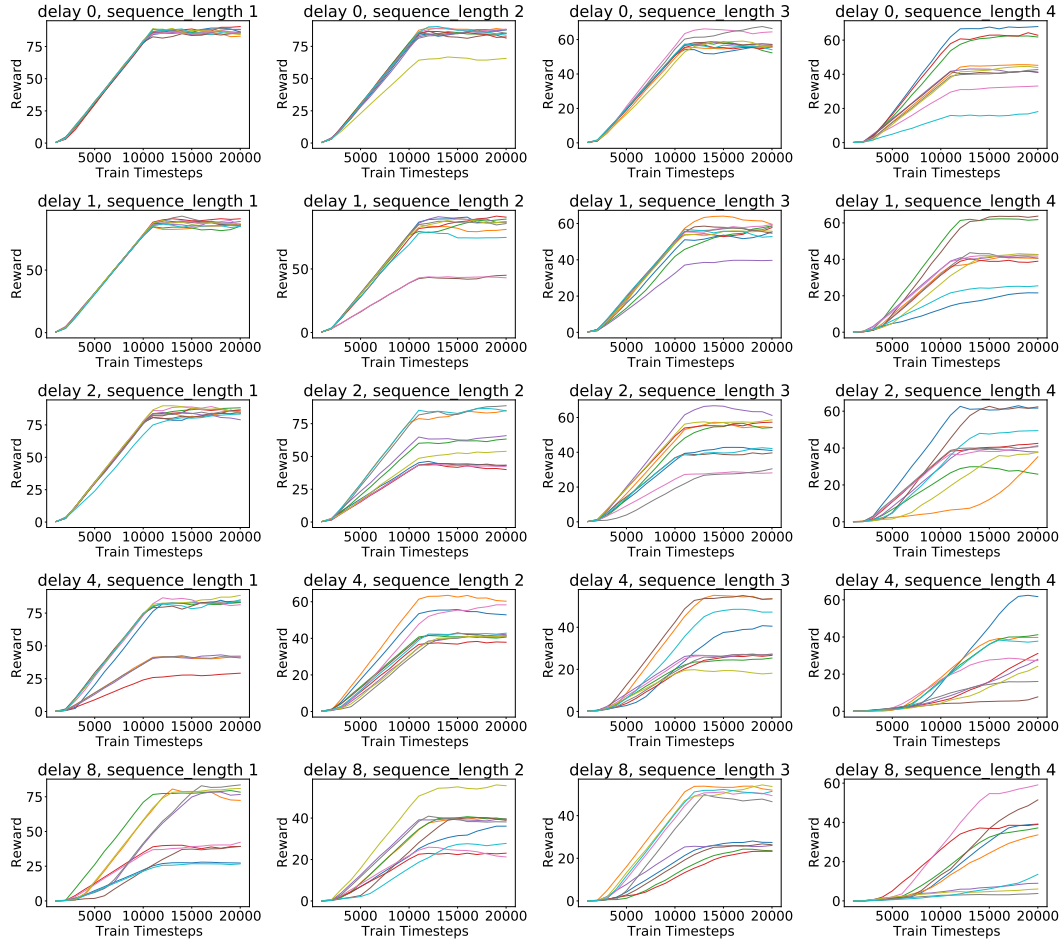

Figure 50: Training Learning Curves for Rainbow **when varying delay and sequence lengths**. Please note the different Y-axis scales.

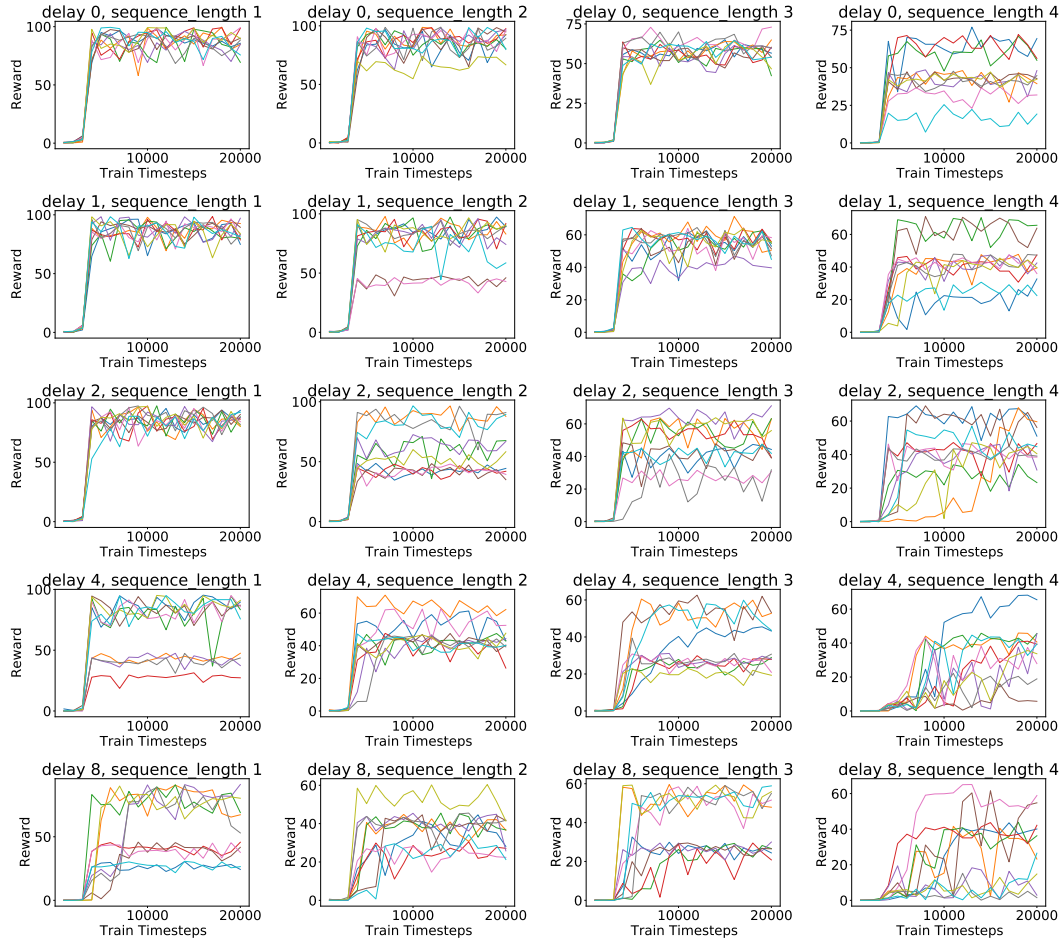

Figure 51: Evaluation Learning Curves for Rainbow **when varying delay and sequence lengths**. Please note the different Y-axis scales.

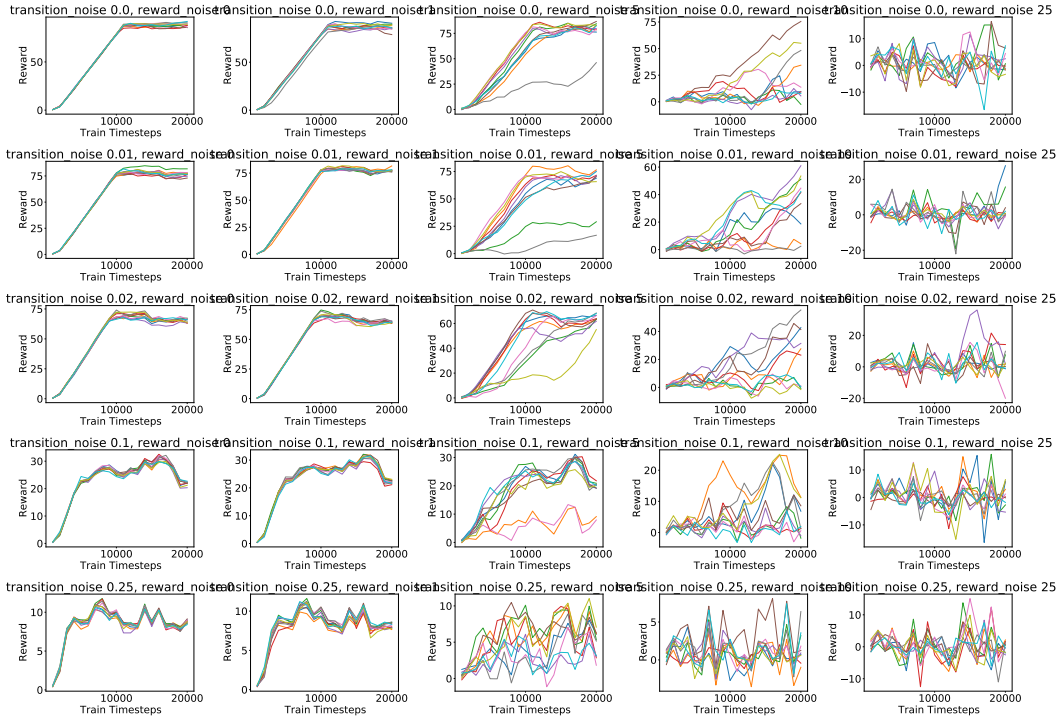

Figure 52: Training Learning Curves for Rainbow **when varying noises**. Please note the different Y-axis scales.

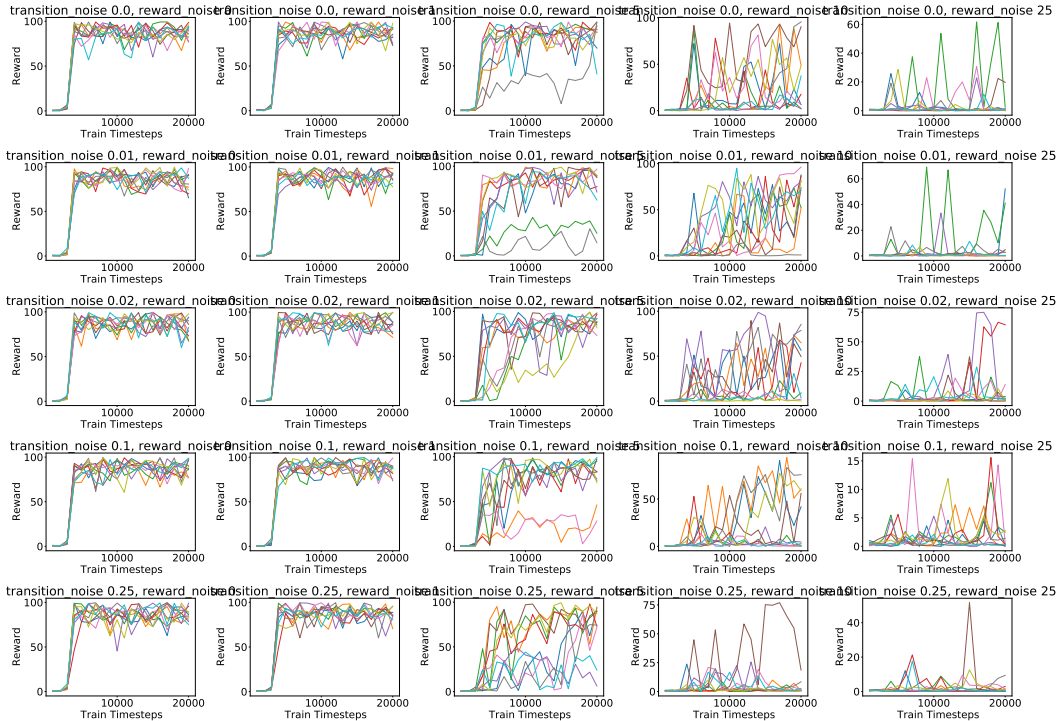

Figure 53: Evaluation Learning Curves for Rainbow **when varying noises**. Please note the different Y-axis scales.



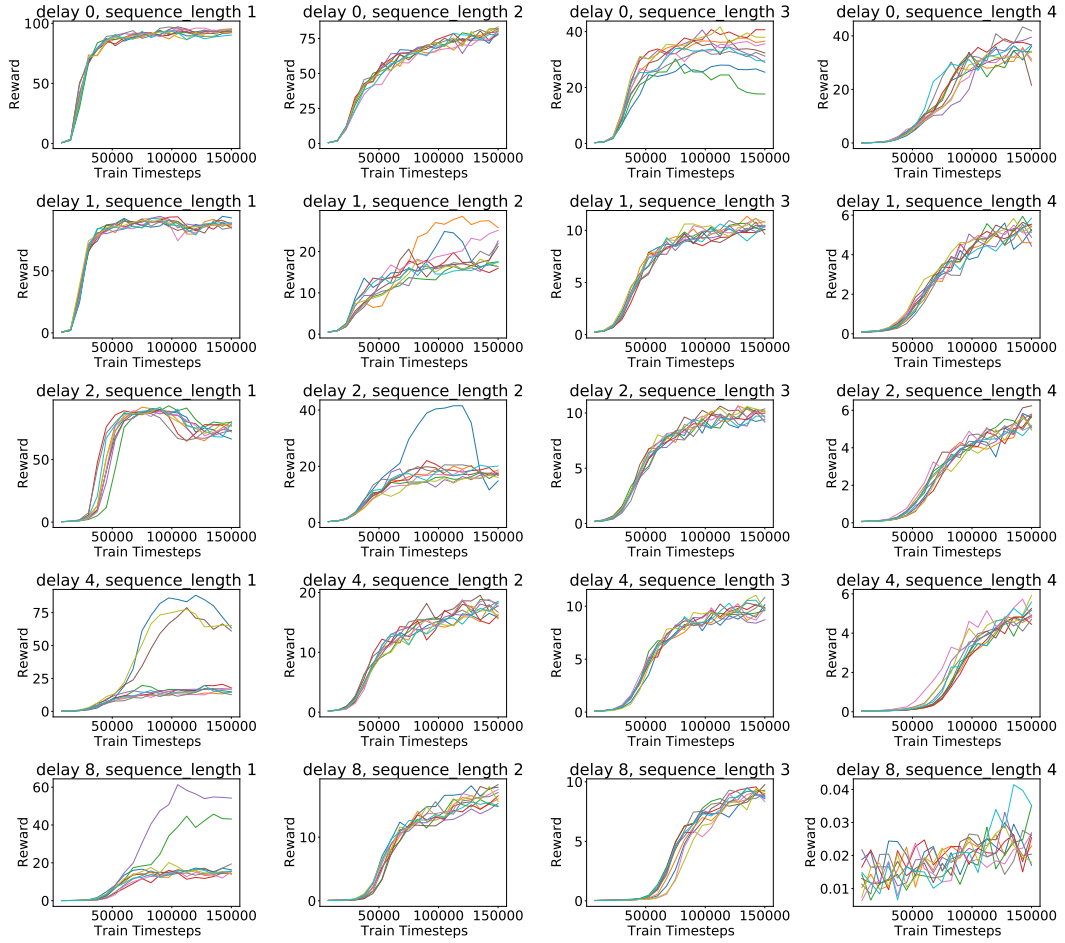

Figure 54: Training Learning Curves for A3C when varying delay and sequence lengths. Please note the different Y-axis scales.

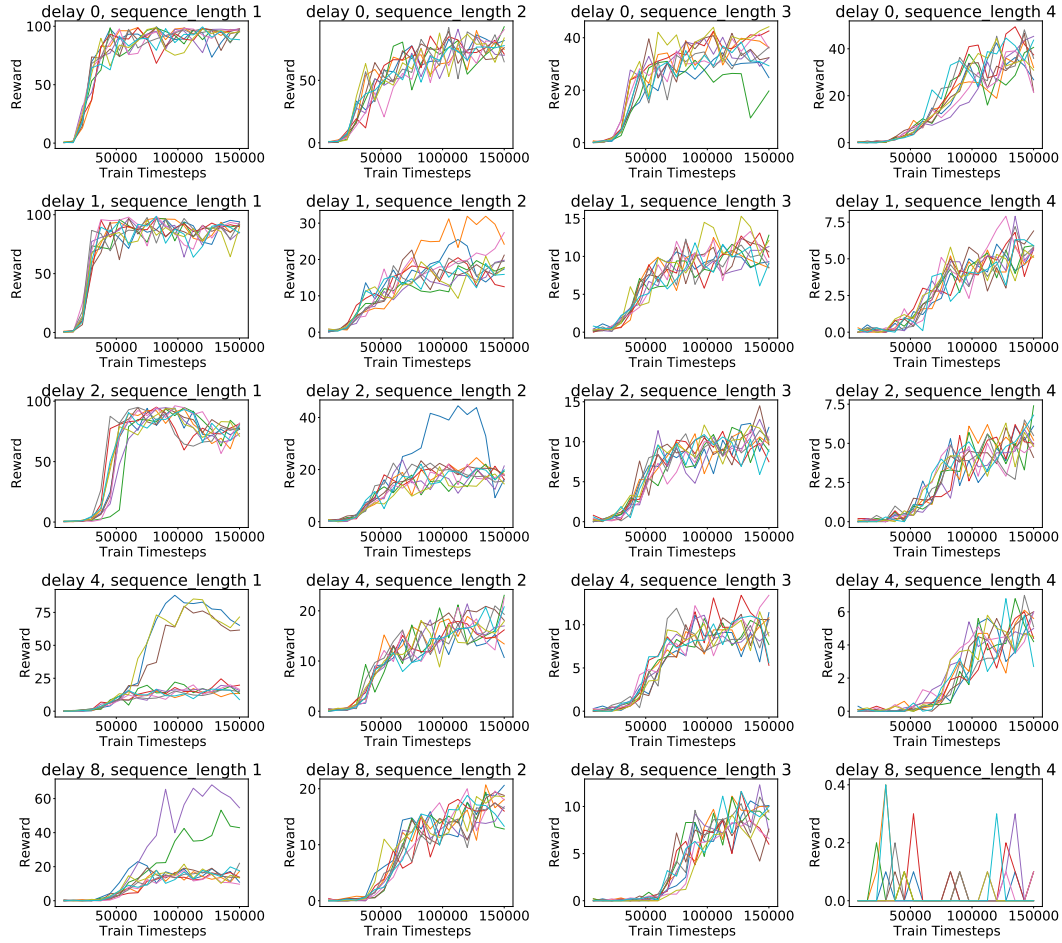

Figure 55: Evaluation Learning Curves for A3C **when varying delay and sequence lengths**. Please note the different Y-axis scales.



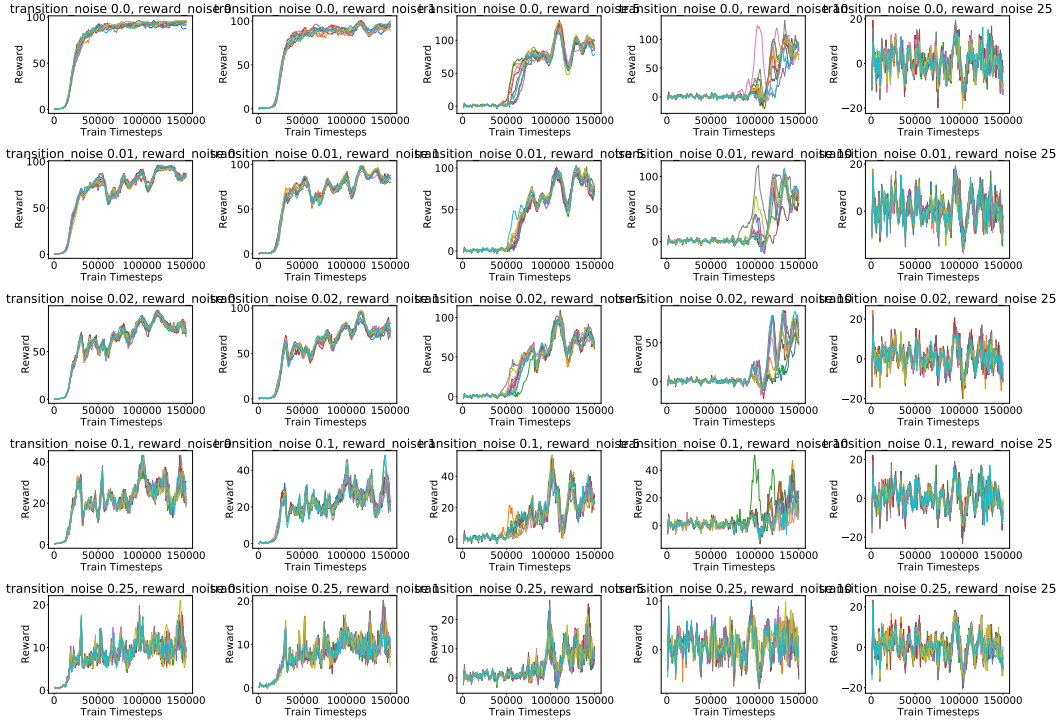

Figure 56: Training Learning Curves for A3C when varying noises. Please note the different Y-axis scales.

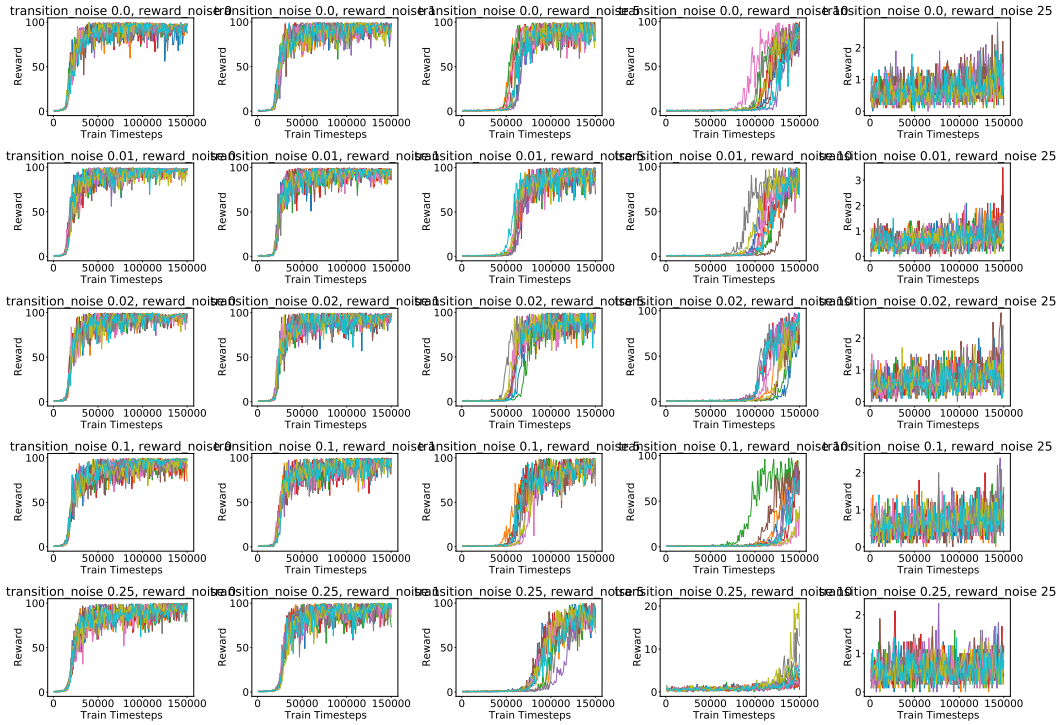

Figure 57: Evaluation Learning Curves for A3C when varying noises. Please note the different Y-axis scales.

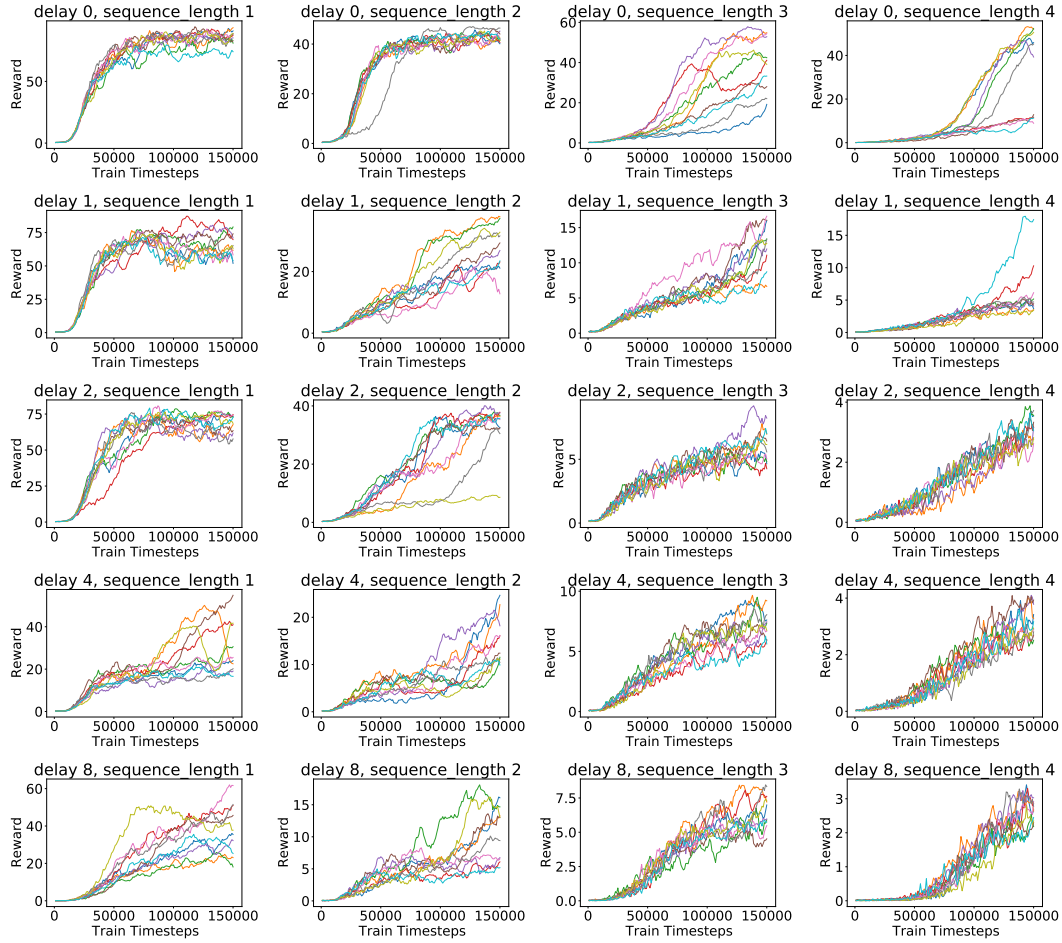

Figure 58: Training Learning Curves for A3C with LSTM when varying delay and sequence lengths. Please note the different Y-axis scales.

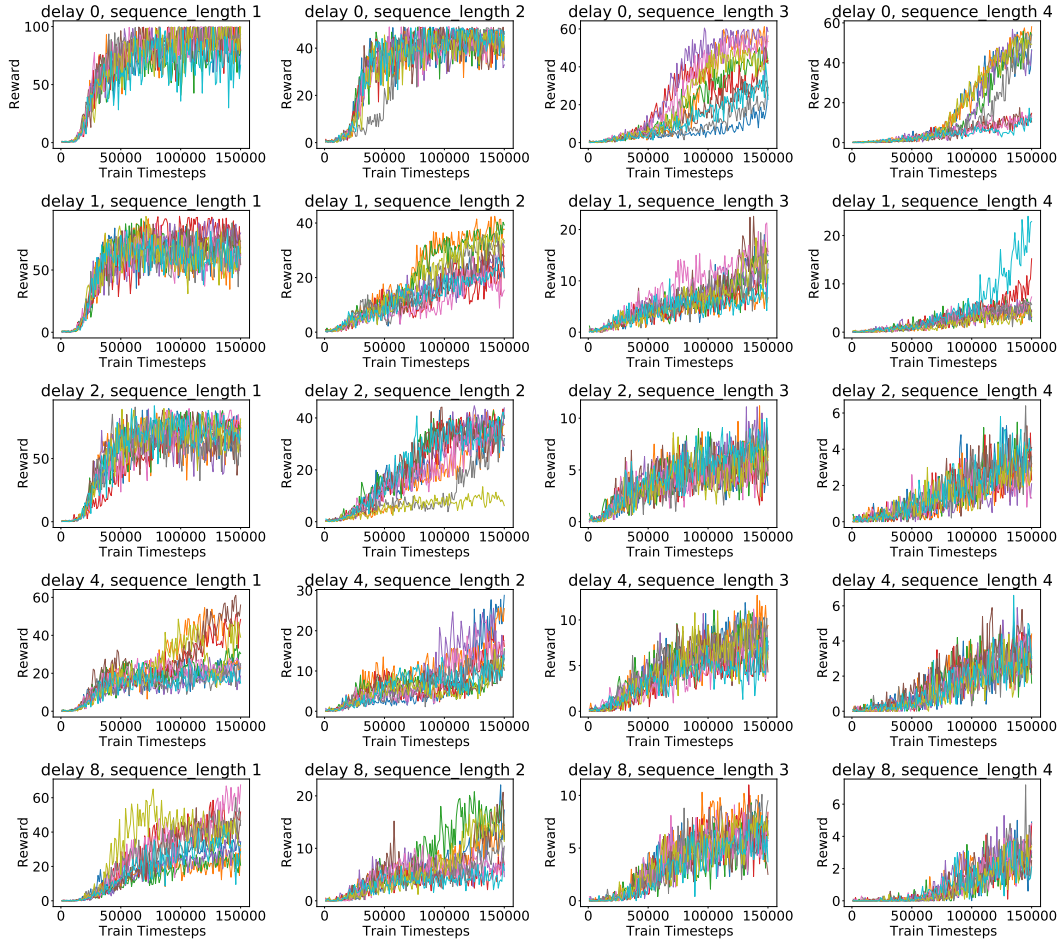

Figure 59: Evaluation Learning Curves for A3C with LSTM when varying delay and sequence lengths. Please note the different Y-axis scales.

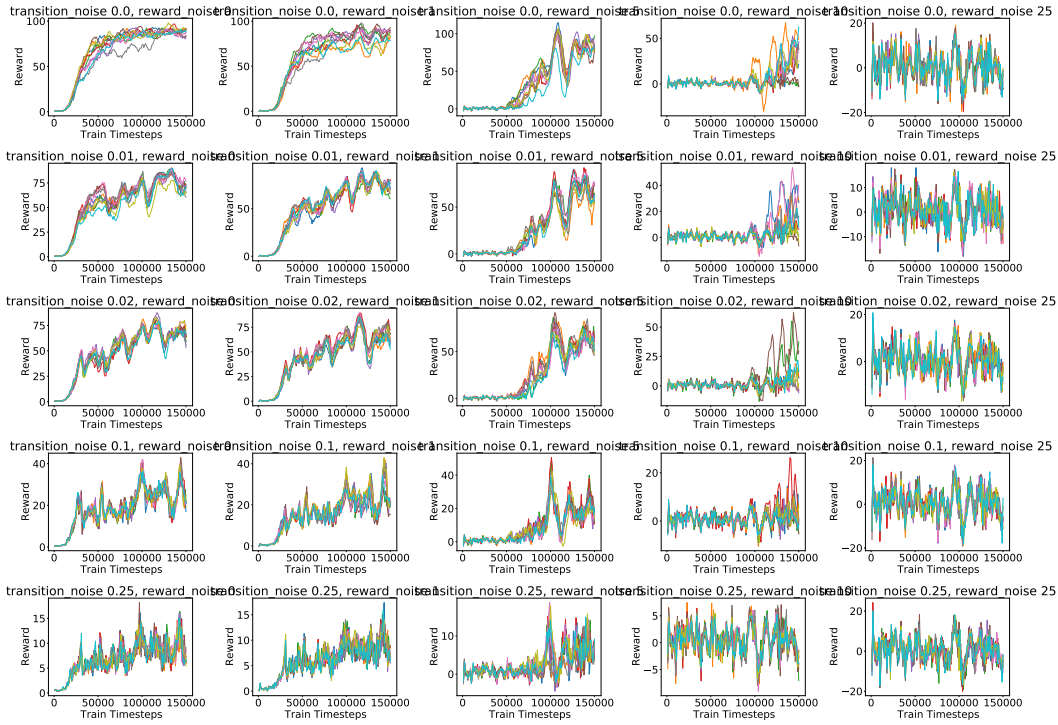

Figure 60: Training Learning Curves for A3C with LSTM when varying noises. Please note the different Y-axis scales.

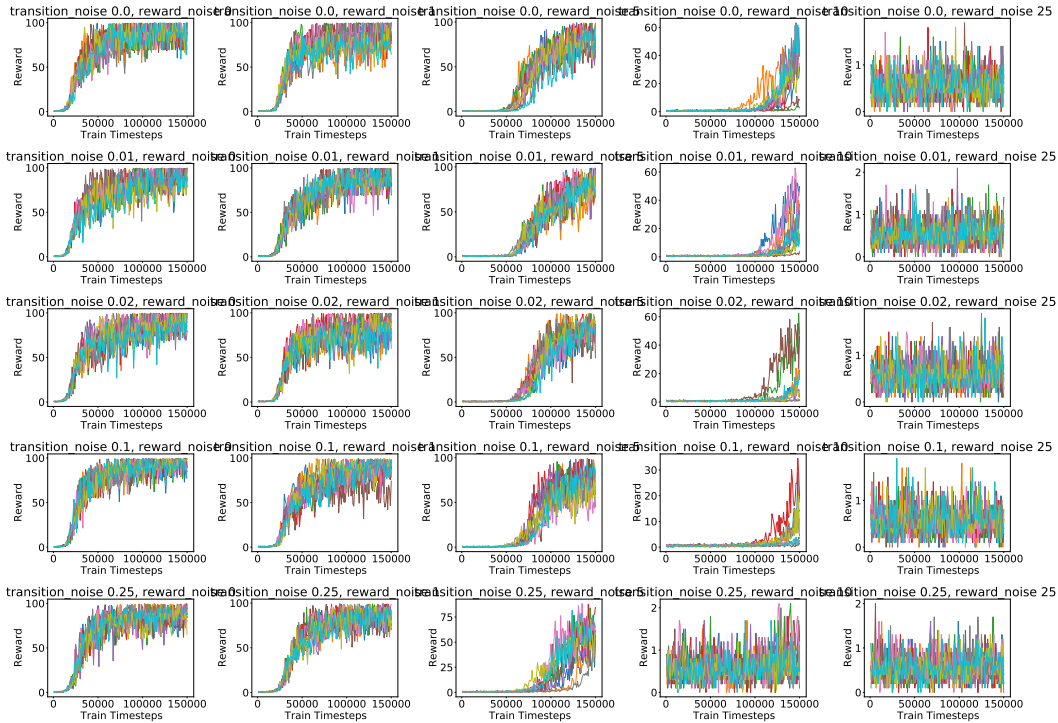

Figure 61: Evaluation Learning Curves for A3C with LSTM when varying noises. Please note the different Y-axis scales.

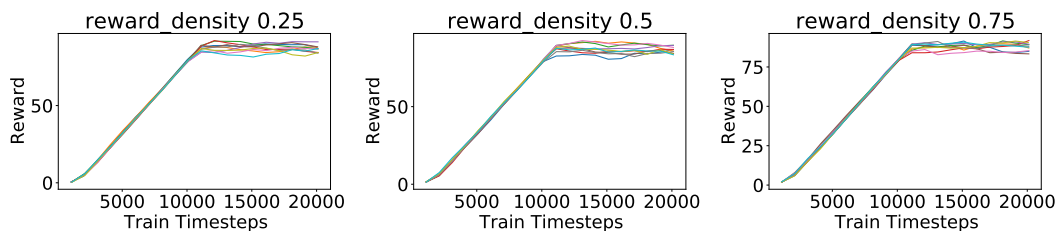

Figure 62: Training Learning Curves for DQN **when varying reward sparsity**. Please note the different Y-axis scales.

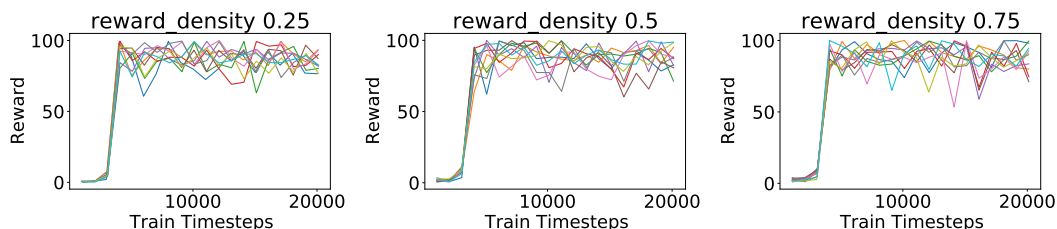

Figure 63: Evaluation Learning Curves for DQN **when varying reward sparsity**. Please note the different Y-axis scales.

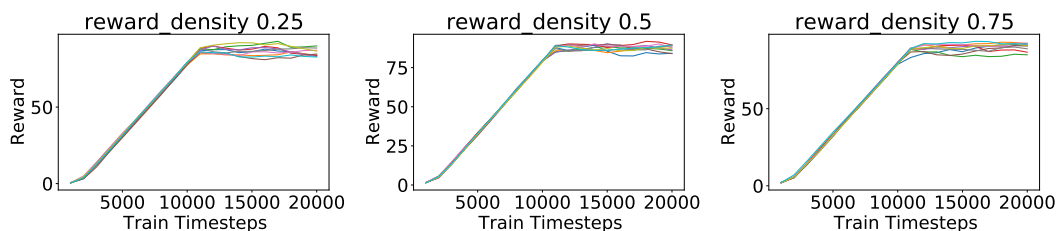

Figure 64: Training Learning Curves for Rainbow **when varying reward sparsity**. Please note the different Y-axis scales.

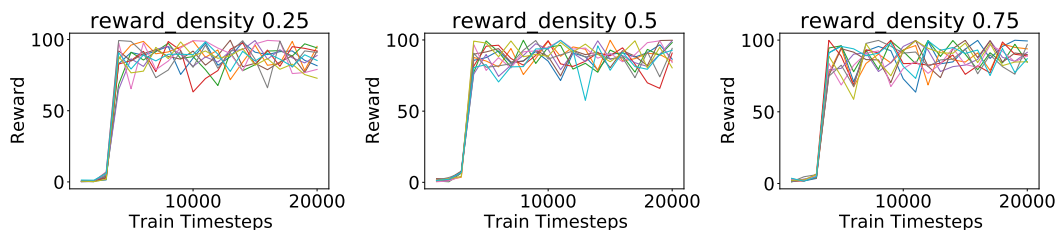

Figure 65: Evaluation Learning Curves for Rainbow **when varying reward sparsity**. Please note the different Y-axis scales.

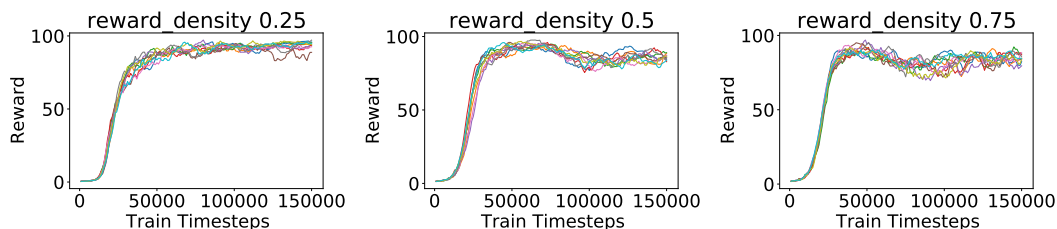

Figure 66: Training Learning Curves for A3C **when varying reward sparsity**. Please note the different Y-axis scales.

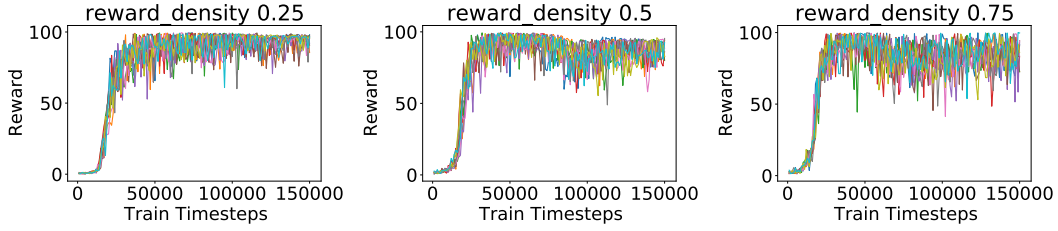

Figure 67: Evaluation Learning Curves for A3C **when varying reward sparsity**. Please note the different Y-axis scales.

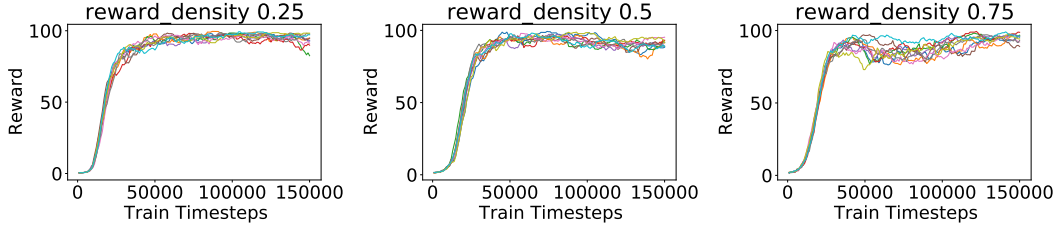

Figure 68: Training Learning Curves for A3C + LSTM **when varying reward sparsity**. Please note the different Y-axis scales.

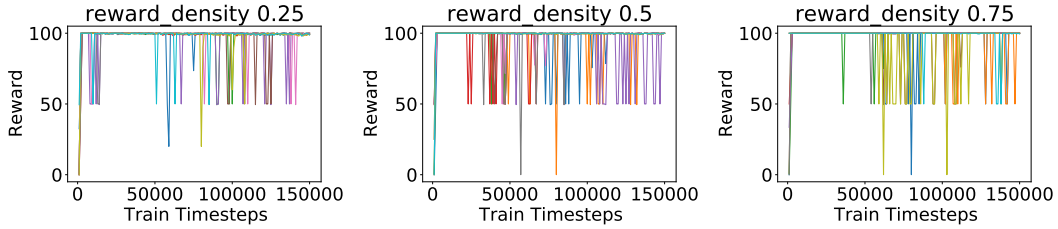

Figure 69: Evaluation Learning Curves for A3C + LSTM **when varying reward sparsity**. Please note the different Y-axis scales.

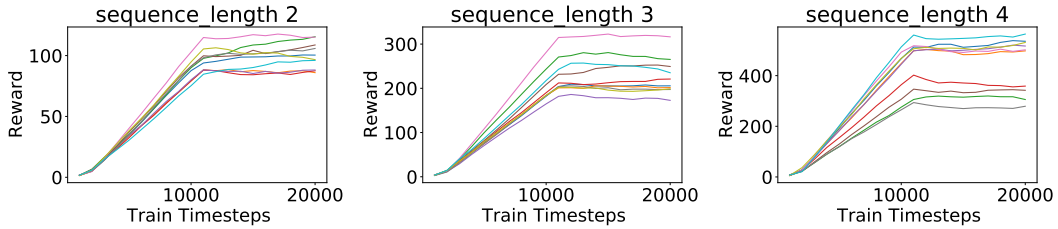

Figure 70: Training Learning Curves for Rainbow **when `make_denser` is `True` for rewardable sequences**. Please note the different Y-axis scales.

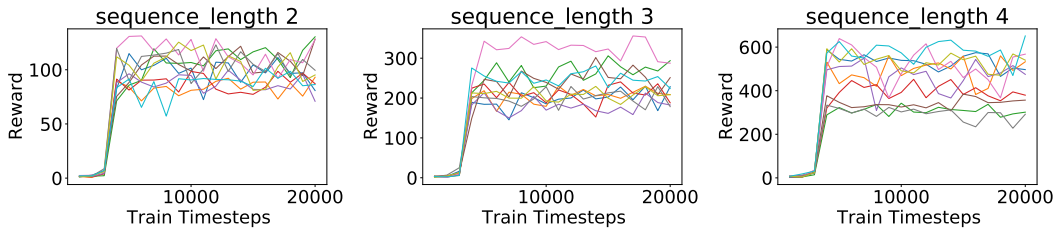

Figure 71: Evaluation Learning Curves for Rainbow **when `make_denser` is `True` for rewardable sequences**. Please note the different Y-axis scales.



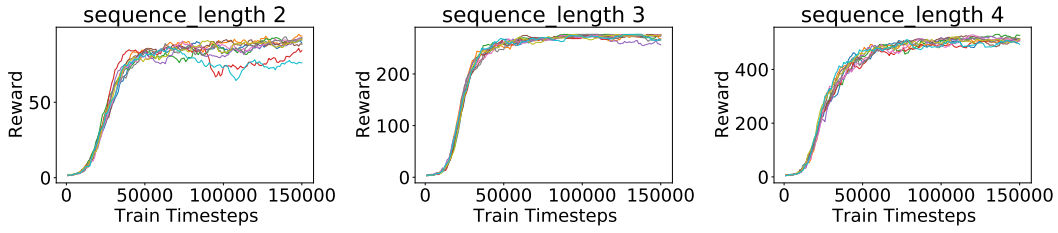

Figure 72: Training Learning Curves for A3C **when `make_denser` is `True` for rewardable sequences**. Please note the different Y-axis scales.

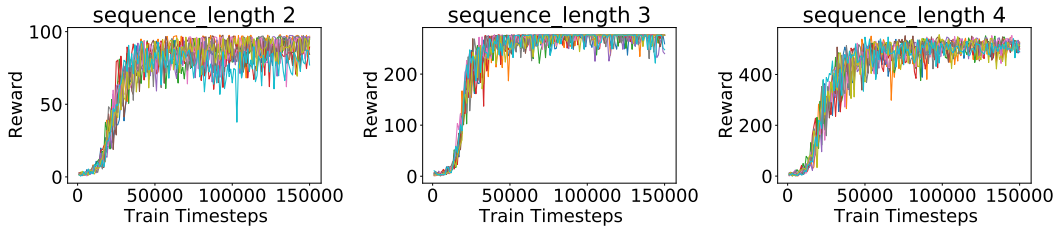

Figure 73: Evaluation Learning Curves for A3C **when `make_denser` is `True` for rewardable sequences**. Please note the different Y-axis scales.

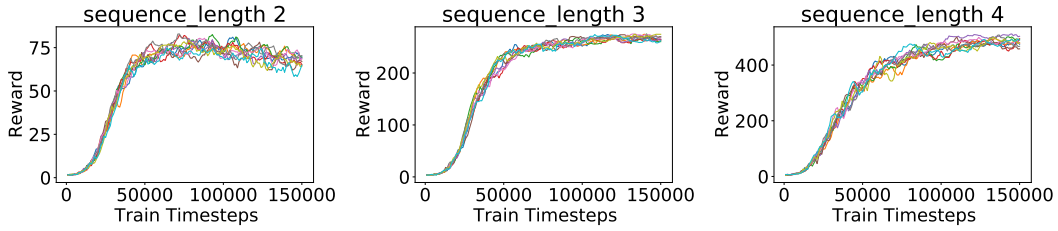

Figure 74: Training Learning Curves for A3C + LSTM **when `make_denser` is `True` for rewardable sequences**. Please note the different Y-axis scales.

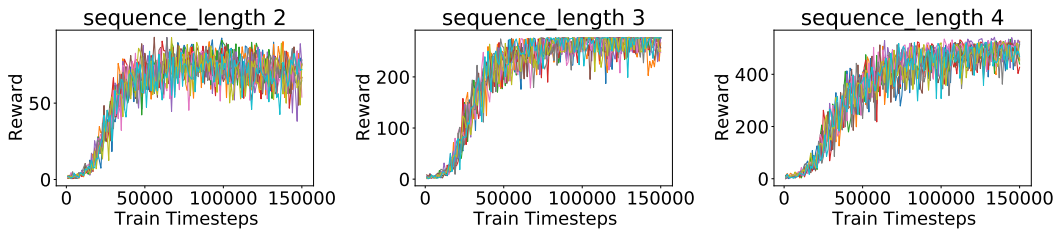

Figure 75: Evaluation Learning Curves for A3C + LSTM **when `make_denser` is `True` for rewardable sequences**. Please note the different Y-axis scales.

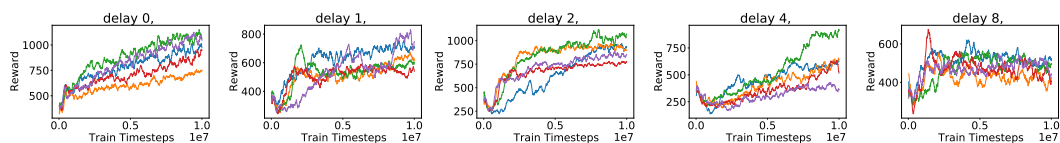

Figure 76: Training Learning Curves for DQN on beam\_rider **when varying delay**. Please note the different Y-axis scales.

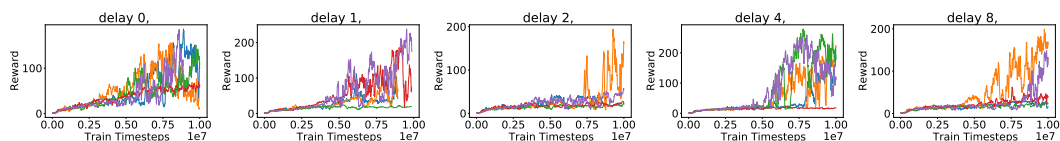

Figure 77: Training Learning Curves for DQN on breakout **when varying delay**. Please note the different Y-axis scales.

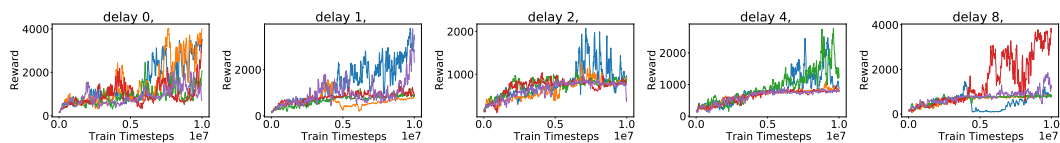

Figure 78: Training Learning Curves for DQN on qbort **when varying delay**. Please note the different Y-axis scales.



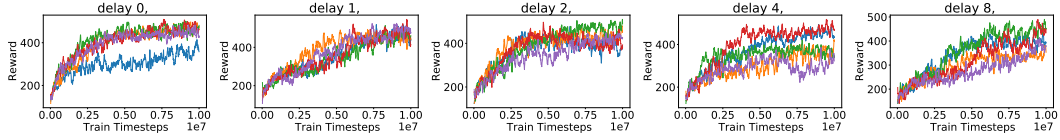

Figure 79: Training Learning Curves for DQN on space\_invaders **when varying delay**. Please note the different Y-axis scales.

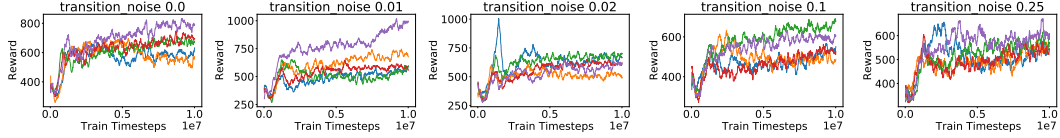

Figure 80: Training Learning Curves for DQN on beam\_rider **when varying transition noise**. Please note the different Y-axis scales.

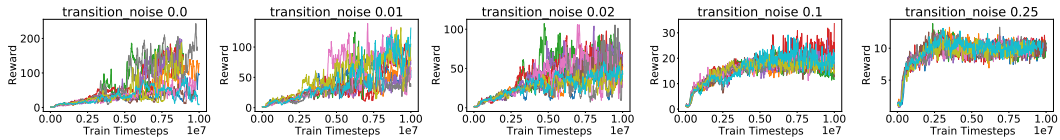

Figure 81: Training Learning Curves for DQN on breakout **when varying transition noise**. Please note the different Y-axis scales.

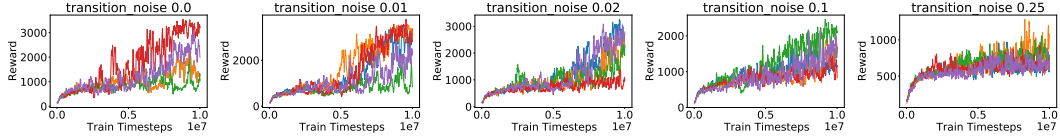

Figure 82: Training Learning Curves for DQN on qbert **when varying transition noise**. Please note the different Y-axis scales.

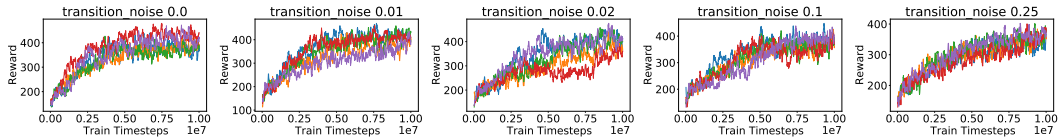

Figure 83: Training Learning Curves for DQN on space\_invaders **when varying transition noise**. Please note the different Y-axis scales.

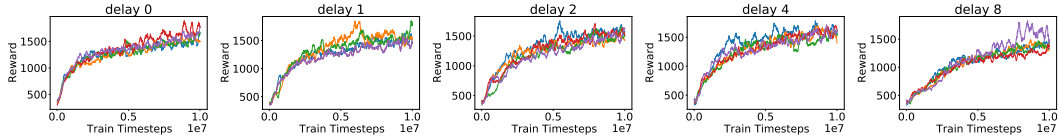

Figure 84: Training Learning Curves for Rainbow on beam\_rider **when varying delay**. Please note the different Y-axis scales.

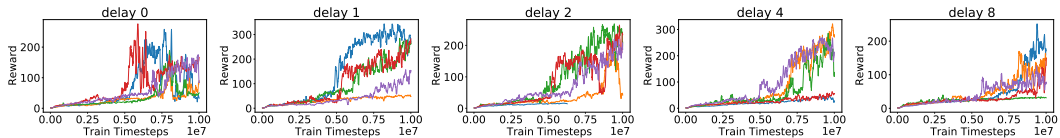

Figure 85: Training Learning Curves for Rainbow on breakout **when varying delay**. Please note the different Y-axis scales.

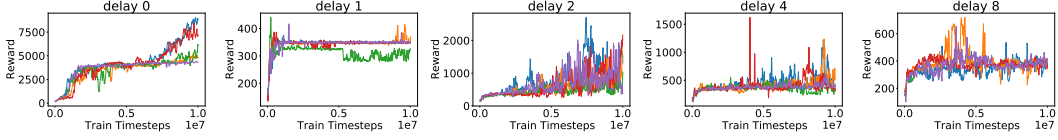

Figure 86: Training Learning Curves for Rainbow on qbert **when varying delay**. Please note the different Y-axis scales.

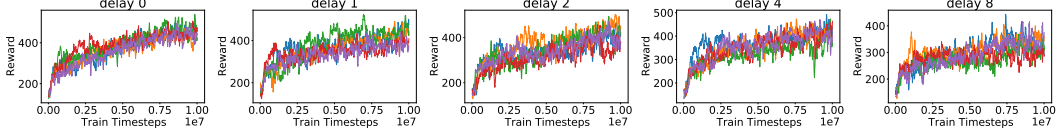

Figure 87: Training Learning Curves for Rainbow on space\_invaders **when varying delay**. Please note the different Y-axis scales.

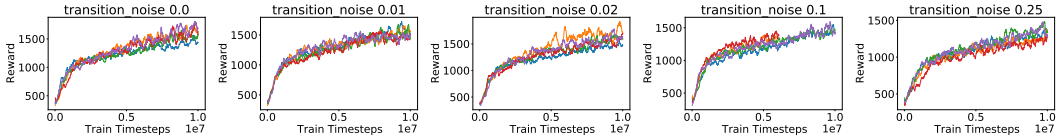

Figure 88: Training Learning Curves for Rainbow on beam\_rider **when varying transition noise**. Please note the different Y-axis scales.

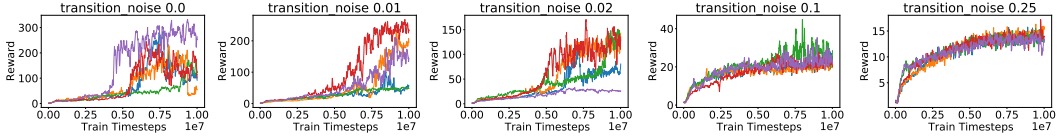

Figure 89: Training Learning Curves for Rainbow on breakout **when varying transition noise**. Please note the different Y-axis scales.

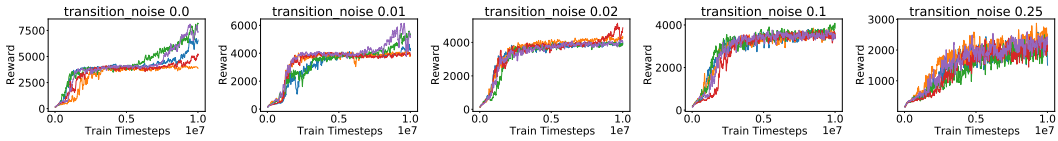

Figure 90: Training Learning Curves for Rainbow on qbert **when varying transition noise**. Please note the different Y-axis scales.

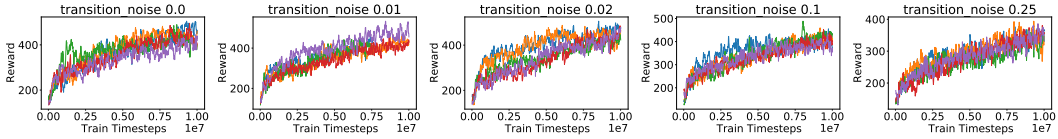

Figure 91: Training Learning Curves for Rainbow on space\_invaders **when varying transition noise**. Please note the different Y-axis scales.

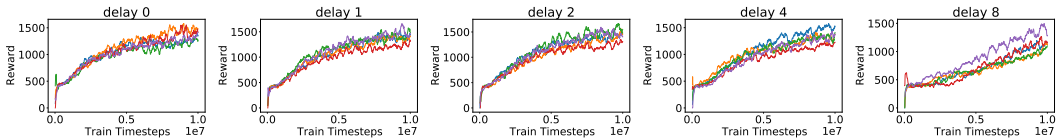

Figure 92: Training Learning Curves for A3C on beam\_rider **when varying delay**. Please note the different Y-axis scales.

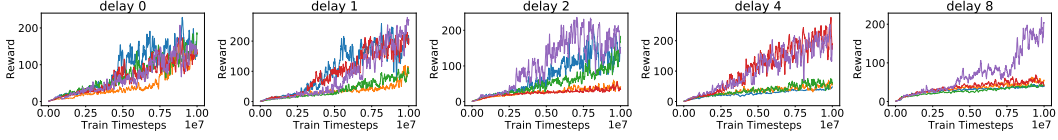

Figure 93: Training Learning Curves for A3C on breakout **when varying delay**. Please note the different Y-axis scales.

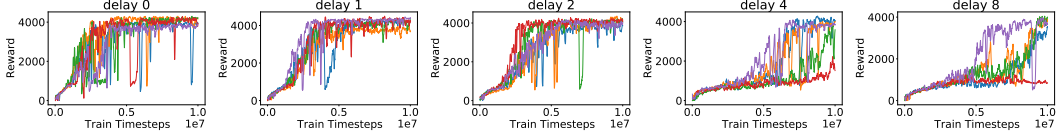

Figure 94: Training Learning Curves for A3C on qbert **when varying delay**. Please note the different Y-axis scales.

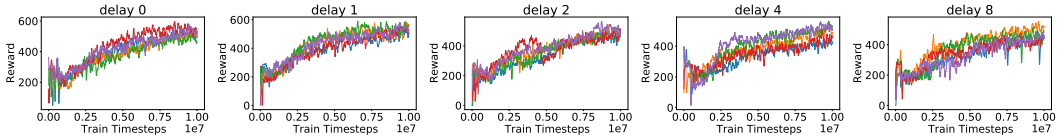

Figure 95: Training Learning Curves for A3C on space\_invaders **when varying delay**. Please note the different Y-axis scales.

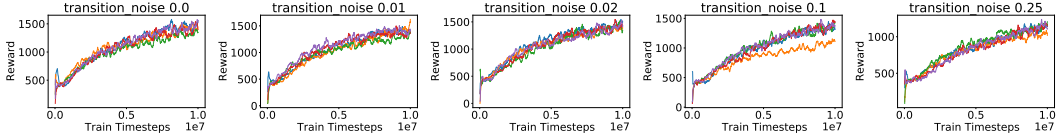

Figure 96: Training Learning Curves for A3C on beam\_rider **when varying transition noise**. Please note the different Y-axis scales.

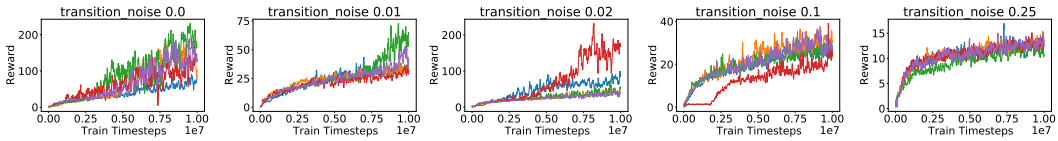

Figure 97: Training Learning Curves for A3C on breakout **when varying transition noise**. Please note the different Y-axis scales.

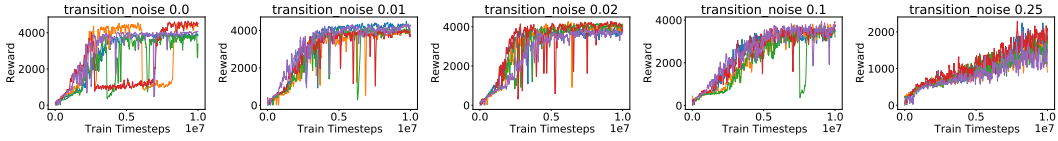

Figure 98: Training Learning Curves for A3C on qbert **when varying transition noise**. Please note the different Y-axis scales.

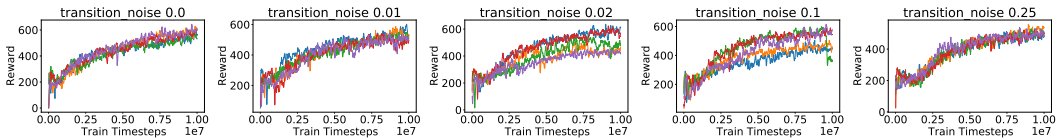

Figure 99: Training Learning Curves for A3C on space\_invaders **when varying transition noise**. Please note the different Y-axis scales.

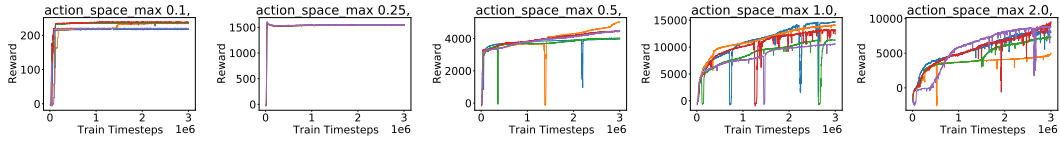

Figure 100: Training Learning Curves for SAC on HalfCheetah **when varying action max**. Please note the different Y-axis scales.

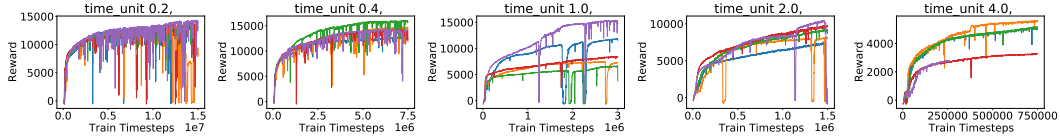

Figure 101: Training Learning Curves for SAC on HalfCheetah **when varying time unit**. Please note the different Y-axis scales.

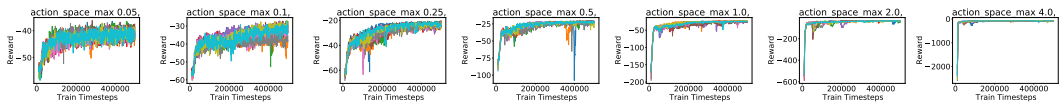

Figure 102: Training Learning Curves for SAC on Pusher **when varying action max**. Please note the different Y-axis scales.

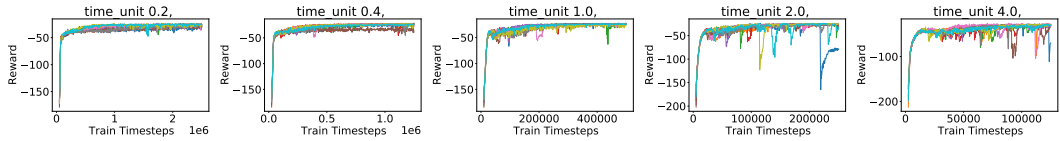

Figure 103: Training Learning Curves for SAC on Pusher **when varying time unit**. Please note the different Y-axis scales.

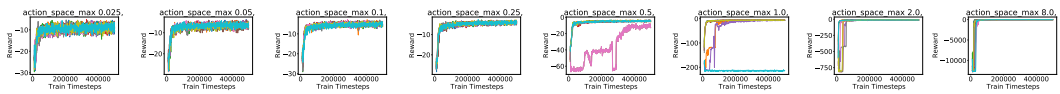

Figure 104: Training Learning Curves for SAC on Reacher **when varying action max**. Please note the different Y-axis scales.

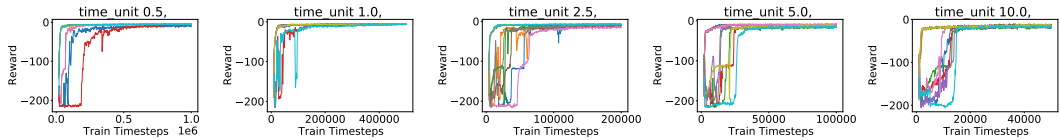

Figure 105: Training Learning Curves for SAC on Reacher **when varying time unit**. Please note the different Y-axis scales.

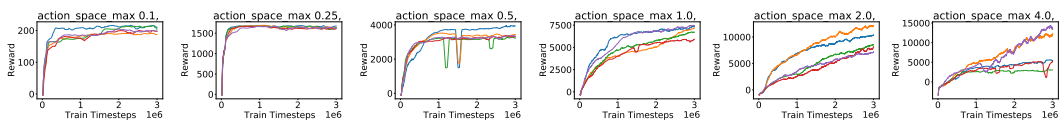

Figure 106: Training Learning Curves for DDPG **when varying action max**. Please note the different Y-axis scales.

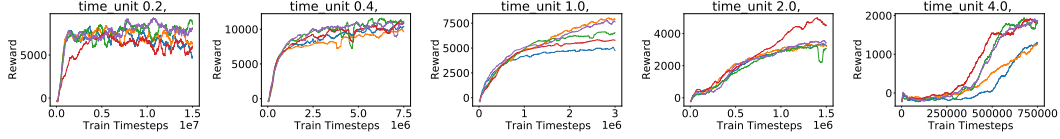

Figure 107: Training Learning Curves for DDPG when varying time unit. Please note the different Y-axis scales.

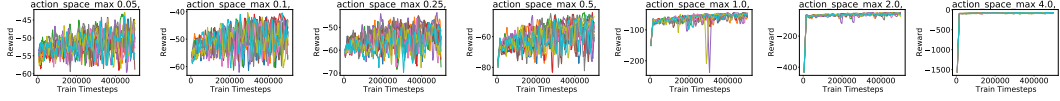

Figure 108: Training Learning Curves for DDPG when varying action max. Please note the different Y-axis scales.

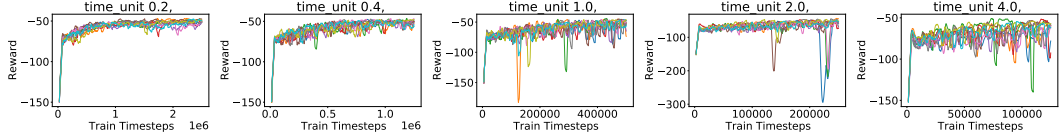

Figure 109: Training Learning Curves for DDPG when varying time unit. Please note the different Y-axis scales.

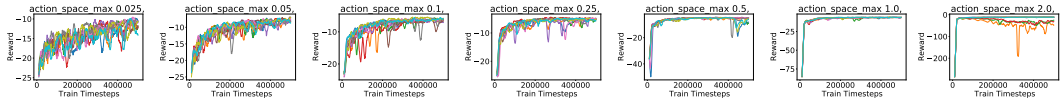

Figure 110: Training Learning Curves for DDPG when varying action max. Please note the different Y-axis scales.

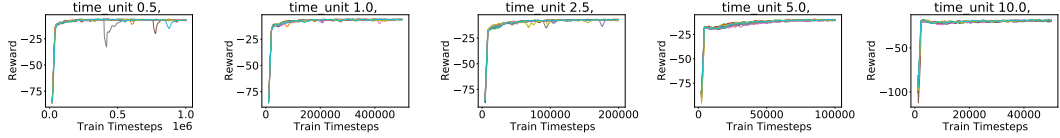

Figure 111: Training Learning Curves for DDPG when varying time unit. Please note the different Y-axis scales.

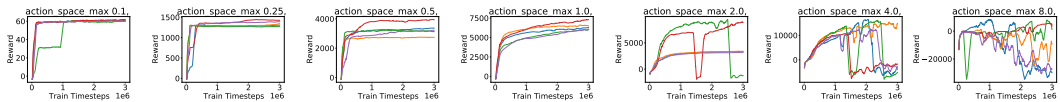

Figure 112: Training Learning Curves for TD3 when varying action max. Please note the different Y-axis scales.

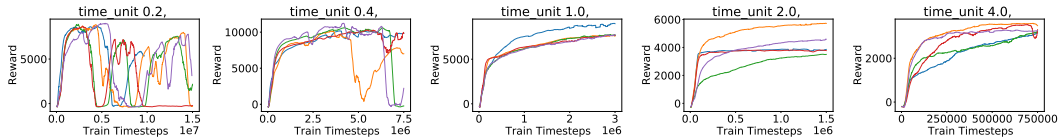

Figure 113: Training Learning Curves for TD3 when varying time unit. Please note the different Y-axis scales.

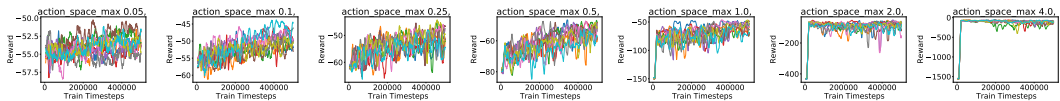

Figure 114: Training Learning Curves for TD3 when varying action max. Please note the different Y-axis scales.

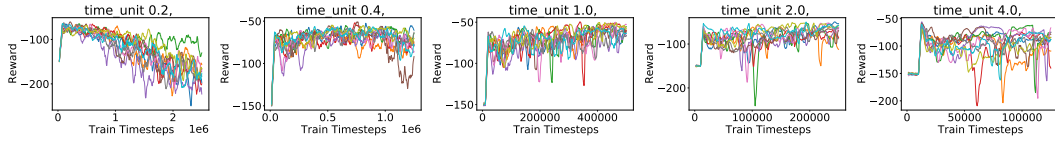

Figure 115: Training Learning Curves for TD3 **when varying time unit**. Please note the different Y-axis scales.

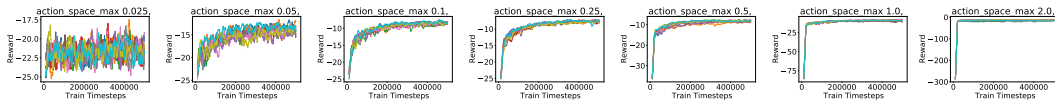

Figure 116: Training Learning Curves for TD3 **when varying action max**. Please note the different Y-axis scales.

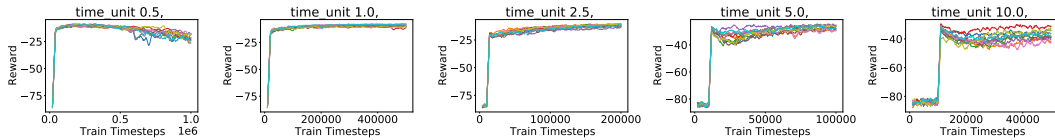

Figure 117: Training Learning Curves for TD3 **when varying time unit**. Please note the different Y-axis scales.



## 1109 O Hyperparameter Tuning

1110 We gained some interesting insights into the significance of certain hyperparameters while tuning  
 1111 them for the different algorithms. Thus, our toy environments might in fact be good test beds for  
 1112 researching hyperparameters in RL, too. For instance, *target network update frequency* turned out to  
 1113 be very significant for learning and sub-optimal values led to very noisy and unreliable training and  
 1114 unexpected results such as networks with greater capacity not performing well. Once we tuned it,  
 1115 however, training was much more reliable and, as expected, networks with greater capacity did well.  
 1116 We now describe the tuning process and an example insight in more detail.

1117 Hyperparameters were tuned for the vanilla environment; we did so manually in order to obtain  
 1118 good intuition about them before applying automated tools. We tuned the hyperparameters in sets,  
 1119 loosely in order of their significance and did 3 runs over each setting to get a more robust performance  
 1120 estimate. We describe a small part of our hyperparameter tuning for DQN next. All hyperparameter  
 1121 settings for tuned agents can be found in Appendix P.

1122 We expected that quite small neural networks would already perform well for such toy environments  
 1123 and we initially grid searched over small network sizes (Figure 118a). However, the variance in  
 1124 performance was quite high (Figure 118b). When we tried to tune DQN hyperparameters *learning*  
 1125 *starts* and *target network update frequency*, however, it became clear that the target network update  
 1126 frequency was very significant (Figure 118c and 118d) and when we repeated the grid search over  
 1127 network sizes with a better value of 800 for the target network update frequency (instead of the old  
 1128 80) this led to both better performance and lower variance (Figure 118e and 118f).

1129 We then changed the network number of neurons grid to [128, 256, 512] and changed target network  
 1130 update frequency grid to [80, 800, 8000] and continued with further tuning using the grid values  
 1131 specified in Appendix P.

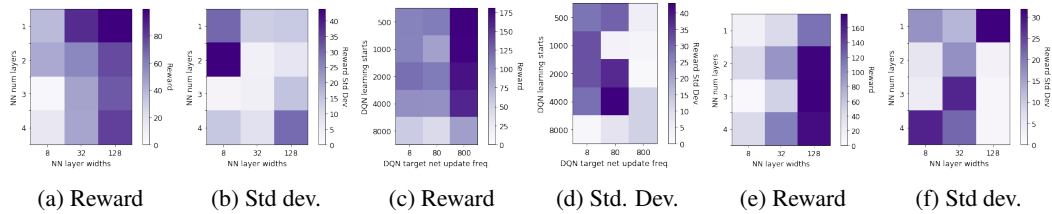

Figure 118: Mean episodic reward at the end of training for different hyperparameter sets for DQN. Please note the different colorbar scales.

## 1132 P Tuned Hyperparameters

1133 The code for corresponding experiments for both discrete and continuous environments can be found  
1134 in the accompanying code for the paper. The experiments with `_tune_hps` in the names contain  
1135 the grid of HPs that were tuned over. In some instances (where `_tune_hps` experiments do not  
1136 exist), in order to save costs, we used the default HPs in Ray. The README describes how to run  
1137 the experiments using `config` files and which `config` files correspond to which experiments. Older  
1138 experiments on the discrete toy environments were run with Ray 0.7.3, while for the newer continuous  
1139 and complex environments, they were run with Ray 0.9.0. We had to use Ray 0.7.3 for the discrete toy  
1140 environments and Ray 0.9.0 for the continuous toy ones because we had run the discrete cases for a  
1141 previous version of the paper on 0.7.3. DDPG was not working and SAC was not implemented in Ray  
1142 at that time. We tried to use Ray 0.9.0 also for the discrete version but found for the 1st algorithms  
1143 we tested that, for the same hyperparameters, the results did not transfer even across implementations  
1144 of the same library. This further makes our point about using our platform to unit test algorithms. For  
1145 the complex environments, since we had to tune the environments again anyway, we decided to use  
1146 the newer Ray version.

1147 Since we did not save the hyperparameter grids for discrete toy environments in separate files, they  
1148 are provided here. The names of the hyperparameters for the algorithms will match those used in Ray  
1149 0.7.3. The hyperparameters for the newer continuous and complex environment experiments can be  
1150 found in the respective experiment config files in the experiments directory.

### 1151 P.1 DQN

```
1152 num_layerss = [1, 2, 3, 4]
1153 layer_widths = [8, 32, 128] # at first
1154 layer_widths = [128, 256, 512] # after setting target_net_update_freq = 800
1155     showed that 128 was the best number of the old 3, we changed search
1156     grid for number of neurons
1157 fcnet_activations = ["tanh", "relu", "sigmoid"]
1158 learning_startss = [500, 1000, 2000, 4000, 8000]
1159 target_network_update_freqs = [8, 80, 800] # at first
1160 target_network_update_freqs = [80, 800, 8000] # after seeing
1161     target_net_update_freq = 800 is much better than 80, changed the grid
1162     for it
1163 double_dqn = [False, True]
1164 learning_rates = [1e-2, 1e-3, 1e-4, 1e-5, 1e-6]
1165 adam_epsilons = [1e-3, 1e-4, 1e-5, 1e-6] # also tried [1e-1, 1e-4, 1e-7, 1e
1166     -10]
1167
1168 tune.run(
1169     "DQN",
1170     stop={
1171         "timesteps_total": 20000,
1172     },
1173     config={
1174         "adam_epsilon": 1e-4,
1175         "beta_annealing_fraction": 1.0,
1176         "buffer_size": 1000000,
1177         "double_q": False,
1178         "dueling": False,
1179         "exploration_final_eps": 0.01,
1180         "exploration_fraction": 0.1,
1181         "final_prioritized_replay_beta": 1.0,
1182         "hiddens": None,
1183         "learning_starts": 1000,
1184         "lr": 1e-4,
1185         "n_step": 1,
1186         "noisy": False,
1187         "num_atoms": 1,
```



```

1188     "prioritized_replay": False,
1189     "prioritized_replay_alpha": 0.5,
1190     "sample_batch_size": 4,
1191     "schedule_max_timesteps": 20000,
1192     "target_network_update_freq": 800,
1193     "timesteps_per_iteration": 100,
1194     "train_batch_size": 32,
1195
1196     "env": "RLToy-v0",
1197     "env_config": {
1198         'dummy_seed': dummy_seed,
1199         'seed': 0,
1200         'state_space_type': 'discrete',
1201         'action_space_type': 'discrete',
1202         'state_space_size': state_space_size,
1203         'action_space_size': action_space_size,
1204         'generate_random_mdp': True,
1205         'delay': delay,
1206         'sequence_length': sequence_length,
1207         'reward_density': reward_density,
1208         'terminal_state_density': terminal_state_density,
1209         'repeats_in_sequences': False,
1210         'reward_unit': 1.0,
1211         'make_denser': False,
1212         'completely_connected': True
1213     },
1214     "model": {
1215         "fcnet_hiddens": [256, 256],
1216         "custom_preprocessor": "ohe",
1217         "custom_options": {},
1218         "fcnet_activation": "tanh",
1219         "use_lstm": False,
1220         "max_seq_len": 20,
1221         "lstm_cell_size": 256,
1222         "lstm_use_prev_action_reward": False,
1223     },
1224
1225     "callbacks": {
1226         "on_episode_end": tune.function(on_episode_end),
1227         "on_train_result": tune.function(on_train_result),
1228     },
1229     "evaluation_interval": 1,
1230     "evaluation_config": {
1231         "exploration_fraction": 0,
1232         "exploration_final_eps": 0,
1233         "batch_mode": "complete_episodes",
1234         'horizon': 100,
1235         "env_config": {
1236             "dummy_eval": True,
1237         }
1238     },
1239 },
1240 )

```

## 1241 P.2 Rainbow

```

1242 num_layersss = [1, 2, 3, 4]
1243 layer_widths = [128, 256, 512]
1244 fcnet_activations = ["tanh", "relu", "sigmoid"]

```

```

1245 learning_rates = [1e-2, 1e-3, 1e-4, 1e-5, 1e-6]
1246 learning_startss = [500, 1000, 2000, 4000, 8000]
1247 target_network_update_freqs = [80, 800, 8000]
1248 double_dqn = [False, True]
1249
1250 tune.run(
1251     "DQN",
1252     stop={
1253         "timesteps_total": 20000,
1254     },
1255     config={
1256         "adam_epsilon": 1e-4,
1257         "buffer_size": 1000000,
1258         "double_q": True,
1259         "dueling": True,
1260         "lr": 1e-3,
1261         "exploration_final_eps": 0.01,
1262         "exploration_fraction": 0.1,
1263         "schedule_max_timesteps": 20000,
1264         "learning_starts": 500,
1265         "target_network_update_freq": 80,
1266         "n_step": 4,
1267         "noisy": True,
1268         "num_atoms": 10,
1269         "prioritized_replay": True,
1270         "prioritized_replay_alpha": 0.75,
1271         "prioritized_replay_beta": 0.4,
1272         "final_prioritized_replay_beta": 1.0,
1273         "beta_annealing_fraction": 1.0,
1274
1275         "sample_batch_size": 4,
1276         "timesteps_per_iteration": 1000,
1277         "train_batch_size": 32,
1278         "min_iter_time_s": 1,
1279
1280         "env": "RLToy-v0",
1281         "env_config": {
1282             'dummy_seed': dummy_seed,
1283             'seed': 0,
1284             'state_space_type': 'discrete',
1285             'action_space_type': 'discrete',
1286             'state_space_size': state_space_size,
1287             'action_space_size': action_space_size,
1288             'generate_random_mdp': True,
1289             'delay': delay,
1290             'sequence_length': sequence_length,
1291             'reward_density': reward_density,
1292             'terminal_state_density': terminal_state_density,
1293             'repeats_in_sequences': False,
1294             'reward_unit': 1.0,
1295             'make_denser': False,
1296             'completely_connected': True
1297         },
1298         "model": {
1299             "fcnet_hiddens": [256, 256],
1300             "custom_preprocessor": "ohe",
1301             "custom_options": {},
1302             "fcnet_activation": "tanh",
1303             "use_lstm": False,

```

```

1304         "max_seq_len": 20,
1305         "lstm_cell_size": 256,
1306         "lstm_use_prev_action_reward": False,
1307     },
1308     "callbacks": {
1309         "on_episode_end": tune.function(on_episode_end),
1310         "on_train_result": tune.function(on_train_result),
1311     },
1312     "evaluation_interval": 1,
1313     "evaluation_config": {
1314         "exploration_fraction": 0,
1315         "exploration_final_eps": 0,
1316         "batch_mode": "complete_episodes",
1317         'horizon': 100,
1318         "env_config": {
1319             "dummy_eval": True,
1320         }
1321     },
1322 },
1323 )

```

### 1324 P.3 A3C

1325 Grids of value for the hyperparameters over which they were tuned:

```

1326 num_layerss = [1, 2, 3, 4]
1327 layer_widths = [64, 128, 256]
1328
1329 learning_rates = [1e-2, 1e-3, 1e-4, 1e-5, 1e-6]
1330 fcnet_activations = ["tanh", "relu", "sigmoid"]
1331
1332 lambdas = [0, 0.5, 0.95, 1.0]
1333 grad_clips = [10, 30, 100]
1334
1335 vf_loss_coeffs = [0.1, 0.5, 2.5]
1336 entropy_coeffs = [0.001, 0.01, 0.1, 1]
1337
1338
1339 tune.run(
1340     "A3C",
1341     stop={
1342         "timesteps_total": 150000,
1343     },
1344     config={
1345         "sample_batch_size": 10,
1346         "train_batch_size": 100,
1347         "use_pytorch": False,
1348         "lambda": 0.0,
1349         "grad_clip": 10.0,
1350         "lr": 0.0001,
1351         "lr_schedule": None,
1352         "vf_loss_coeff": 0.5,
1353         "entropy_coeff": 0.1,
1354         "min_iter_time_s": 0,
1355         "sample_async": True,
1356         "timesteps_per_iteration": 5000,
1357         "num_workers": 3,
1358         "num_envs_per_worker": 5,
1359
1360         "optimizer": {

```

```

1361         "grads_per_step": 10
1362     },
1363
1364     "env": "RLToy-v0",
1365     "env_config": {
1366         'dummy_seed': dummy_seed,
1367         'seed': 0,
1368         'state_space_type': 'discrete',
1369         'action_space_type': 'discrete',
1370         'state_space_size': state_space_size,
1371         'action_space_size': action_space_size,
1372         'generate_random_mdp': True,
1373         'delay': delay,
1374         'sequence_length': sequence_length,
1375         'reward_density': reward_density,
1376         'terminal_state_density': terminal_state_density,
1377         'repeats_in_sequences': False,
1378         'reward_unit': 1.0,
1379         'make_denser': False,
1380         'completely_connected': True
1381     },
1382     "model": {
1383         "fcnet_hiddens": [128, 128, 128],
1384         "custom_preprocessor": "ohe",
1385         "custom_options": {},
1386         "fcnet_activation": "tanh",
1387         "use_lstm": False,
1388         "max_seq_len": 20,
1389         "lstm_cell_size": 256,
1390         "lstm_use_prev_action_reward": False,
1391     },
1392
1393     "callbacks": {
1394         "on_episode_end": tune.function(on_episode_end),
1395         "on_train_result": tune.function(on_train_result),
1396     },
1397     "evaluation_interval": 1,
1398     "evaluation_config": {
1399         "exploration_fraction": 0,
1400         "exploration_final_eps": 0,
1401         "batch_mode": "complete_episodes",
1402         'horizon': 100,
1403         "env_config": {
1404             "dummy_eval": True,
1405         }
1406     },
1407 },
1408 )

```

#### 1409 P.4 A3C + LSTM

1410 Grids of value for the hyperparameters over which they were tuned:

```

1411
1412 num_layerss = [1, 2, 3, 4]
1413 layer_widths = [64, 128, 256]
1414
1415 learning_rates = [1e-2, 1e-3, 1e-4, 1e-5, 1e-6]
1416 fcnet_activations = ["tanh", "relu", "sigmoid"]
1417

```

```

1418 lambdas = [0, 0.5, 0.95, 1.0]
1419 grad_clips = [10, 30, 100]
1420
1421 vf_loss_coeffs = [0.1, 0.5, 2.5]
1422 entropy_coeffs = [0.001, 0.01, 0.1, 1]
1423
1424 lstm_cell_sizes = [64, 256, 512]
1425 lstm_use_prev_action_rewards = [False, True]
1426
1427 tune.run(
1428     "A3C",
1429     stop={
1430         "timesteps_total": 150000,
1431     },
1432     config={
1433         "sample_batch_size": 10,
1434         "train_batch_size": 100,
1435         "use_pytorch": False,
1436         "lambda": 0.0,
1437         "grad_clip": 10.0,
1438         "lr": 0.0001,
1439         "lr_schedule": None,
1440         "vf_loss_coeff": 0.1,
1441         "entropy_coeff": 0.1,
1442         "min_iter_time_s": 0,
1443         "sample_async": True,
1444         "timesteps_per_iteration": 5000,
1445         "num_workers": 3,
1446         "num_envs_per_worker": 5,
1447
1448         "optimizer": {
1449             "grads_per_step": 10
1450         },
1451
1452         "env": "RLToy-v0",
1453         "env_config": {
1454             'dummy_seed': dummy_seed,
1455             'seed': 0,
1456             'state_space_type': 'discrete',
1457             'action_space_type': 'discrete',
1458             'state_space_size': state_space_size,
1459             'action_space_size': action_space_size,
1460             'generate_random_mdp': True,
1461             'delay': delay,
1462             'sequence_length': sequence_length,
1463             'reward_density': reward_density,
1464             'terminal_state_density': terminal_state_density,
1465             'repeats_in_sequences': False,
1466             'reward_unit': 1.0,
1467             'make_denser': False,
1468             'completely_connected': True
1469         },
1470         "model": {
1471             "fcnet_hiddens": [128, 128, 128],
1472             "custom_preprocessor": "ohe",
1473             "custom_options": {},
1474             "fcnet_activation": "tanh",
1475             "use_lstm": True,

```

```

1477     "max_seq_len": delay + sequence_length,
1478     "lstm_cell_size": 64,
1479     "lstm_use_prev_action_reward": True,
1480 },
1481
1482     "callbacks": {
1483         "on_episode_end": tune.function(on_episode_end),
1484         "on_train_result": tune.function(on_train_result),
1485     },
1486     "evaluation_interval": 1,
1487     "evaluation_config": {
1488         "exploration_fraction": 0,
1489         "exploration_final_eps": 0,
1490         "batch_mode": "complete_episodes",
1491         'horizon': 100,
1492         "env_config": {
1493             "dummy_eval": True,
1494         }
1495     },
1496 },
1497 )

```

## 1498 Q More on Conclusion and Future Work

1499 Our benchmark is also designed with long term AGI in mind. Dimensions like identifying delays and  
1500 sequences may be essential to solving AGI because when these are identified we know the causal  
1501 actions leading to a reward. Most current algorithms lack such capability because they cannot figure  
1502 out the causality [43].

1503 Among the continuous environments, we have a toy task of moving along a line. Here, we hand  
1504 out greater rewards the closer a point object is to moving along a line. This is also a better task to  
1505 test exploration than the completely random discrete environments. It already gave some interesting  
1506 results and further work will follow. We are in the process of implementing plug and play *model-*  
1507 *based* metrics to evaluate model-based algorithms, such as the Wasserstein metric (likely a sampled  
1508 version because analytical calculation would be intractable in many cases) between the true dynamics  
1509 models and the learnt one to keep track of how model learning is proceeding. Our Environments plan  
1510 to allow using their transition and reward functions to perform *imaginary* rollouts without affecting  
1511 the current state of the system.

1512 Another significant dimension is *reachability* in the transition graph. This is currently implemented  
1513 using diameter. We believe a lot more insights can be gained from graph theory to model toy  
1514 environments which try to mimic specific real life situations at a very high level. We plan to add  
1515 random generation of specific types of transition graphs and not just the regularly structured one  
1516 using the diameter.

1517 The fine-grained control of dimensions allows relating these to good hyperparameter choices. So, our  
1518 playground could also be used to learn a mapping from hardness dimensions to hyperparameters for  
1519 different types of environments and even to warm-start hyperparameter optimisation for environments  
1520 with similar hardness dimensions. This holds promise for future meta-learning algorithms. In a  
1521 similar vein, it could also be used to perform Combined Algorithm Selection and Hyperparameter  
1522 Optimisation [54], since it's clear that currently different RL algorithms do well in different kinds of  
1523 environments.

1524 Further interesting toy experiments which are already possible with our platform are varying the  
1525 terminal state densities to have environments for testing *safe RL* agents.

1526 The states and actions contained in a rewardable sequence could just be a single *compound* state and  
1527 *compound* action if we discretised time in a suitable manner. This brings us to the idea of learning at  
1528 multiple timescales. HRL algorithms, with formulations like the options framework [53], could try to  
1529 identify these rewardable sequences at the higher level and then carry out *atomic* actions at the lower  
1530 level.

1531 We also hope to benchmark other algorithms like PPO<sup>3</sup> [48], Rudder [4], MCTS [49], DDPG<sup>4</sup> [34]  
1532 on continuous tasks and table-based agents and to show theoretical results match with practice in toy  
1533 environments.

1534 We also aim to promote reproducibility in RL as in [18] and hope our platform helps with that goal.  
1535 To this end, we have already improved the Gym Box and Discrete Spaces to allow their seeds to  
1536 be controlled at initialization time as well.

1537 We need different RL agents for different environments. Aside from some basic heuristics such as  
1538 applying DDPG [34] to continuous environments and DQN to discrete environments, it is not very  
1539 clear when to use which RL agents. We hope this will be a first step to being able to identify from  
1540 the environment what sort of algorithm to use and to help build adaptive agents which adapt to the  
1541 environment at hand. Additionally, aside from being a great platform for designing and debugging RL  
1542 agents, *MDP Playground* is also a great didactic tool for teaching how RL agents work in different  
1543 environments.

---

<sup>3</sup>We tried PPO but could not get it to learn

<sup>4</sup>We tried DDPG also but there seemed to be a bug in the implementation and it crashed even on tuned examples from Ray

## 1544 **R CPU specifications**

1545 Cluster experiments were run on *Intel(R) Xeon(R) CPU E5-2630 v4 @ 2.20GHz* cores for approxi-  
1546 mately 55000 CPU hours.

### 1547 **R.1 CO2 Emission Related to Experiments**

1548 Experiments were conducted using a private infrastructure, which has a carbon efficiency of 0.432  
1549 kgCO<sub>2</sub>eq/kWh. A cumulative of 55000 hours of computation was performed on hardware of type  
1550 Intel Xeon E5-2699 (TDP of 145W).

1551 Total emissions are estimated to be 3445.2 kgCO<sub>2</sub>eq of which 0 percents were directly offset.

1552 Estimations were conducted using the MachineLearning Impact calculator presented in [29].

1553 The laptop specification were:

```
1554 processor      : 0
1555 vendor_id      : GenuineIntel
1556 cpu family     : 6
1557 model          : 158
1558 model name     : Intel(R) Core(TM) i7-8850H CPU @ 2.60GHz
1559 stepping      : 10
1560 microcode      : 0xb4
1561 cpu MHz        : 900.055
1562 cache size     : 9216 KB
1563 physical id    : 0
1564 siblings       : 12
1565 core id        : 0
1566 cpu cores      : 6
1567 apicid         : 0
1568 initial apicid : 0
1569 fpu            : yes
1570 fpu_exception  : yes
1571 cpuid level    : 22
1572 wp            : yes
1573 flags          : fpu vme de pse tsc msr pae mce cx8 apic sep mtrr pge mca
1574               cmov pat pse36 clflush dts acpi mmx fxsr sse sse2 ss ht tm pbe syscall
1575               nx pdpe1gb rdtscp lm constant_tsc art arch_perfmon pebs bts rep_good
1576               nopl xtopology nonstop_tsc cpuid aperfmperf tsc_known_freq pni
1577               pclmulqdq dtes64 monitor ds_cpl vmx smx est tm2 ssse3 sdbg fma cx16
1578               xtpr pdcm pcid sse4_1 sse4_2 x2apic movbe popcnt tsc_deadline_timer aes
1579               xsave avx f16c rdrand lahf_lm abm 3dnowprefetch cpuid_fault epb
1580               invpcid_single pti ssbd ibrs ibpb stibp tpr_shadow vnmi flexpriority
1581               ept vpid ept_ad fsgsbase tsc_adjust bmi1 hle avx2 smep bmi2 erms
1582               invpcid rtm mpx rdseed adx smap clflushopt intel_pt xsaveopt xsavec
1583               xgetbv1 xsaves dtherm ida arat pln pts hwp hwp_notify hwp_act_window
1584               hwp_epp md_clear flush_l1d
1585 bugs           : cpu_meltdown spectre_v1 spectre_v2 spec_store_bypass l1tf
1586               mds swapgs
1587 bogomips       : 5184.00
1588 clflush size   : 64
1589 cache_alignment : 64
1590 address sizes   : 39 bits physical, 48 bits virtual
1591 power management:
```
